# Supplementary material for: HIV-1 Tat Length: Comparative and Functional Considerations
Source: Front Microbiol. 2020 Mar 24;11:444. doi: 10.3389/fmicb.2020.00444 (PMC7105873; doi:10.3389/fmicb.2020.00444)
Supplement: Supplemental Table 1 — Publication results from a PubMed search for HIV-1 Tat from 2009 to 2018. Reported here are the publications used for the analysis in Figure 1. The parameters used on the PubMed search were: (HIV-1 Tat) NOT “review”[Publication Type], 2009/01/01 to 2018/12/31, and free full text. 973 publications were examined for their utilization of Tat, whether they were: a recombinant protein, expressed within an animal model, derived from a plasmid, or used in a molecular simulation. Publications that did not explicitly state the length of Tat utilized or the molecular clone that it was derived from were listed as Tat length not stated in publication (LNS). The majority of HIV-1 transgenic animal models are Tat 86, however, if it was not explicitly stated it was reported as LNS. There were publications that were not accessible and those were listed as No access to publication (NAP). Additionally, publications that are listed as Tat peptides (PEP) refers to any truncations of Tat that are not 72 or 86 residues in length. Publications that solely examined the sequences of patients (i.e., Did not utilize a molecular clone that would express Tat, a recombinant protein, a transgenic animal model, or an expression vector) were listed as No Tat used in this publication (NTU) and not included in Figure 1 (n = 124). Publications that examined SIV rather than HIV were listed as SIV and were also not included in Figure 1 (n = 3). Abbreviation used in this document are: PEP, Tat peptide; 72, Tat 72; 86, Tat 86; 101, Tat 101; NTU, No Tat used in this publication; LNS, Tat length not stated in publication, and NAP, no access to publication. [file Table_1.XLSX]

## Sheet: pubmed_2019-2009
publication_num	tat_length	year	PMID	publication
1	86	2018	30774045	Zhao L, Liu M, Ouyang J, Zhu Z, Geng W, Dong J, Xiong Y, Wang S, Zhang X, Qiao Y, Ding H, Sun H, Liang G, Shang H, Han X. The Per-1 Short Isoform Inhibits de novo HIV-1 Transcription in Resting CD4+ T-cells. Curr HIV Res. 2018;16(6):384-395. doi: 10.2174/1570162X17666190218145048. PubMed PMID: 30774045; PubMed Central PMCID: PMC6446521.
2	86	2018	30574066	Li J, Wang W, Tong P, Leung CK, Yang G, Li Z, Li N, Sun X, Han Y, Lu C, Kuang D, Dai J, Zeng X. Autophagy Induction by HIV-Tat and Methamphetamine in Primary Midbrain Neuronal Cells of Tree Shrews via the mTOR Signaling and ATG5/ATG7 Pathway. Front Neurosci. 2018 Dec 6;12:921. doi: 10.3389/fnins.2018.00921. eCollection 2018. PubMed PMID: 30574066; PubMed Central PMCID: PMC6291520.
3	PEP	2018	30532532	Amin M, Bagheri M, Mansourian M, Jaafari MR, Ten Hagen TL. Regulation of in vivo behavior of TAT-modified liposome by associated protein corona and avidity to tumor cells. Int J Nanomedicine. 2018 Nov 15;13:7441-7455. doi: 10.2147/IJN.S170274. eCollection 2018. PubMed PMID: 30532532; PubMed Central PMCID: PMC6241867.
4	PEP	2018	30514815	Schulze-Gahmen U, Hurley JH. Structural mechanism for HIV-1 TAR loop recognition by Tat and the super elongation complex. Proc Natl Acad Sci U S A. 2018 Dec 18;115(51):12973-12978. doi: 10.1073/pnas.1806438115. Epub 2018 Dec 4. PubMed PMID: 30514815; PubMed Central PMCID: PMC6305006.
5	LNS	2018	30455316	Cao Y, Lei X, Ribeiro RM, Perelson AS, Liang J. Probabilistic control of HIV latency and transactivation by the Tat gene circuit. Proc Natl Acad Sci U S A. 2018 Dec 4;115(49):12453-12458. doi: 10.1073/pnas.1811195115. Epub 2018 Nov 19. PubMed PMID: 30455316; PubMed Central PMCID: PMC6298123.
6	NTU	2018	30443645	Buch S, Periyasamy P, Guo M. Involvement of Epigenetic Promoter DNA Methylation of miR-124 in the Pathogenesis of HIV-1-Associated Neurocognitive Disorders. Epigenet Insights. 2018 Oct 14;11:2516865718806904. doi: 10.1177/2516865718806904. eCollection 2018. PubMed PMID: 30443645; PubMed Central PMCID: PMC6233963.
7	NTU	2018	30440043	Telwatte S, Lee S, Somsouk M, Hatano H, Baker C, Kaiser P, Kim P, Chen TH, Milush J, Hunt PW, Deeks SG, Wong JK, Yukl SA. Gut and blood differ in constitutive blocks to HIV transcription, suggesting tissue-specific differences in the mechanisms that govern HIV latency. PLoS Pathog. 2018 Nov 15;14(11):e1007357. doi: 10.1371/journal.ppat.1007357. eCollection 2018 Nov. PubMed PMID: 30440043; PubMed …
8	NTU	2018	30409205	Ma G, Chen L, Luo J, Wang B, Wang C, Li M, Huang C, Du J, Ma J, Chang Y, He H. Histone acetyl transferase TIP60 inhibits the replication of influenza a virus by activation the TBK1-IRF3 pathway. Virol J. 2018 Nov 8;15(1):172. doi: 10.1186/s12985-018-1079-3. PubMed PMID: 30409205; PubMed Central PMCID: PMC6225679.
9	NTU	2018	30402840	Zheng ZJ, Fu J, Zhi F, Liu WJ, Guo YJ, Zhu DD, Mo JG. The effects of interventional therapy on serum HTATIP2/TIP30, B7-H4 and short-term curative effect in primary hepatocellular carcinoma. Eur Rev Med Pharmacol Sci. 2018 Oct;22(20):6778-6783. doi: 10.26355/eurrev_201810_16144. PubMed PMID: 30402840.
10	PEP, 72, 86	2018	30401776	Kyei GB, Meng S, Ramani R, Niu A, Lagisetti C, Webb TR, Ratner L. Splicing Factor 3B Subunit 1 Interacts with HIV Tat and Plays a Role in Viral Transcription and Reactivation from Latency. MBio. 2018 Nov 6;9(6). pii: e01423-18. doi: 10.1128/mBio.01423-18. PubMed PMID: 30401776; PubMed Central PMCID: PMC6222122.
11	PEP	2018	30395647	Leoz M, Kukanja P, Luo Z, Huang F, Cary DC, Peterlin BM, Fujinaga K. HEXIM1-Tat chimera inhibits HIV-1 replication. PLoS Pathog. 2018 Nov 5;14(11):e1007402. doi: 10.1371/journal.ppat.1007402. eCollection 2018 Nov. PubMed PMID: 30395647; PubMed Central PMCID: PMC6245832.
12	86	2018	30390000	Mohseni Ahooyi T, Shekarabi M, Torkzaban B, Langford TD, Burdo TH, Gordon J, Datta PK, Amini S, Khalili K. Dysregulation of Neuronal Cholesterol Homeostasis upon Exposure to HIV-1 Tat and Cocaine Revealed by RNA-Sequencing. Sci Rep. 2018 Nov 2;8(1):16300. doi: 10.1038/s41598-018-34539-9. PubMed PMID: 30390000; PubMed Central PMCID: PMC6215004.
13	86	2018	30356847	Tiwari S, Atluri VSR, Yndart Arias A, Jayant RD, Kaushik A, Geiger J, Nair MN. Withaferin A Suppresses Beta Amyloid in APP Expressing Cells: Studies for Tat and Cocaine Associated Neurological Dysfunctions. Front Aging Neurosci. 2018 Sep 27;10:291. doi: 10.3389/fnagi.2018.00291. eCollection 2018. PubMed PMID: 30356847; PubMed Central PMCID: PMC6190869.
14	PEP, 72	2018	30323330	Pham VV, Salguero C, Khan SN, Meagher JL, Brown WC, Humbert N, de Rocquigny H, Smith JL, D'Souza VM. HIV-1 Tat interactions with cellular 7SK and viral TAR RNAs identifies dual structural mimicry. Nat Commun. 2018 Oct 15;9(1):4266. doi: 10.1038/s41467-018-06591-6. PubMed PMID: 30323330; PubMed Central PMCID: PMC6189040.
15	NTU	2018	30316868	Massanella M, Yek C, Lada SM, Nakazawa M, Shefa N, Huang K, Richman DD. Improved assays to measure and characterize the inducible HIV reservoir. EBioMedicine. 2018 Oct;36:113-121. doi: 10.1016/j.ebiom.2018.09.036. Epub 2018 Oct 11. PubMed PMID: 30316868; PubMed Central PMCID: PMC6197429.
16	86	2018	30314515	Putatunda R, Zhang Y, Li F, Yang XF, Barbe MF, Hu W. Adult neurogenic deficits in HIV-1 Tg26 transgenic mice. J Neuroinflammation. 2018 Oct 12;15(1):287. doi: 10.1186/s12974-018-1322-2. PubMed PMID: 30314515; PubMed Central PMCID: PMC6182864.
17	86	2018	30305110	Kim S, Hahn YK, Podhaizer EM, McLane VD, Zou S, Hauser KF, Knapp PE. A central role for glial CCR5 in directing the neuropathological interactions of HIV-1 Tat and opiates. J Neuroinflammation. 2018 Oct 10;15(1):285. doi: 10.1186/s12974-018-1320-4. PubMed PMID: 30305110; PubMed Central PMCID: PMC6180355.
18	86	2018	30241541	Wang M, Yang W, Chen Y, Wang J, Tan J, Qiao W. Cellular RelB interacts with the transactivator Tat and enhance HIV-1 expression. Retrovirology. 2018 Sep 21;15(1):65. doi: 10.1186/s12977-018-0447-9. PubMed PMID: 30241541; PubMed Central PMCID: PMC6150996.
19	86	2018	30235286	Elizaga ML, Li SS, Kochar NK, Wilson GJ, Allen MA, Tieu HVN, Frank I, Sobieszczyk ME, Cohen KW, Sanchez B, Latham TE, Clarke DK, Egan MA, Eldridge JH, Hannaman D, Xu R, Ota-Setlik A, McElrath MJ, Hay CM; NIAID HIV Vaccine Trials Network (HVTN) 087 Study Team. Safety and tolerability of HIV-1 multiantigen pDNA vaccine given with IL-12 plasmid DNA via electroporation, boosted with a recombinant ves…
20	86	2018	30195798	Ji H, Lu P, Liu B, Qu X, Wang Y, Jiang Z, Yang X, Zhong Y, Yang H, Pan H, Zhao L, Xu J, Lu H, Zhu H. Zinc-Finger Nucleases Induced by HIV-1 Tat Excise HIV-1 from the Host Genome in Infected and Latently Infected Cells. Mol Ther Nucleic Acids. 2018 Sep 7;12:67-74. doi: 10.1016/j.omtn.2018.04.014. Epub 2018 May 3. PubMed PMID: 30195798; PubMed Central PMCID: PMC6023959.
21	86	2018	30190568	Cardo L, Nawroth I, Cail PJ, McKeating JA, Hannon MJ. Metallo supramolecular cylinders inhibit HIV-1 TAR-TAT complex formation and viral replication in cellulo. Sci Rep. 2018 Sep 6;8(1):13342. doi: 10.1038/s41598-018-31513-3. PubMed PMID: 30190568; PubMed Central PMCID: PMC6127258.
22	86	2018	30158296	Teodorof-Diedrich C, Spector SA. Human Immunodeficiency Virus Type 1 gp120 and Tat Induce Mitochondrial Fragmentation and Incomplete Mitophagy in Human Neurons. J Virol. 2018 Oct 29;92(22). pii: e00993-18. doi: 10.1128/JVI.00993-18. Print 2018 Nov 15. PubMed PMID: 30158296; PubMed Central PMCID: PMC6206485.
23	101	2018	30138348	Whitmill A, Kim S, Rojas V, Gulraiz F, Afreen K, Jain M, Singh M, Park IW. Signature molecules expressed differentially in a liver disease stage-specific manner by HIV-1 and HCV co-infection. PLoS One. 2018 Aug 23;13(8):e0202524. doi: 10.1371/journal.pone.0202524. eCollection 2018. PubMed PMID: 30138348; PubMed Central PMCID: PMC6107166.
24	86	2018	30114402	Hermes DJ, Xu C, Poklis JL, Niphakis MJ, Cravatt BF, Mackie K, Lichtman AH, Ignatowska-Jankowska BM, Fitting S. Neuroprotective effects of fatty acid amide hydrolase catabolic enzyme inhibition in a HIV-1 Tat model of neuroAIDS. Neuropharmacology. 2018 Oct;141:55-65. doi: 10.1016/j.neuropharm.2018.08.013. Epub 2018 Aug 13. PubMed PMID: 30114402; PubMed Central PMCID: PMC6296377.
25	86	2018	30111566	Welch JL, Kaddour H, Schlievert PM, Stapleton JT, Okeoma CM. Semen Exosomes Promote Transcriptional Silencing of HIV-1 by Disrupting NF-κB/Sp1/Tat Circuitry. J Virol. 2018 Oct 12;92(21). pii: e00731-18. doi: 10.1128/JVI.00731-18. Print 2018 Nov 1. PubMed PMID: 30111566; PubMed Central PMCID: PMC6189507.
26	101	2018	29966509	Thangaraj A, Periyasamy P, Liao K, Bendi VS, Callen S, Pendyala G, Buch S. HIV-1 TAT-mediated microglial activation: role of mitochondrial dysfunction and defective mitophagy. Autophagy. 2018;14(9):1596-1619. doi: 10.1080/15548627.2018.1476810. Epub 2018 Jul 26. PubMed PMID: 29966509; PubMed Central PMCID: PMC6135576.
27	86	2018	29944719	Basova L, Najera JA, Bortell N, Wang D, Moya R, Lindsey A, Semenova S, Ellis RJ, Marcondes MCG. Dopamine and its receptors play a role in the modulation of CCR5 expression in innate immune cells following exposure to Methamphetamine: Implications to HIV infection. PLoS One. 2018 Jun 26;13(6):e0199861. doi: 10.1371/journal.pone.0199861. eCollection 2018. PubMed PMID: 29944719; PubMed Central PMCID…
28	NTU	2018	29942655	Tongo M, de Oliveira T, Martin DP. Patterns of genomic site inheritance in HIV-1M inter-subtype recombinants delineate the most likely genomic sites of subtype-specific adaptation. Virus Evol. 2018 Jun 11;4(1):vey015. doi: 10.1093/ve/vey015. eCollection 2018 Jan. PubMed PMID: 29942655; PubMed Central PMCID: PMC6007327.
29	86	2018	29922746	Wodarski R, Bagdas D, Paris JJ, Pheby T, Toma W, Xu R, Damaj MI, Knapp PE, Rice ASC, Hauser KF. Reduced intraepidermal nerve fibre density, glial activation, and sensory changes in HIV type-1 Tat-expressing female mice: involvement of Tat during early stages of HIV-associated painful sensory neuropathy. Pain Rep. 2018 May 14;3(3):e654. doi: 10.1097/PR9.0000000000000654. eCollection 2018 May. PubM…
30	101	2018	29884859	Chopard C, Tong PBV, Tóth P, Schatz M, Yezid H, Debaisieux S, Mettling C, Gross A, Pugnière M, Tu A, Strub JM, Mesnard JM, Vitale N, Beaumelle B. Cyclophilin A enables specific HIV-1 Tat palmitoylation and accumulation in uninfected cells. Nat Commun. 2018 Jun 8;9(1):2251. doi: 10.1038/s41467-018-04674-y. PubMed PMID: 29884859; PubMed Central PMCID: PMC5993824.
31	86	2018	29875444	Kim J, Kim YS. Effect of HIV-1 Tat on the formation of the mitotic spindle by interaction with ribosomal protein S3. Sci Rep. 2018 Jun 6;8(1):8680. doi: 10.1038/s41598-018-27008-w. PubMed PMID: 29875444; PubMed Central PMCID: PMC5989196.
32	101	2018	29858049	Wang B, Zuo J, Kang W, Wei Q, Li J, Wang C, Liu Z, Lu Y, Zhuang Y, Dang B, Liu Q, Kang W, Sun Y. Generation of Hutat2:Fc Knockin Primary Human Monocytes Using CRISPR/Cas9. Mol Ther Nucleic Acids. 2018 Jun 1;11:130-141. doi: 10.1016/j.omtn.2018.01.012. Epub 2018 Feb 7. PubMed PMID: 29858049; PubMed Central PMCID: PMC5992333.
33	LNS	2018	29857168	Mefferd AL, Bogerd HP, Irwan ID, Cullen BR. Insights into the mechanisms underlying the inactivation of HIV-1 proviruses by CRISPR/Cas. Virology. 2018 Jul;520:116-126. doi: 10.1016/j.virol.2018.05.016. Epub 2018 May 29. PubMed PMID: 29857168; PubMed Central PMCID: PMC6100742.
34	PEP	2018	29856994	Danielsen EM, Hansen GH. Impact of cell-penetrating peptides (CPPs) melittin and Hiv-1 Tat on the enterocyte brush border using a mucosal explant system. Biochim Biophys Acta Biomembr. 2018 Aug;1860(8):1589-1599. doi: 10.1016/j.bbamem.2018.05.015. Epub 2018 May 29. PubMed PMID: 29856994.
35	86	2018	29845934	Faust TB, Li Y, Bacon CW, Jang GM, Weiss A, Jayaraman B, Newton BW, Krogan NJ, D'Orso I, Frankel AD. The HIV-1 Tat protein recruits a ubiquitin ligase to reorganize the 7SK snRNP for transcriptional activation. Elife. 2018 May 30;7. pii: e31879. doi: 10.7554/eLife.31879. PubMed PMID: 29845934; PubMed Central PMCID: PMC5999396.
36	86	2018	29793958	Antonucci JM, Kim SH, St Gelais C, Bonifati S, Li TW, Buzovetsky O, Knecht KM, Duchon AA, Xiong Y, Musier-Forsyth K, Wu L. SAMHD1 Impairs HIV-1 Gene Expression and Negatively Modulates Reactivation of Viral Latency in CD4(+) T Cells. J Virol. 2018 Jul 17;92(15). pii: e00292-18. doi: 10.1128/JVI.00292-18. Print 2018 Aug 1. PubMed PMID: 29793958; PubMed Central PMCID: PMC6052313.
37	86	2018	29792216	Ivanov A, Lin X, Ammosova T, Ilatovskiy AV, Kumari N, Lassiter H, Afangbedji N, Niu X, Petukhov MG, Nekhai S. HIV-1 Tat phosphorylation on Ser-16 residue modulates HIV-1 transcription. Retrovirology. 2018 May 23;15(1):39. doi: 10.1186/s12977-018-0422-5. PubMed PMID: 29792216; PubMed Central PMCID: PMC5966876.
38	PEP	2018	29791798	Sosic A, Saccone I, Carraro C, Kenderdine T, Gamba E, Caliendo G, Corvino A, Di Vaio P, Fiorino F, Magli E, Perissutti E, Santagada V, Severino B, Spada V, Fabris D, Frecentese F, Gatto B. Non-Natural Linker Configuration in 2,6-Dipeptidyl-Anthraquinones Enhances the Inhibition of TAR RNA Binding/Annealing Activities by HIV-1 NC and Tat Proteins. Bioconjug Chem. 2018 Jul 18;29(7):2195-2207. doi: …
39	86	2018	29791506	Xu M, Moresco JJ, Chang M, Mukim A, Smith D, Diedrich JK, Yates JR 3rd, Jones KA. SHMT2 and the BRCC36/BRISC deubiquitinase regulate HIV-1 Tat K63-ubiquitylation and destruction by autophagy. PLoS Pathog. 2018 May 23;14(5):e1007071. doi: 10.1371/journal.ppat.1007071. eCollection 2018 May. PubMed PMID: 29791506; PubMed Central PMCID: PMC5988312.
40	PEP	2018	29780163	Yang Y, Li Q, He QH, Han JS, Su L, Wan Y. Heteromerization of μ-opioid receptor and cholecystokinin B receptor through the third transmembrane domain of the μ-opioid receptor contributes to the anti-opioid effects of cholecystokinin octapeptide. Exp Mol Med. 2018 May 21;50(5):64. doi: 10.1038/s12276-018-0090-5. PubMed PMID: 29780163; PubMed Central PMCID: PMC5960647.
41	86	2018	29775175	Sufiawati I, Tugizov SM. HIV-induced matrix metalloproteinase-9 activation through mitogen-activated protein kinase signalling promotes HSV-1 cell-to-cell spread in oral epithelial cells. J Gen Virol. 2018 Jul;99(7):937-947. doi: 10.1099/jgv.0.001075. Epub 2018 May 18. PubMed PMID: 29775175; PubMed Central PMCID: PMC6537617.
42	86	2018	29773895	Ophinni Y, Inoue M, Kotaki T, Kameoka M. CRISPR/Cas9 system targeting regulatory genes of HIV-1 inhibits viral replication in infected T-cell cultures. Sci Rep. 2018 May 17;8(1):7784. doi: 10.1038/s41598-018-26190-1. PubMed PMID: 29773895; PubMed Central PMCID: PMC5958087.
43	101	2018	29760177	Periyasamy P, Thangaraj A, Guo ML, Hu G, Callen S, Buch S. Epigenetic Promoter DNA Methylation of miR-124 Promotes HIV-1 Tat-Mediated Microglial Activation via MECP2-STAT3 Axis. J Neurosci. 2018 Jun 6;38(23):5367-5383. doi: 10.1523/JNEUROSCI.3474-17.2018. Epub 2018 May 14. PubMed PMID: 29760177; PubMed Central PMCID: PMC5990983.
44	LNS	2018	29754821	Hansen MMK, Wen WY, Ingerman E, Razooky BS, Thompson CE, Dar RD, Chin CW, Simpson ML, Weinberger LS. A Post-Transcriptional Feedback Mechanism for Noise Suppression and Fate Stabilization. Cell. 2018 Jun 14;173(7):1609-1621.e15. doi: 10.1016/j.cell.2018.04.005. Epub 2018 May 10. PubMed PMID: 29754821; PubMed Central PMCID: PMC6044448.
45	101	2018	29751762	Khoury G, Mota TM, Li S, Tumpach C, Lee MY, Jacobson J, Harty L, Anderson JL, Lewin SR, Purcell DFJ. HIV latency reversing agents act through Tat post translational modifications. Retrovirology. 2018 May 11;15(1):36. doi: 10.1186/s12977-018-0421-6. PubMed PMID: 29751762; PubMed Central PMCID: PMC5948896.
46	72, 86, 101	2018	29743356	Mueller N, Pasternak AO, Klaver B, Cornelissen M, Berkhout B, Das AT. The HIV-1 Tat Protein Enhances Splicing at the Major Splice Donor Site. J Virol. 2018 Jun 29;92(14). pii: e01855-17. doi: 10.1128/JVI.01855-17. Print 2018 Jul 15. PubMed PMID: 29743356; PubMed Central PMCID: PMC6026763.
47	LNS	2018	29743242	Mbonye U, Wang B, Gokulrangan G, Shi W, Yang S, Karn J. Cyclin-dependent kinase 7 (CDK7)-mediated phosphorylation of the CDK9 activation loop promotes P-TEFb assembly with Tat and proviral HIV reactivation. J Biol Chem. 2018 Jun 29;293(26):10009-10025. doi: 10.1074/jbc.RA117.001347. Epub 2018 May 9. PubMed PMID: 29743242; PubMed Central PMCID: PMC6028954.
48	72, 101	2018	29743079	Adeyanju K, Bend JR, Rieder MJ, Dekaban GA. HIV-1 tat expression and sulphamethoxazole hydroxylamine mediated oxidative stress alter the disulfide proteome in Jurkat T cells. Virol J. 2018 May 9;15(1):82. doi: 10.1186/s12985-018-0991-x. PubMed PMID: 29743079; PubMed Central PMCID: PMC5944096.
49	72	2018	29737506	Liu Y, Zhou D, Feng J, Liu Z, Hu Y, Liu C, Kong X. HIV-1 Protein Tat(1-72) Impairs Neuronal Dendrites via Activation of PP1 and Regulation of the CREB/BDNF Pathway. Virol Sin. 2018 Jun;33(3):261-269. doi: 10.1007/s12250-018-0031-4. Epub 2018 May 8. PubMed PMID: 29737506; PubMed Central PMCID: PMC6178559.
50	86	2018	29729322	Nookala AR, Schwartz DC, Chaudhari NS, Glazyrin A, Stephens EB, Berman NEJ, Kumar A. Methamphetamine augment HIV-1 Tat mediated memory deficits by altering the expression of synaptic proteins and neurotrophic factors. Brain Behav Immun. 2018 Jul;71:37-51. doi: 10.1016/j.bbi.2018.04.018. Epub 2018 May 2. PubMed PMID: 29729322; PubMed Central PMCID: PMC6003882.
51	86	2018	29728138	Francesconi W, Berton F, Marcondes MCG. HIV-1 Tat alters neuronal intrinsic excitability. BMC Res Notes. 2018 May 4;11(1):275. doi: 10.1186/s13104-018-3376-8. PubMed PMID: 29728138; PubMed Central PMCID: PMC5935945.
52	86	2018	29709610	Kesby JP, Fields JA, Chang A, Coban H, Achim CL, Semenova S; TMARC Group. Effects of HIV-1 TAT protein and methamphetamine exposure on visual discrimination and executive function in mice. Behav Brain Res. 2018 Sep 3;349:73-79. doi: 10.1016/j.bbr.2018.04.046. Epub 2018 Apr 27. PubMed PMID: 29709610; PubMed Central PMCID: PMC6320247.
53	PEP	2018	29707588	Shim BS, Cheon IS, Lee E, Park SM, Choi Y, Jung DI, Yang E, Choi JA, Chun JY, Kim JO, Yun CH, Czerkinsky C, Song MK. Development of Safe and Non-Self-Immunogenic Mucosal Adjuvant by Recombinant Fusion of Cholera Toxin A1 Subunit with Protein Transduction Domain. J Immunol Res. 2018 Mar 7;2018:9830701. doi: 10.1155/2018/9830701. eCollection 2018. PubMed PMID: 29707588; PubMed Central PMCID: PMC586…
54	101	2018	29699604	Jo H, Jang HY, Youn GS, Kim D, Lee CY, Jang JH, Choi SY, Jun JG, Park J. Hindsiipropane B alleviates HIV-1 Tat-induced inflammatory responses by suppressing HDAC6-NADPH oxidase-ROS axis in astrocytes. BMB Rep. 2018 Aug;51(8):394-399. PubMed PMID: 29699604; PubMed Central PMCID: PMC6130829.
55	101	2018	29684085	Li Z, Mbonye U, Feng Z, Wang X, Gao X, Karn J, Zhou Q. The KAT5-Acetyl-Histone4-Brd4 axis silences HIV-1 transcription and promotes viral latency. PLoS Pathog. 2018 Apr 23;14(4):e1007012. doi: 10.1371/journal.ppat.1007012. eCollection 2018 Apr. PubMed PMID: 29684085; PubMed Central PMCID: PMC5933813.
56	86	2018	29666292	Wang X, Duan Z, Yu G, Fan M, Scharff MD. Human Immunodeficiency Virus Tat Protein Aids V Region Somatic Hypermutation in Human B Cells. MBio. 2018 Apr 17;9(2). pii: e02315-17. doi: 10.1128/mBio.02315-17. PubMed PMID: 29666292; PubMed Central PMCID: PMC5904410.
57	72, 86, 101	2018	29654800	van der Kuyl AC, Vink M, Zorgdrager F, Bakker M, Wymant C, Hall M, Gall A, Blanquart F, Berkhout B, Fraser C, Cornelissen M; BEEHIVE Collaboration. The evolution of subtype B HIV-1 tat in the Netherlands during 1985-2012. Virus Res. 2018 May 2;250:51-64. doi: 10.1016/j.virusres.2018.04.008. Epub 2018 Apr 11. PubMed PMID: 29654800.
58	101	2018	29618654	Tang X, Lu H, Dooner M, Chapman S, Quesenberry PJ, Ramratnam B. Exosomal Tat protein activates latent HIV-1 in primary, resting CD4+ T lymphocytes. JCI Insight. 2018 Apr 5;3(7). pii: 95676. doi: 10.1172/jci.insight.95676. eCollection 2018 Apr 5. PubMed PMID: 29618654; PubMed Central PMCID: PMC5928859.
59	86	2018	29595877	Hijmans JG, Stockleman K, Reiakvam W, Levy MV, Brewster LM, Bammert TD, Greiner JJ, Connick E, DeSouza CA. Effects of HIV-1 gp120 and tat on endothelial cell sensescence and senescence-associated microRNAs. Physiol Rep. 2018 Mar;6(6):e13647. doi: 10.14814/phy2.13647. PubMed PMID: 29595877; PubMed Central PMCID: PMC5875545.
60	NAP	2018	29577693	Wang X, Yang Y, Shen S, Wang X, Feng T, Hu Q, Zeng Y. [Tat-based cell-cell fusion method for screening HIV-1 fusion inhibitors]. Sheng Wu Gong Cheng Xue Bao. 2018 Mar 25;34(3):429-439. doi: 10.13345/j.cjb.170268. Chinese. PubMed PMID: 29577693.
61	86	2018	29573741	Sarnelli G, Seguella L, Pesce M, Lu J, Gigli S, Bruzzese E, Lattanzi R, D'Alessandro A, Cuomo R, Steardo L, Esposito G. HIV-1 Tat-induced diarrhea is improved by the PPARalpha agonist, palmitoylethanolamide, by suppressing the activation of enteric glia. J Neuroinflammation. 2018 Mar 24;15(1):94. doi: 10.1186/s12974-018-1126-4. PubMed PMID: 29573741; PubMed Central PMCID: PMC5866515.
62	86	2018	29558961	Khan N, Datta G, Geiger JD, Chen X. Apolipoprotein E isoform dependently affects Tat-mediated HIV-1 LTR transactivation. J Neuroinflammation. 2018 Mar 20;15(1):91. doi: 10.1186/s12974-018-1129-1. PubMed PMID: 29558961; PubMed Central PMCID: PMC5861635.
63	101	2018	29549313	Natarajaseenivasan K, Cotto B, Shanmughapriya S, Lombardi AA, Datta PK, Madesh M, Elrod JW, Khalili K, Langford D. Astrocytic metabolic switch is a novel etiology for Cocaine and HIV-1 Tat-mediated neurotoxicity. Cell Death Dis. 2018 Apr 1;9(4):415. doi: 10.1038/s41419-018-0422-3. PubMed PMID: 29549313; PubMed Central PMCID: PMC5856787.
64	101	2018	29541943	Rustanti L, Jin H, Li D, Lor M, Sivakumaran H, Harrich D. Differential Effects of Strategies to Improve the Transduction Efficiency of Lentiviral Vector that Conveys an Anti-HIV Protein, Nullbasic, in Human T Cells. Virol Sin. 2018 Apr;33(2):142-152. doi: 10.1007/s12250-018-0004-7. Epub 2018 Mar 14. PubMed PMID: 29541943; PubMed Central PMCID: PMC6178113.
65	NTU	2018	29499042	Ndlovu Z, Fajardo E, Mbofana E, Maparo T, Garone D, Metcalf C, Bygrave H, Kao K, Zinyowera S. Multidisease testing for HIV and TB using the GeneXpert platform: A feasibility study in rural Zimbabwe. PLoS One. 2018 Mar 2;13(3):e0193577. doi: 10.1371/journal.pone.0193577. eCollection 2018. PubMed PMID: 29499042; PubMed Central PMCID: PMC5834185.
66	86	2018	29491162	Huan C, Li Z, Ning S, Wang H, Yu XF, Zhang W. Long Noncoding RNA uc002yug.2 Activates HIV-1 Latency through Regulation of mRNA Levels of Various RUNX1 Isoforms and Increased Tat Expression. J Virol. 2018 Apr 13;92(9). pii: e01844-17. doi: 10.1128/JVI.01844-17. Print 2018 May 1. PubMed PMID: 29491162; PubMed Central PMCID: PMC5899182.
67	NTU	2018	29449904	Bogoi RN, de Pablo A, Valencia E, Martín-Carbonero L, Moreno V, Vilchez-Rueda HH, Asensi V, Rodriguez R, Toledano V, Rodés B. Expression profiling of chromatin-modifying enzymes and global DNA methylation in CD4+ T cells from patients with chronic HIV infection at different HIV control and progression states. Clin Epigenetics. 2018 Feb 13;10:20. doi: 10.1186/s13148-018-0448-5. eCollection 2018. P…
68	86	2018	29343578	Abner E, Stoszko M, Zeng L, Chen HC, Izquierdo-Bouldstridge A, Konuma T, Zorita E, Fanunza E, Zhang Q, Mahmoudi T, Zhou MM, Filion GJ, Jordan A. A New Quinoline BRD4 Inhibitor Targets a Distinct Latent HIV-1 Reservoir for Reactivation from Other ""Shock"" Drugs. J Virol. 2018 Apr 27;92(10). pii: e02056-17. doi: 10.1128/JVI.02056-17. Print 2018 May 15. PubMed PMID: 29343578; PubMed Central PMCID: …
69	86	2018	29339801	Wong RW, Lingwood CA, Ostrowski MA, Cabral T, Cochrane A. Cardiac glycoside/aglycones inhibit HIV-1 gene expression by a mechanism requiring MEK1/2-ERK1/2 signaling. Sci Rep. 2018 Jan 16;8(1):850. doi: 10.1038/s41598-018-19298-x. PubMed PMID: 29339801; PubMed Central PMCID: PMC5770468.
70	86, 101	2018	29330881	Cotto B, Natarajaseenivasan K, Ferrero K, Wesley L, Sayre M, Langford D. Cocaine and HIV-1 Tat disrupt cholesterol homeostasis in astrocytes: Implications for HIV-associated neurocognitive disorders in cocaine user patients. Glia. 2018 Apr;66(4):889-902. doi: 10.1002/glia.23291. Epub 2018 Jan 13. PubMed PMID: 29330881; PubMed Central PMCID: PMC5769965.
71	NTU	2018	29321323	Evans EL 3rd, Becker JT, Fricke SL, Patel K, Sherer NM. HIV-1 Vif's Capacity To Manipulate the Cell Cycle Is Species Specific. J Virol. 2018 Mar 14;92(7). pii: e02102-17. doi: 10.1128/JVI.02102-17. Print 2018 Apr 1. PubMed PMID: 29321323; PubMed Central PMCID: PMC5972884.
72	86	2018	29266200	Wang R, Zhang X, Ding H, Qiao Y, Han X, Geng W, Guan G, Cui H, Zhao B, Wu Y, Liang G, Shang H. AID recruits the RNA exosome to degrade HIV-1 nascent transcripts through interaction with the Tat-P-TEFb-TAR RNP complex. FEBS Lett. 2018 Jan;592(2):284-294. doi: 10.1002/1873-3468.12954. Epub 2018 Jan 5. PubMed PMID: 29266200.
73	101	2018	29220699	El-Amine R, Germini D, Zakharova VV, Tsfasman T, Sheval EV, Louzada RAN, Dupuy C, Bilhou-Nabera C, Hamade A, Najjar F, Oksenhendler E, Lipinski M, Chernyak BV, Vassetzky YS. HIV-1 Tat protein induces DNA damage in human peripheral blood B-lymphocytes via mitochondrial ROS production. Redox Biol. 2018 May;15:97-108. doi: 10.1016/j.redox.2017.11.024. Epub 2017 Dec 7. PubMed PMID: 29220699; PubMed C…
74	LNS	2017	29212213	Pan H, Lu P, Shen Y, Wang Y, Jiang Z, Yang X, Zhong Y, Yang H, Khan IU, Zhou M, Li B, Zhang Z, Xu J, Lu H, Zhu H. The bromodomain and extraterminal domain inhibitor bromosporine synergistically reactivates latent HIV-1 in latently infected cells. Oncotarget. 2017 Oct 6;8(55):94104-94116. doi: 10.18632/oncotarget.21585. eCollection 2017 Nov 7. PubMed PMID: 29212213; PubMed Central PMCID: PMC570685…
75	LNS	2017	29192216	Lu P, Shen Y, Yang H, Wang Y, Jiang Z, Yang X, Zhong Y, Pan H, Xu J, Lu H, Zhu H. BET inhibitors RVX-208 and PFI-1 reactivate HIV-1 from latency. Sci Rep. 2017 Nov 30;7(1):16646. doi: 10.1038/s41598-017-16816-1. PubMed PMID: 29192216; PubMed Central PMCID: PMC5709369.
76	NTU	2017	29171193	Saito S, Duong YT, Metz M, Lee K, Patel H, Sleeman K, Manjengwa J, Ogollah FM, Kasongo W, Mitchell R, Mugurungi O, Chimbwandira F, Moyo C, Maliwa V, Mtengo H, Nkumbula T, Ndongmo CB, Vere NS, Chipungu G, Parekh BS, Justman J, Voetsch AC. Returning HIV-1 viral load results to participant-selected health facilities in national Population-based HIV Impact Assessment (PHIA) household surveys in three…
77	86	2017	29162980	Liu Y, Nonnemacher MR, Alexaki A, Pirrone V, Banerjee A, Li L, Kilareski E, Wigdahl B. Functional Studies of CCAAT/Enhancer Binding Protein Site Located Downstream of the Transcriptional Start Site. Clin Med Insights Pathol. 2017 Nov 15;10:1179555717694556. doi: 10.1177/1179555717694556. eCollection 2017. PubMed PMID: 29162980; PubMed Central PMCID: PMC5692137.
78	NTU	2017	29147885	Hu G, Yelamanchili S, Kashanchi F, Haughey N, Bond VC, Witwer KW, Pulliam L, Buch S. Proceedings of the 2017 ISEV symposium on ""HIV, NeuroHIV, drug abuse, & EVs"". J Neurovirol. 2017 Dec;23(6):935-940. doi: 10.1007/s13365-017-0599-8. Epub 2017 Nov 16. PubMed PMID: 29147885; PubMed Central PMCID: PMC6314188.
79	86	2018	29146238	Gonek M, McLane VD, Stevens DL, Lippold K, Akbarali HI, Knapp PE, Dewey WL, Hauser KF, Paris JJ. CCR5 mediates HIV-1 Tat-induced neuroinflammation and influences morphine tolerance, dependence, and reward. Brain Behav Immun. 2018 Mar;69:124-138. doi: 10.1016/j.bbi.2017.11.006. Epub 2017 Nov 13. PubMed PMID: 29146238; PubMed Central PMCID: PMC5857418.
80	86	2018	29143286	Langford D, Oh Kim B, Zou W, Fan Y, Rahimain P, Liu Y, He JJ. Doxycycline-inducible and astrocyte-specific HIV-1 Tat transgenic mice (iTat) as an HIV/neuroAIDS model. J Neurovirol. 2018 Apr;24(2):168-179. doi: 10.1007/s13365-017-0598-9. Epub 2017 Nov 15. PubMed PMID: 29143286; PubMed Central PMCID: PMC6444363.
81	NTU	2017	29138333	Yoon CH, Kim SY, Byeon SE, Jeong Y, Lee J, Kim KP, Park J, Bae YS. Correction for Yoon et al., ""p53-Derived Host Restriction of HIV-1 Replication by Protein Kinase R-Mediated Tat Phosphorylation and Inactivation"". J Virol. 2017 Nov 14;91(23). pii: e01561-17. doi: 10.1128/JVI.01561-17. Print 2017 Dec 1. PubMed PMID: 29138333; PubMed Central PMCID: PMC5686746.
82	101	2017	29114997	Campbell LA, Richie CT, Zhang Y, Heathward EJ, Coke LM, Park EY, Harvey BK. In vitro modeling of HIV proviral activity in microglia. FEBS J. 2017 Dec;284(23):4096-4114. doi: 10.1111/febs.14293. Epub 2017 Nov 8. PubMed PMID: 29114997; PubMed Central PMCID: PMC5835391.
83	86	2018	29111178	Fitting S, McLaurin KA, Booze RM, Mactutus CF. Dose-dependent neurocognitive deficits following postnatal day 10 HIV-1 viral protein exposure: Relationship to hippocampal anatomy parameters. Int J Dev Neurosci. 2018 Apr;65:66-82. doi: 10.1016/j.ijdevneu.2017.10.009. Epub 2017 Oct 27. PubMed PMID: 29111178; PubMed Central PMCID: PMC5889695.
84	NTU	2017	29098230	Pezzi HM, Berry SM, Beebe DJ, Striker R. RNA-mediated TILDA for improved cell capacity and enhanced detection of multiply-spliced HIV RNA. Integr Biol (Camb). 2017 Nov 13;9(11):876-884. doi: 10.1039/c7ib00112f. PubMed PMID: 29098230; PubMed Central PMCID: PMC5733636.
85	LNS	2018	29077949	Pang KM, Castanotto D, Li H, Scherer L, Rossi JJ. Incorporation of aptamers in the terminal loop of shRNAs yields an effective and novel combinatorial targeting strategy. Nucleic Acids Res. 2018 Jan 9;46(1):e6. doi: 10.1093/nar/gkx980. PubMed PMID: 29077949; PubMed Central PMCID: PMC5758892.
86	NTU	2018	29063514	de Almeida SM, Ribeiro CE, Rotta I, Piovesan M, Tang B, Vaida F, Raboni SM, Letendre S, Potter M, Batistela Fernandes MS, Ellis RJ; HIV Neurobehavioral Research Center (HNRC) Group. Biomarkers of neuronal injury and amyloid metabolism in the cerebrospinal fluid of patients infected with HIV-1 subtypes B and C. J Neurovirol. 2018 Feb;24(1):28-40. doi: 10.1007/s13365-017-0591-3. Epub 2017 Oct 23. P…
87	NTU	2017	29045830	Kessing CF, Nixon CC, Li C, Tsai P, Takata H, Mousseau G, Ho PT, Honeycutt JB, Fallahi M, Trautmann L, Garcia JV, Valente ST. In Vivo Suppression of HIV Rebound by Didehydro-Cortistatin A, a ""Block-and-Lock"" Strategy for HIV-1 Treatment. Cell Rep. 2017 Oct 17;21(3):600-611. doi: 10.1016/j.celrep.2017.09.080. PubMed PMID: 29045830; PubMed Central PMCID: PMC5653276.
88	86	2017	29045398	Razooky BS, Cao Y, Hansen MMK, Perelson AS, Simpson ML, Weinberger LS. Nonlatching positive feedback enables robust bimodality by decoupling expression noise from the mean. PLoS Biol. 2017 Oct 18;15(10):e2000841. doi: 10.1371/journal.pbio.2000841. eCollection 2017 Oct. PubMed PMID: 29045398; PubMed Central PMCID: PMC5646755.
89	NTU	2017	29037489	Eilebrecht S, Benecke BJ, Benecke AG. Latent HIV-1 TAR Regulates 7SK-responsive P-TEFb Target Genes and Targets Cellular Immune Responses in the Absence of Tat. Genomics Proteomics Bioinformatics. 2017 Oct;15(5):313-323. doi: 10.1016/j.gpb.2017.05.003. Epub 2017 Oct 14. PubMed PMID: 29037489; PubMed Central PMCID: PMC5673678.
90	72, 86, 101	2017	28968466	Sánchez-Del Cojo M, López-Huertas MR, Díez-Fuertes F, Rodríguez-Mora S, Bermejo M, López-Campos G, Mateos E, Jiménez-Tormo L, Gómez-Esquer F, Díaz-Gil G, Alcamí J, Coiras M. Changes in the cellular microRNA profile by the intracellular expression of HIV-1 Tat regulator: A potential mechanism for resistance to apoptosis and impaired proliferation in HIV-1 infected CD4+ T cells. PLoS One. 2017 Oct …
91	LNS	2017	28931520	Li SS, Kochar NK, Elizaga M, Hay CM, Wilson GJ, Cohen KW, De Rosa SC, Xu R, Ota-Setlik A, Morris D, Finak G, Allen M, Tieu HV, Frank I, Sobieszczyk ME, Hannaman D, Gottardo R, Gilbert PB, Tomaras GD, Corey L, Clarke DK, Egan MA, Eldridge JH, McElrath MJ, Frahm N; NIAID HIV Vaccine Trials Network. DNA Priming Increases Frequency of T-Cell Responses to a Vesicular Stomatitis Virus HIV Vaccine with …
92	PEP	2017	28928217	Majdoul S, Cosette J, Seye AK, Bernard E, Frin S, Holic N, Chazal N, Briant L, Espert L, Galy A, Fenard D. Peptides derived from evolutionarily conserved domains in Beclin-1 and Beclin-2 enhance the entry of lentiviral vectors into human cells. J Biol Chem. 2017 Nov 10;292(45):18672-18681. doi: 10.1074/jbc.M117.800813. Epub 2017 Sep 19. PubMed PMID: 28928217; PubMed Central PMCID: PMC5682973.
93	86	2017	28893794	Patel S, Leibrand CR, Palasuberniam P, Couraud PO, Weksler B, Jahr FM, McClay JL, Hauser KF, McRae M. Effects of HIV-1 Tat and Methamphetamine on Blood-Brain Barrier Integrity and Function In Vitro. Antimicrob Agents Chemother. 2017 Nov 22;61(12). pii: e01307-17. doi: 10.1128/AAC.01307-17. Print 2017 Dec. PubMed PMID: 28893794; PubMed Central PMCID: PMC5700307.
94	NTU	2017	28884263	Prezioso C, Scribano D, Bellizzi A, Anzivino E, Rodio DM, Trancassini M, Palamara AT, Pietropaolo V. Efficient propagation of archetype JC polyomavirus in COS-7 cells: evaluation of rearrangements within the NCCR structural organization after transfection. Arch Virol. 2017 Dec;162(12):3745-3752. doi: 10.1007/s00705-017-3542-7. Epub 2017 Sep 7. PubMed PMID: 28884263; PubMed Central PMCID: PMC56715…
95	LNS	2017	28878233	Wu J, Ao MT, Shao R, Wang HR, Yu D, Fang MJ, Gao X, Wu Z, Zhou Q, Xue YH. A chalcone derivative reactivates latent HIV-1 transcription through activating P-TEFb and promoting Tat-SEC interaction on viral promoter. Sci Rep. 2017 Sep 6;7(1):10657. doi: 10.1038/s41598-017-10728-w. PubMed PMID: 28878233; PubMed Central PMCID: PMC5587564.
96	86	2017	28848502	Ronsard L, Rai T, Rai D, Ramachandran VG, Banerjea AC. In silico Analyses of Subtype Specific HIV-1 Tat-TAR RNA Interaction Reveals the Structural Determinants for Viral Activity. Front Microbiol. 2017 Aug 8;8:1467. doi: 10.3389/fmicb.2017.01467. eCollection 2017. PubMed PMID: 28848502; PubMed Central PMCID: PMC5550727.
97	86	2017	28842263	Hayashi T, Jean M, Huang H, Simpson S, Santoso NG, Zhu J. Screening of an FDA-approved compound library identifies levosimendan as a novel anti-HIV-1 agent that inhibits viral transcription. Antiviral Res. 2017 Oct;146:76-85. doi: 10.1016/j.antiviral.2017.08.013. Epub 2017 Aug 24. PubMed PMID: 28842263; PubMed Central PMCID: PMC5654649.
98	86	2017	28817720	Medina-Moreno S, Dowling TC, Zapata JC, Le NM, Sausville E, Bryant J, Redfield RR, Heredia A. Targeting of CDK9 with indirubin 3'-monoxime safely and durably reduces HIV viremia in chronically infected humanized mice. PLoS One. 2017 Aug 17;12(8):e0183425. doi: 10.1371/journal.pone.0183425. eCollection 2017. PubMed PMID: 28817720; PubMed Central PMCID: PMC5560554.
99	86	2017	28798420	Esposito G, Capoccia E, Gigli S, Pesce M, Bruzzese E, D'Alessandro A, Cirillo C, di Cerbo A, Cuomo R, Seguella L, Steardo L, Sarnelli G. HIV-1 Tat-induced diarrhea evokes an enteric glia-dependent neuroinflammatory response in the central nervous system. Sci Rep. 2017 Aug 10;7(1):7735. doi: 10.1038/s41598-017-05245-9. PubMed PMID: 28798420; PubMed Central PMCID: PMC5552820.
100	86	2017	28798382	Dickens AM, Yoo SW, Chin AC, Xu J, Johnson TP, Trout AL, Hauser KF, Haughey NJ. Chronic low-level expression of HIV-1 Tat promotes a neurodegenerative phenotype with aging. Sci Rep. 2017 Aug 10;7(1):7748. doi: 10.1038/s41598-017-07570-5. PubMed PMID: 28798382; PubMed Central PMCID: PMC5552766.
101	NTU	2017	28785172	Mancone C, Grimaldi A, Refolo G, Abbate I, Rozera G, Benelli D, Fimia GM, Barnaba V, Tripodi M, Piacentini M, Ciccosanti F. Iron overload down-regulates the expression of the HIV-1 Rev cofactor eIF5A in infected T lymphocytes. Proteome Sci. 2017 Aug 4;15:18. doi: 10.1186/s12953-017-0126-0. eCollection 2017. PubMed PMID: 28785172; PubMed Central PMCID: PMC5545036.
102	PEP	2017	28775288	Thangaretnam KP, Gopisetty G, Ramanathan P, Rajkumar T. A polypeptide from the junction region sequence of EWS-FLI1 inhibits Ewing's sarcoma cells, interacts with the EWS-FLI1 and partner proteins. Sci Rep. 2017 Aug 3;7(1):7172. doi: 10.1038/s41598-017-07482-4. PubMed PMID: 28775288; PubMed Central PMCID: PMC5543137.
103	86	2017	28768867	Nasr N, Alshehri AA, Wright TK, Shahid M, Heiner BM, Harman AN, Botting RA, Helbig KJ, Beard MR, Suzuki K, Kelleher AD, Hertzog P, Cunningham AL. Mechanism of Interferon-Stimulated Gene Induction in HIV-1-Infected Macrophages. J Virol. 2017 Sep 27;91(20). pii: e00744-17. doi: 10.1128/JVI.00744-17. Print 2017 Oct 15. PubMed PMID: 28768867; PubMed Central PMCID: PMC5625512.
104	PEP	2017	28767512	Moutal A, Wang Y, Yang X, Ji Y, Luo S, Dorame A, Bellampalli SS, Chew LA, Cai S, Dustrude ET, Keener JE, Marty MT, Vanderah TW, Khanna R. Dissecting the role of the CRMP2-neurofibromin complex on pain behaviors. Pain. 2017 Nov;158(11):2203-2221. doi: 10.1097/j.pain.0000000000001026. PubMed PMID: 28767512; PubMed Central PMCID: PMC6359908.
105	86	2017	28733129	Xu C, Hermes DJ, Nwanguma B, Jacobs IR, Mackie K, Mukhopadhyay S, Lichtman AH, Ignatowska-Jankowska B, Fitting S. Endocannabinoids exert CB(1) receptor-mediated neuroprotective effects in models of neuronal damage induced by HIV-1 Tat protein. Mol Cell Neurosci. 2017 Sep;83:92-102. doi: 10.1016/j.mcn.2017.07.003. Epub 2017 Jul 19. PubMed PMID: 28733129; PubMed Central PMCID: PMC5587778.
106	SIV	2017	28732035	Martins MA, Shin YC, Gonzalez-Nieto L, Domingues A, Gutman MJ, Maxwell HS, Castro I, Magnani DM, Ricciardi M, Pedreño-Lopez N, Bailey V, Betancourt D, Altman JD, Pauthner M, Burton DR, von Bredow B, Evans DT, Yuan M, Parks CL, Ejima K, Allison DB, Rakasz E, Barber GN, Capuano S 3rd, Lifson JD, Desrosiers RC, Watkins DI. Vaccine-induced immune responses against both Gag and Env improve control of …
107	PEP	2017	28730445	Tian K, Shi R, Gu A, Pennella M, Gu LQ. Polycationic Probe-Guided Nanopore Single-Molecule Counter for Selective miRNA Detection. Methods Mol Biol. 2017;1632:255-268. doi: 10.1007/978-1-4939-7138-1_17. PubMed PMID: 28730445; PubMed Central PMCID: PMC6157729.
108	PEP	2017	28717424	Sutaria DS, Jiang J, Elgamal OA, Pomeroy SM, Badawi M, Zhu X, Pavlovicz R, Azevedo-Pouly ACP, Chalmers J, Li C, Phelps MA, Schmittgen TD. Low active loading of cargo into engineered extracellular vesicles results in inefficient miRNA mimic delivery. J Extracell Vesicles. 2017 Jun 14;6(1):1333882. doi: 10.1080/20013078.2017.1333882. eCollection 2017. PubMed PMID: 28717424; PubMed Central PMCID: PM…
109	86	2017	28716964	Raybuck JD, Hargus NJ, Thayer SA. A GluN2B-Selective NMDAR Antagonist Reverses Synapse Loss and Cognitive Impairment Produced by the HIV-1 Protein Tat. J Neurosci. 2017 Aug 16;37(33):7837-7847. doi: 10.1523/JNEUROSCI.0226-17.2017. Epub 2017 Jul 17. PubMed PMID: 28716964; PubMed Central PMCID: PMC5559761.
110	86	2017	28645727	Agostini S, Ali H, Vardabasso C, Fittipaldi A, Tasciotti E, Cereseto A, Bugatti A, Rusnati M, Lusic M, Giacca M. Inhibition of Non Canonical HIV-1 Tat Secretion Through the Cellular Na(+),K(+)-ATPase Blocks HIV-1 Infection. EBioMedicine. 2017 Jul;21:170-181. doi: 10.1016/j.ebiom.2017.06.011. Epub 2017 Jun 13. PubMed PMID: 28645727; PubMed Central PMCID: PMC5514404.
111	86	2017	28638377	Huang H, Liu S, Jean M, Simpson S, Huang H, Merkley M, Hayashi T, Kong W, Rodríguez-Sánchez I, Zhang X, Yosief HO, Miao H, Que J, Kobie JJ, Bradner J, Santoso NG, Zhang W, Zhu J. A Novel Bromodomain Inhibitor Reverses HIV-1 Latency through Specific Binding with BRD4 to Promote Tat and P-TEFb Association. Front Microbiol. 2017 Jun 7;8:1035. doi: 10.3389/fmicb.2017.01035. eCollection 2017. PubMed P…
112	86	2017	28623807	Brailoiu GC, Deliu E, Barr JL, Console-Bram LM, Ciuciu AM, Abood ME, Unterwald EM, Brailoiu E. HIV Tat excites D1 receptor-like expressing neurons from rat nucleus accumbens. Drug Alcohol Depend. 2017 Sep 1;178:7-14. doi: 10.1016/j.drugalcdep.2017.04.015. Epub 2017 Jun 8. PubMed PMID: 28623807; PubMed Central PMCID: PMC5797705.
113	86	2017	28623359	Sun WL, Quizon PM, Yuan Y, Zhang W, Ananthan S, Zhan CG, Zhu J. Allosteric modulatory effects of SRI-20041 and SRI-30827 on cocaine and HIV-1 Tat protein binding to human dopamine transporter. Sci Rep. 2017 Jun 16;7(1):3694. doi: 10.1038/s41598-017-03771-0. PubMed PMID: 28623359; PubMed Central PMCID: PMC5473888.
114	LNS	2017	28603746	Cambon K, Zimmer V, Martineau S, Gaillard MC, Jarrige M, Bugi A, Miniarikova J, Rey M, Hassig R, Dufour N, Auregan G, Hantraye P, Perrier AL, Déglon N. Preclinical Evaluation of a Lentiviral Vector for Huntingtin Silencing. Mol Ther Methods Clin Dev. 2017 May 11;5:259-276. doi: 10.1016/j.omtm.2017.05.001. eCollection 2017 Jun 16. PubMed PMID: 28603746; PubMed Central PMCID: PMC5453866.
115	NTU	2017	28591597	Wollman R. Single-Molecule Threshold of HIV Fate Decision. Biophys J. 2017 Jun 6;112(11):2247-2248. doi: 10.1016/j.bpj.2017.03.041. PubMed PMID: 28591597; PubMed Central PMCID: PMC5474877.
116	NTU	2017	28555140	Forlani G, Tosi G, Turrini F, Poli G, Vicenzi E, Accolla RS. Tripartite Motif-Containing Protein 22 Interacts with Class II Transactivator and Orchestrates Its Recruitment in Nuclear Bodies Containing TRIM19/PML and Cyclin T1. Front Immunol. 2017 May 15;8:564. doi: 10.3389/fimmu.2017.00564. eCollection 2017. PubMed PMID: 28555140; PubMed Central PMCID: PMC5430032.
117	86	2017	28553432	Jiang W, Huang W, Chen Y, Zou M, Peng D, Chen D. HIV-1 Transactivator Protein Induces ZO-1 and Neprilysin Dysfunction in Brain Endothelial Cells via the Ras Signaling Pathway. Oxid Med Cell Longev. 2017;2017:3160360. doi: 10.1155/2017/3160360. Epub 2017 May 2. PubMed PMID: 28553432; PubMed Central PMCID: PMC5434241.
118	101	2017	28550120	Staitieh BS, Ding L, Neveu WA, Spearman P, Guidot DM, Fan X. HIV-1 decreases Nrf2/ARE activity and phagocytic function in alveolar macrophages. J Leukoc Biol. 2017 Aug;102(2):517-525. doi: 10.1189/jlb.4A0616-282RR. Epub 2017 May 26. PubMed PMID: 28550120; PubMed Central PMCID: PMC5505750.
119	101	2017	28539656	Serrero M, Planès R, Bahraoui E. PKC-δ isoform plays a crucial role in Tat-TLR4 signalling pathway to activate NF-κB and CXCL8 production. Sci Rep. 2017 May 24;7(1):2384. doi: 10.1038/s41598-017-02468-8. PubMed PMID: 28539656; PubMed Central PMCID: PMC5443767.
120	86	2017	28499252	Youn GS, Cho H, Kim D, Choi SY, Park J. Crosstalk between HDAC6 and Nox2-based NADPH oxidase mediates HIV-1 Tat-induced pro-inflammatory responses in astrocytes. Redox Biol. 2017 Aug;12:978-986. doi: 10.1016/j.redox.2017.05.001. Epub 2017 May 4. PubMed PMID: 28499252; PubMed Central PMCID: PMC5429231.
121	86	2017	28495611	Kesby JP, Najera JA, Romoli B, Fang Y, Basova L, Birmingham A, Marcondes MCG, Dulcis D, Semenova S. HIV-1 TAT protein enhances sensitization to methamphetamine by affecting dopaminergic function. Brain Behav Immun. 2017 Oct;65:210-221. doi: 10.1016/j.bbi.2017.05.004. Epub 2017 May 8. PubMed PMID: 28495611; PubMed Central PMCID: PMC5537017.
122	LNS	2018	28493473	Tahrir FG, Shanmughapriya S, Ahooyi TM, Knezevic T, Gupta MK, Kontos CD, McClung JM, Madesh M, Gordon J, Feldman AM, Cheung JY, Khalili K. Dysregulation of mitochondrial bioenergetics and quality control by HIV-1 Tat in cardiomyocytes. J Cell Physiol. 2018 Feb;233(2):748-758. doi: 10.1002/jcp.26002. Epub 2017 Jul 31. PubMed PMID: 28493473; PubMed Central PMCID: PMC5673531.
123	NTU	2017	28491017	Maubert ME, Wigdahl B, Nonnemacher MR. Opinion: Inhibition of Blood-Brain Barrier Repair as a Mechanism in HIV-1 Disease. Front Neurosci. 2017 Apr 26;11:228. doi: 10.3389/fnins.2017.00228. eCollection 2017. PubMed PMID: 28491017; PubMed Central PMCID: PMC5405129.
124	PEP	2017	28490747	Smith KM, Himiari Z, Tsimbalyuk S, Forwood JK. Structural Basis for Importin-α Binding of the Human Immunodeficiency Virus Tat. Sci Rep. 2017 May 10;7(1):1650. doi: 10.1038/s41598-017-01853-7. PubMed PMID: 28490747; PubMed Central PMCID: PMC5431807.
125	72, 86	2017	28484443	Ronsard L, Ganguli N, Singh VK, Mohankumar K, Rai T, Sridharan S, Pajaniradje S, Kumar B, Rai D, Chaudhuri S, Coumar MS, Ramachandran VG, Banerjea AC. Impact of Genetic Variations in HIV-1 Tat on LTR-Mediated Transcription via TAR RNA Interaction. Front Microbiol. 2017 Apr 21;8:706. doi: 10.3389/fmicb.2017.00706. eCollection 2017. PubMed PMID: 28484443; PubMed Central PMCID: PMC5399533.
126	86	2017	28473642	Schier CJ, Marks WD, Paris JJ, Barbour AJ, McLane VD, Maragos WF, McQuiston AR, Knapp PE, Hauser KF. Selective Vulnerability of Striatal D2 versus D1 Dopamine Receptor-Expressing Medium Spiny Neurons in HIV-1 Tat Transgenic Male Mice. J Neurosci. 2017 Jun 7;37(23):5758-5769. doi: 10.1523/JNEUROSCI.0622-17.2017. Epub 2017 May 4. PubMed PMID: 28473642; PubMed Central PMCID: PMC5469310.
127	86	2017	28468838	Raja R, Ronsard L, Lata S, Trivedi S, Banerjea AC. HIV-1 Tat potently stabilises Mdm2 and enhances viral replication. Biochem J. 2017 Jul 11;474(14):2449-2464. doi: 10.1042/BCJ20160825. Erratum in: Biochem J. 2017 Nov 9;474(22):3869. PubMed PMID: 28468838; PubMed Central PMCID: PMC5509382.
128	LNS	2017	28462923	Bohn-Wippert K, Tevonian EN, Megaridis MR, Dar RD. Similarity in viral and host promoters couples viral reactivation with host cell migration. Nat Commun. 2017 May 2;8:15006. doi: 10.1038/ncomms15006. PubMed PMID: 28462923; PubMed Central PMCID: PMC5418578.
129	PEP	2017	28450931	Fan YX, Liang ZX, Liu QZ, Xiao H, Li KB, Wu JZ. Cell penetrating peptide of sodium-iodide symporter effect on the I-131 radiotherapy on thyroid cancer. Exp Ther Med. 2017 Mar;13(3):989-994. doi: 10.3892/etm.2017.4079. Epub 2017 Jan 23. PubMed PMID: 28450931; PubMed Central PMCID: PMC5403560.
130	86	2017	28446240	Monde K, Terasawa H, Nakano Y, Soheilian F, Nagashima K, Maeda Y, Ono A. Molecular mechanisms by which HERV-K Gag interferes with HIV-1 Gag assembly and particle infectivity. Retrovirology. 2017 Apr 26;14(1):27. doi: 10.1186/s12977-017-0351-8. PubMed PMID: 28446240; PubMed Central PMCID: PMC5406883.
131	NTU	2017	28436127	Whitmill A, Liu Y, Timani KA, Niu Y, He JJ. Tip110 Deletion Impaired Embryonic and Stem Cell Development Involving Downregulation of Stem Cell Factors Nanog, Oct4, and Sox2. Stem Cells. 2017 Jul;35(7):1674-1686. doi: 10.1002/stem.2631. Epub 2017 May 7. PubMed PMID: 28436127.
132	86	2017	28431135	Brogie JE, Price DH. Reconstitution of a functional 7SK snRNP. Nucleic Acids Res. 2017 Jun 20;45(11):6864-6880. doi: 10.1093/nar/gkx262. PubMed PMID: 28431135; PubMed Central PMCID: PMC5499737.
133	86	2017	28418268	Kim JM, Choi HS, Seong BL. The folding competence of HIV-1 Tat mediated by interaction with TAR RNA. RNA Biol. 2017 Jul 3;14(7):926-937. doi: 10.1080/15476286.2017.1311455. Epub 2017 Apr 18. PubMed PMID: 28418268; PubMed Central PMCID: PMC5546542.
134	LNS	2017	28386076	Zhang W, Morshed MM, Noyan K, Russom A, Sönnerborg A, Neogi U. Quantitative humoral profiling of the HIV-1 proteome in elite controllers and patients with very long-term efficient antiretroviral therapy. Sci Rep. 2017 Apr 6;7(1):666. doi: 10.1038/s41598-017-00759-8. PubMed PMID: 28386076; PubMed Central PMCID: PMC5429677.
135	LNS	2017	28368303	Jean MJ, Power D, Kong W, Huang H, Santoso N, Zhu J. Identification of HIV-1 Tat-Associated Proteins Contributing to HIV-1 Transcription and Latency. Viruses. 2017 Apr 1;9(4). pii: E67. doi: 10.3390/v9040067. PubMed PMID: 28368303; PubMed Central PMCID: PMC5408673.
136	86	2017	28345603	Faust TB, Li Y, Jang GM, Johnson JR, Yang S, Weiss A, Krogan NJ, Frankel AD. PJA2 ubiquitinates the HIV-1 Tat protein with atypical chain linkages to activate viral transcription. Sci Rep. 2017 Mar 27;7:45394. doi: 10.1038/srep45394. PubMed PMID: 28345603; PubMed Central PMCID: PMC5366948.
137	LNS	2017	28340332	Kuzmina A, Krasnopolsky S, Taube R. Super elongation complex promotes early HIV transcription and its function is modulated by P-TEFb. Transcription. 2017 May 27;8(3):133-149. doi: 10.1080/21541264.2017.1295831. Epub 2017 Feb 17. PubMed PMID: 28340332; PubMed Central PMCID: PMC5501376.
138	LNS	2017	28322550	Meyer NO, O'Donoghue AJ, Schulze-Gahmen U, Ravalin M, Moss SM, Winter MB, Knudsen GM, Craik CS. Multiplex Substrate Profiling by Mass Spectrometry for Kinases as a Method for Revealing Quantitative Substrate Motifs. Anal Chem. 2017 Apr 18;89(8):4550-4558. doi: 10.1021/acs.analchem.6b05002. Epub 2017 Apr 4. PubMed PMID: 28322550; PubMed Central PMCID: PMC5500290.
139	86, 101	2017	28288662	Rustanti L, Jin H, Lor M, Lin MH, Rawle DJ, Harrich D. A mutant Tat protein inhibits infection of human cells by strains from diverse HIV-1 subtypes. Virol J. 2017 Mar 14;14(1):52. doi: 10.1186/s12985-017-0705-9. PubMed PMID: 28288662; PubMed Central PMCID: PMC5348743.
140	101	2017	28270571	Chivero ET, Guo ML, Periyasamy P, Liao K, Callen SE, Buch S. HIV-1 Tat Primes and Activates Microglial NLRP3 Inflammasome-Mediated Neuroinflammation. J Neurosci. 2017 Mar 29;37(13):3599-3609. doi: 10.1523/JNEUROSCI.3045-16.2017. Epub 2017 Mar 7. PubMed PMID: 28270571; PubMed Central PMCID: PMC5373137.
141	LNS	2017	28239658	Peterson CW, Benne C, Polacino P, Kaur J, McAllister CE, Filali-Mouhim A, Obenza W, Pecor TA, Huang ML, Baldessari A, Murnane RD, Woolfrey AE, Jerome KR, Hu SL, Klatt NR, DeRosa S, Sékaly RP, Kiem HP. Loss of immune homeostasis dictates SHIV rebound after stem-cell transplantation. JCI Insight. 2017 Feb 23;2(4):e91230. doi: 10.1172/jci.insight.91230. PubMed PMID: 28239658; PubMed Central PMCID: P…
142	LNS	2017	28218730	Olmedo DA, López-Pérez JL, Del Olmo E, Bedoya LM, Sancho R, Alcamí J, Muñoz E, Feliciano AS, Gupta MP. Neoflavonoids as Inhibitors of HIV-1 Replication by Targeting the Tat and NF-κB Pathways. Molecules. 2017 Feb 19;22(2). pii: E321. doi: 10.3390/molecules22020321. PubMed PMID: 28218730; PubMed Central PMCID: PMC6155902.
143	PEP	2017	28208588	Lin CY, Huang JY, Lo LW. Depicting Binding-Mediated Translocation of HIV-1 Tat Peptides in Living Cells with Nanoscale Pens of Tat-Conjugated Quantum Dots. Sensors (Basel). 2017 Feb 10;17(2). pii: E315. doi: 10.3390/s17020315. PubMed PMID: 28208588; PubMed Central PMCID: PMC5335923.
144	86	2017	28193275	Chen S, Yang X, Cheng W, Ma Y, Shang Y, Cao L, Chen S, Chen Y, Wang M, Guo D. Immune regulator ABIN1 suppresses HIV-1 transcription by negatively regulating the ubiquitination of Tat. Retrovirology. 2017 Feb 13;14(1):12. doi: 10.1186/s12977-017-0338-5. PubMed PMID: 28193275; PubMed Central PMCID: PMC5304394.
145	LNS	2017	28179527	Yue FY, Cohen JC, Ho M, Rahman AKMN, Liu J, Mujib S, Saiyed A, Hundal S, Khozin A, Bonner P, Liu D, Benko E, Kovacs C, Ostrowski M. HIV-Specific Granzyme B-Secreting but Not Gamma Interferon-Secreting T Cells Are Associated with Reduced Viral Reservoirs in Early HIV Infection. J Virol. 2017 Mar 29;91(8). pii: e02233-16. doi: 10.1128/JVI.02233-16. Print 2017 Apr 15. PubMed PMID: 28179527; PubMed C…
146	86	2017	28178646	Wang J, Zhang Y, Xu Q, Qiu J, Zheng H, Ye X, Xue Y, Yin Y, Zhang Z, Liu Y, Hao Y, Wei Q, Wang W, Mori K, Izumo S, Kubota R, Shao Y, Xing HQ. Menin mediates Tat-induced neuronal apoptosis in brain frontal cortex of SIV-infected macaques and in Tat-treated cells. Oncotarget. 2017 Mar 14;8(11):18082-18094. doi: 10.18632/oncotarget.14993. PubMed PMID: 28178646; PubMed Central PMCID: PMC5392309.
147	101	2017	28167698	Chukwurah E, Handy I, Patel RC. ADAR1 and PACT contribute to efficient translation of transcripts containing HIV-1 trans-activating response (TAR) element. Biochem J. 2017 Mar 23;474(7):1241-1257. doi: 10.1042/BCJ20160964. PubMed PMID: 28167698; PubMed Central PMCID: PMC5363390.
148	PEP	2017	28154562	Kulkarni A, Kurle S, Shete A, Ghate M, Godbole S, Madhavi V, Kent SJ, Paranjape R, Thakar M. Indian Long-term Non-Progressors Show Broad ADCC Responses with Preferential Recognition of V3 Region of Envelope and a Region from Tat Protein. Front Immunol. 2017 Jan 19;8:5. doi: 10.3389/fimmu.2017.00005. eCollection 2017. PubMed PMID: 28154562; PubMed Central PMCID: PMC5243827.
149	NTU	2017	28134250	Qi S, Li Z, Schulze-Gahmen U, Stjepanovic G, Zhou Q, Hurley JH. Structural basis for ELL2 and AFF4 activation of HIV-1 proviral transcription. Nat Commun. 2017 Jan 30;8:14076. doi: 10.1038/ncomms14076. PubMed PMID: 28134250; PubMed Central PMCID: PMC5290273.
150	86	2018	28127697	Bhargavan B, Kanmogne GD. Differential Mechanisms of Inflammation and Endothelial Dysfunction by HIV-1 Subtype-B and Recombinant CRF02_AG Tat Proteins on Human Brain Microvascular Endothelial Cells: Implications for Viral Neuropathogenesis. Mol Neurobiol. 2018 Feb;55(2):1352-1363. doi: 10.1007/s12035-017-0382-0. Epub 2017 Jan 27. PubMed PMID: 28127697; PubMed Central PMCID: PMC6507400.
151	86	2017	28122580	Balachandran A, Wong R, Stoilov P, Pan S, Blencowe B, Cheung P, Harrigan PR, Cochrane A. Identification of small molecule modulators of HIV-1 Tat and Rev protein accumulation. Retrovirology. 2017 Jan 26;14(1):7. doi: 10.1186/s12977-017-0330-0. PubMed PMID: 28122580; PubMed Central PMCID: PMC5267425.
152	86	2017	28107387	Cho YE, Lee MH, Song BJ. Neuronal Cell Death and Degeneration through Increased Nitroxidative Stress and Tau Phosphorylation in HIV-1 Transgenic Rats. PLoS One. 2017 Jan 20;12(1):e0169945. doi: 10.1371/journal.pone.0169945. eCollection 2017. PubMed PMID: 28107387; PubMed Central PMCID: PMC5249108.
153	86	2017	28105557	Fields JA, Metcalf J, Overk C, Adame A, Spencer B, Wrasidlo W, Florio J, Rockenstein E, He JJ, Masliah E. The anticancer drug sunitinib promotes autophagyand protects from neurotoxicity in an HIV-1 Tat model of neurodegeneration. J Neurovirol. 2017 Apr;23(2):290-303. doi: 10.1007/s13365-016-0502-z. Epub 2017 Jan 19. PubMed PMID: 28105557; PubMed Central PMCID: PMC5729903.
154	86	2017	28099189	Balinang JM, Masvekar RR, Hauser KF, Knapp PE. Productive infection of human neural progenitor cells by R5 tropic HIV-1: opiate co-exposure heightens infectivity and functional vulnerability. AIDS. 2017 Mar 27;31(6):753-764. doi: 10.1097/QAD.0000000000001398. PubMed PMID: 28099189; PubMed Central PMCID: PMC5342937.
155	PEP	2017	28096156	Gomarasca M, F C Martins T, Greune L, Hardwidge PR, Schmidt MA, Rüter C. Bacterium-Derived Cell-Penetrating Peptides Deliver Gentamicin To Kill Intracellular Pathogens. Antimicrob Agents Chemother. 2017 Mar 24;61(4). pii: e02545-16. doi: 10.1128/AAC.02545-16. Print 2017 Apr. PubMed PMID: 28096156; PubMed Central PMCID: PMC5365713.
156	PEP	2017	28092646	Yamano S, Viet CT, Dang D, Dai J, Hanatani S, Takayama T, Kasai H, Imamura K, Campbell R, Ye Y, Dolan JC, Kwon WM, Schneider SD, Schmidt BL. Ex vivo nonviral gene delivery of μ-opioid receptor to attenuate cancer-induced pain. Pain. 2017 Feb;158(2):240-251. doi: 10.1097/j.pain.0000000000000750. PubMed PMID: 28092646; PubMed Central PMCID: PMC5584564.
157	86	2017	28077653	Emery A, Zhou S, Pollom E, Swanstrom R. Characterizing HIV-1 Splicing by Using Next-Generation Sequencing. J Virol. 2017 Feb 28;91(6). pii: e02515-16. doi: 10.1128/JVI.02515-16. Print 2017 Mar 15. PubMed PMID: 28077653; PubMed Central PMCID: PMC5331825.
158	86	2017	28057474	Leibrand CR, Paris JJ, Ghandour MS, Knapp PE, Kim WK, Hauser KF, McRae M. HIV-1 Tat disrupts blood-brain barrier integrity and increases phagocytic perivascular macrophages and microglia in the dorsal striatum of transgenic mice. Neurosci Lett. 2017 Feb 15;640:136-143. doi: 10.1016/j.neulet.2016.12.073. Epub 2017 Jan 3. PubMed PMID: 28057474; PubMed Central PMCID: PMC5401762.
159	PEP	2016	28002966	Abulwerdi FA, Shortridge MD, Sztuba-Solinska J, Wilson R, Le Grice SF, Varani G, Schneekloth JS Jr. Development of Small Molecules with a Noncanonical Binding Mode to HIV-1 Trans Activation Response (TAR) RNA. J Med Chem. 2016 Dec 22;59(24):11148-11160. doi: 10.1021/acs.jmedchem.6b01450. Epub 2016 Dec 2. PubMed PMID: 28002966; PubMed Central PMCID: PMC5525537.
160	PEP	2017	28000363	Schneeberger EM, Breuker K. Native Top-Down Mass Spectrometry of TAR RNA in Complexes with a Wild-Type tat Peptide for Binding Site Mapping. Angew Chem Int Ed Engl. 2017 Jan 24;56(5):1254-1258. doi: 10.1002/anie.201610836. Epub 2016 Dec 21. PubMed PMID: 28000363; PubMed Central PMCID: PMC5299493.
161	86	2016	27984726	Fernandes JD, Faust TB, Strauli NB, Smith C, Crosby DC, Nakamura RL, Hernandez RD, Frankel AD. Functional Segregation of Overlapping Genes in HIV. Cell. 2016 Dec 15;167(7):1762-1773.e12. doi: 10.1016/j.cell.2016.11.031. PubMed PMID: 27984726; PubMed Central PMCID: PMC5287106.
162	LNS	2016	27978436	Besnard E, Hakre S, Kampmann M, Lim HW, Hosmane NN, Martin A, Bassik MC, Verschueren E, Battivelli E, Chan J, Svensson JP, Gramatica A, Conrad RJ, Ott M, Greene WC, Krogan NJ, Siliciano RF, Weissman JS, Verdin E. The mTOR Complex Controls HIV Latency. Cell Host Microbe. 2016 Dec 14;20(6):785-797. doi: 10.1016/j.chom.2016.11.001. PubMed PMID: 27978436; PubMed Central PMCID: PMC5354304.
163	NTU	2016	27978431	Giacca M. HIV Latency TORn Down. Cell Host Microbe. 2016 Dec 14;20(6):700-702. doi: 10.1016/j.chom.2016.11.009. PubMed PMID: 27978431.
164	86	2016	27966610	Quizon PM, Sun WL, Yuan Y, Midde NM, Zhan CG, Zhu J. Molecular mechanism: the human dopamine transporter histidine 547 regulates basal and HIV-1 Tat protein-inhibited dopamine transport. Sci Rep. 2016 Dec 14;6:39048. doi: 10.1038/srep39048. PubMed PMID: 27966610; PubMed Central PMCID: PMC5155291.
165	LNS	2017	27928057	Shkreta L, Blanchette M, Toutant J, Wilhelm E, Bell B, Story BA, Balachandran A, Cochrane A, Cheung PK, Harrigan PR, Grierson DS, Chabot B. Modulation of the splicing regulatory function of SRSF10 by a novel compound that impairs HIV-1 replication. Nucleic Acids Res. 2017 Apr 20;45(7):4051-4067. doi: 10.1093/nar/gkw1223. PubMed PMID: 27928057; PubMed Central PMCID: PMC5397194.
166	72	2016	27917627	Hosseini Rouzbahani N, Bayanolhagh S, Gholami M, Esmaeilzadeh A, Bayat Jozani Z, Mohraz M, Pourfathollah AA. Enhanced Immune Responses against HIV-1 with Adenovector (Gag and Tat) Prime/Protein Boost Regimen and GM-CSF Injection. Iran J Allergy Asthma Immunol. 2016 Oct;15(5):403-412. PubMed PMID: 27917627.
167	86, 101	2016	27889708	Zhan J, Qin S, Lu L, Hu X, Zhou J, Sun Y, Yang J, Liu Y, Wang Z, Tan N, Chen J, Zhang C. miR-34a is a common link in both HIV- and antiretroviral therapy-induced vascular aging. Aging (Albany NY). 2016 Nov 26;8(12):3298-3310. doi: 10.18632/aging.101118. PubMed PMID: 27889708; PubMed Central PMCID: PMC5270669.
168	86	2016	27877102	Xu C, Fitting S. Inhibition of GABAergic Neurotransmission by HIV-1 Tat and Opioid Treatment in the Striatum Involves μ-Opioid Receptors. Front Neurosci. 2016 Nov 8;10:497. eCollection 2016. PubMed PMID: 27877102; PubMed Central PMCID: PMC5099255.
169	PEP	2016	27867372	Saha D, Podder S, Ghosh TC. Overlapping Regions in HIV-1 Genome Act as Potential Sites for Host-Virus Interaction. Front Microbiol. 2016 Nov 4;7:1735. eCollection 2016. PubMed PMID: 27867372; PubMed Central PMCID: PMC5095123.
170	PEP, 86	2016	27853256	Tomusange K, Wijesundara D, Gummow J, Wesselingh S, Suhrbier A, Gowans EJ, Grubor-Bauk B. Mucosal vaccination with a live recombinant rhinovirus followed by intradermal DNA administration elicits potent and protective HIV-specific immune responses. Sci Rep. 2016 Nov 17;6:36658. doi: 10.1038/srep36658. PubMed PMID: 27853256; PubMed Central PMCID: PMC5113119.
171	PEP	2016	27852926	Bourbigot S, Dock-Bregeon AC, Eberling P, Coutant J, Kieffer B, Lebars I. Solution structure of the 5'-terminal hairpin of the 7SK small nuclear RNA. RNA. 2016 Dec;22(12):1844-1858. Epub 2016 Oct 20. PubMed PMID: 27852926; PubMed Central PMCID: PMC5113205.
172	86	2016	27822141	Rossi FW, Prevete N, Rivellese F, Lobasso A, Napolitano F, Granata F, Selleri C, de Paulis A. HIV-1 Nef promotes migration and chemokine synthesis of human basophils and mast cells through the interaction with CXCR4. Clin Mol Allergy. 2016 Nov 1;14:15. eCollection 2016. PubMed PMID: 27822141; PubMed Central PMCID: PMC5088669.
173	LNS	2017	27816768	Liu H, Liu J, Xu E, Tu G, Guo M, Liang S, Xiong H. Human immunodeficiency virus protein Tat induces oligodendrocyte injury by enhancing outward K(+) current conducted by K(V)1.3. Neurobiol Dis. 2017 Jan;97(Pt A):1-10. doi: 10.1016/j.nbd.2016.10.007. Epub 2016 Nov 2. PubMed PMID: 27816768; PubMed Central PMCID: PMC5138138.
174	86	2016	27807176	Fan Y, Gao X, Chen J, Liu Y, He JJ. HIV Tat Impairs Neurogenesis through Functioning As a Notch Ligand and Activation of Notch Signaling Pathway. J Neurosci. 2016 Nov 2;36(44):11362-11373. PubMed PMID: 27807176; PubMed Central PMCID: PMC5148248.
175	LNS	2016	27795392	Remoli AL, Marsili G, Perrotti E, Acchioni C, Sgarbanti M, Borsetti A, Hiscott J, Battistini A. HIV-1 Tat Recruits HDM2 E3 Ligase To Target IRF-1 for Ubiquitination and Proteasomal Degradation. MBio. 2016 Oct 18;7(5). pii: e01528-16. doi: 10.1128/mBio.01528-16. PubMed PMID: 27795392; PubMed Central PMCID: PMC5082900.
176	PEP	2017	27769520	Ishiguro S, Alhakamy NA, Uppalapati D, Delzeit J, Berkland CJ, Tamura M. Combined Local Pulmonary and Systemic Delivery of AT2R Gene by Modified TAT Peptide Nanoparticles Attenuates Both Murine and Human Lung Carcinoma Xenografts in Mice. J Pharm Sci. 2017 Jan;106(1):385-394. doi: 10.1016/j.xphs.2016.08.023. Epub 2016 Oct 18. PubMed PMID: 27769520; PubMed Central PMCID: PMC5161536.
177	PEP	2016	27731797	Schulze-Gahmen U, Echeverria I, Stjepanovic G, Bai Y, Lu H, Schneidman-Duhovny D, Doudna JA, Zhou Q, Sali A, Hurley JH. Insights into HIV-1 proviral transcription from integrative structure and dynamics of the Tat:AFF4:P-TEFb:TAR complex. Elife. 2016 Oct 12;5. pii: e15910. doi: 10.7554/eLife.15910. PubMed PMID: 27731797; PubMed Central PMCID: PMC5072841.
178	PEP	2016	27741225	Sun Y, Ye Q, Wu M, Wu Y, Zhang C, Yan W. High yields and soluble expression of superoxide dismutases in Escherichia coli due to the HIV-1 Tat peptide via increases in mRNA transcription. Exp Mol Med. 2016 Oct 14;48(10):e264. doi: 10.1038/emm.2016.91. PubMed PMID: 27741225; PubMed Central PMCID: PMC5099423.
179	LNS	2016	27739323	Yuan Y, Huang X, Zhu J, Zhan CG. Computational modeling of human dopamine transporter structures, mechanism and its interaction with HIV-1 transactivator of transcription. Future Med Chem. 2016 Nov;8(17):2077-2089. doi: 10.4155/fmc-2016-0138. Epub 2016 Oct 14. PubMed PMID: 27739323; PubMed Central PMCID: PMC6113701.
180	72, 101	2016	27725726	Le Douce V, Forouzanfar F, Eilebrecht S, Van Driessche B, Ait-Ammar A, Verdikt R, Kurashige Y, Marban C, Gautier V, Candolfi E, Benecke AG, Van Lint C, Rohr O, Schwartz C. HIC1 controls cellular- and HIV-1- gene transcription via interactions with CTIP2 and HMGA1. Sci Rep. 2016 Oct 11;6:34920. doi: 10.1038/srep34920. Erratum in: Sci Rep. 2017 Feb 10;7:39569. PubMed PMID: 27725726; PubMed Central …
181	86	2016	27698804	Barillari G, Palladino C, Bacigalupo I, Leone P, Falchi M, Ensoli B. Entrance of the Tat protein of HIV-1 into human uterine cervical carcinoma cells causes upregulation of HPV-E6 expression and a decrease in p53 protein levels. Oncol Lett. 2016 Oct;12(4):2389-2394. Epub 2016 Jul 29. PubMed PMID: 27698804; PubMed Central PMCID: PMC5038842.
182	86, 101	2016	27681137	Lacombe B, Morel M, Margottin-Goguet F, Ramirez BC. Specific Inhibition of HIV Infection by the Action of Spironolactone in T Cells. J Virol. 2016 Nov 14;90(23):10972-10980. doi: 10.1128/JVI.01722-16. Print 2016 Dec 1. PubMed PMID: 27681137; PubMed Central PMCID: PMC5110165.
183	PEP	2016	27661121	Zhao J, Zhao F, Wang X, Fan X, Wu G. Secondary nuclear targeting of mesoporous silica nano-particles for cancer-specific drug delivery based on charge inversion. Oncotarget. 2016 Oct 25;7(43):70100-70112. doi: 10.18632/oncotarget.12149. PubMed PMID: 27661121; PubMed Central PMCID: PMC5342538.
184	86	2016	27659560	Wheeler NA, Fuss B, Knapp PE, Zou S. HIV-1 Tat Inhibits Autotaxin Lysophospholipase D Activity and Modulates Oligodendrocyte Differentiation. ASN Neuro. 2016 Sep 22;8(5). pii: 1759091416669618. Print 2016 Oct. PubMed PMID: 27659560; PubMed Central PMCID: PMC5036141.
185	86	2016	27634380	Rahimian P, He JJ. HIV-1 Tat-shortened neurite outgrowth through regulation of microRNA-132 and its target gene expression. J Neuroinflammation. 2016 Sep 15;13(1):247. doi: 10.1186/s12974-016-0716-2. PubMed PMID: 27634380; PubMed Central PMCID: PMC5025601.
186	PEP, 72	2017	27629410	Soliman ML, Geiger JD, Chen X. Caffeine Blocks HIV-1 Tat-Induced Amyloid Beta Production and Tau Phosphorylation. J Neuroimmune Pharmacol. 2017 Mar;12(1):163-170. doi: 10.1007/s11481-016-9707-4. Epub 2016 Sep 15. PubMed PMID: 27629410; PubMed Central PMCID: PMC5316495.
187	86	2016	27609520	Fan Y, He JJ. HIV-1 Tat Induces Unfolded Protein Response and Endoplasmic Reticulum Stress in Astrocytes and Causes Neurotoxicity through Glial Fibrillary Acidic Protein (GFAP) Activation and Aggregation. J Biol Chem. 2016 Oct 21;291(43):22819-22829. Epub 2016 Sep 8. PubMed PMID: 27609520; PubMed Central PMCID: PMC5077214.
188	86	2016	27609518	Fan Y, He JJ. HIV-1 Tat Promotes Lysosomal Exocytosis in Astrocytes and Contributes to Astrocyte-mediated Tat Neurotoxicity. J Biol Chem. 2016 Oct 21;291(43):22830-22840. Epub 2016 Sep 8. PubMed PMID: 27609518; PubMed Central PMCID: PMC5077215.
189	86	2016	27596538	Sugden S, Ghazawi F, MacPherson P. HIV-1 tat protein recruits CIS to the cytoplasmic tail of CD127 to induce receptor ubiquitination and proteasomal degradation. Virology. 2016 Nov;498:192-200. doi: 10.1016/j.virol.2016.08.024. Epub 2016 Sep 4. PubMed PMID: 27596538.
190	86	2016	27563375	Chen Y, Huang W, Jiang W, Wu X, Ye B, Zhou X. HIV-1 Tat Regulates Occludin and Aβ Transfer Receptor Expression in Brain Endothelial Cells via Rho/ROCK Signaling Pathway. Oxid Med Cell Longev. 2016;2016:4196572. doi: 10.1155/2016/4196572. Epub 2016 Aug 2. PubMed PMID: 27563375; PubMed Central PMCID: PMC4985576.
191	LNS	2016	27558685	Zhao Y, Karijolich J, Glaunsinger B, Zhou Q. Pseudouridylation of 7SK snRNA promotes 7SK snRNP formation to suppress HIV-1 transcription and escape from latency. EMBO Rep. 2016 Oct;17(10):1441-1451. Epub 2016 Aug 24. PubMed PMID: 27558685; PubMed Central PMCID: PMC5048380.
192	86	2016	27549342	Cafaro A, Piccaro G, Altavilla G, Gigantino V, Matarese G, Olivieri E, Ferrantelli F, Ensoli B, Palma C. HIV-1 Tat protein vaccination in mice infected with Mycobacterium tuberculosis is safe, immunogenic and reduces bacterial lung pathology. BMC Infect Dis. 2016 Aug 22;16(1):442. doi: 10.1186/s12879-016-1724-7. PubMed PMID: 27549342; PubMed Central PMCID: PMC4994248.
193	86	2016	27528385	Kaminski R, Chen Y, Salkind J, Bella R, Young WB, Ferrante P, Karn J, Malcolm T, Hu W, Khalili K. Negative Feedback Regulation of HIV-1 by Gene Editing Strategy. Sci Rep. 2016 Aug 16;6:31527. doi: 10.1038/srep31527. PubMed PMID: 27528385; PubMed Central PMCID: PMC4985742.
194	86	2016	27491828	Guedia J, Brun P, Bhave S, Fitting S, Kang M, Dewey WL, Hauser KF, Akbarali HI. HIV-1 Tat exacerbates lipopolysaccharide-induced cytokine release via TLR4 signaling in the enteric nervous system. Sci Rep. 2016 Aug 5;6:31203. doi: 10.1038/srep31203. PubMed PMID: 27491828; PubMed Central PMCID: PMC4974559.
195	NTU	2016	27473196	Buch S, Chivero ET, Hoare J, Jumare J, Nakasujja N, Mudenda V, Paul R, Kanmogne GD, Sacktor N, Wood C, Royal W, Joseph J. Proceedings from the NIMH symposium on ""NeuroAIDS in Africa: neurological and neuropsychiatric complications of HIV"". J Neurovirol. 2016 Oct;22(5):699-702. Epub 2016 Jul 29. PubMed PMID: 27473196; PubMed Central PMCID: PMC5055435.
196	LNS	2016	27461529	Tantale K, Mueller F, Kozulic-Pirher A, Lesne A, Victor JM, Robert MC, Capozi S, Chouaib R, Bäcker V, Mateos-Langerak J, Darzacq X, Zimmer C, Basyuk E, Bertrand E. A single-molecule view of transcription reveals convoys of RNA polymerases and multi-scale bursting. Nat Commun. 2016 Jul 27;7:12248. doi: 10.1038/ncomms12248. PubMed PMID: 27461529; PubMed Central PMCID: PMC4974459.
197	86, 101	2016	27450538	Nicoli F, Chachage M, Clowes P, Bauer A, Kowour D, Ensoli B, Cafaro A, Maboko L, Hoelscher M, Gavioli R, Saathoff E, Geldmacher C. Association between different anti-Tat antibody isotypes and HIV disease progression: data from an African cohort. BMC Infect Dis. 2016 Jul 22;16:344. doi: 10.1186/s12879-016-1647-3. PubMed PMID: 27450538; PubMed Central PMCID: PMC4957276.
198	NTU	2016	27440900	Yan Q, Shen C, Qin J, Li W, Hu M, Lu H, Qin D, Zhu J, Gao SJ, Lu C. HIV-1 Vpr Inhibits Kaposi's Sarcoma-Associated Herpesvirus Lytic Replication by Inducing MicroRNA miR-942-5p and Activating NF-κB Signaling. J Virol. 2016 Sep 12;90(19):8739-53. doi: 10.1128/JVI.00797-16. Print 2016 Oct 1. PubMed PMID: 27440900; PubMed Central PMCID: PMC5021437.
199	72	2016	27438849	Teto G, Fonsah JY, Tagny CT, Mbanya D, Nchindap E, Kenmogne L, Fokam J, Njamnshi DM, Kouanfack C, Njamnshi AK, Kanmogne GD. Molecular and Genetic Characterization of HIV-1 Tat Exon-1 Gene from Cameroon Shows Conserved Tat HLA-Binding Epitopes: Functional Implications. Viruses. 2016 Jul 18;8(7). pii: E196. doi: 10.3390/v8070196. PubMed PMID: 27438849; PubMed Central PMCID: PMC4974531.
200	PEP	2016	27434684	Abushahba MF, Mohammad H, Seleem MN. Targeting Multidrug-resistant Staphylococci with an anti-rpoA Peptide Nucleic Acid Conjugated to the HIV-1 TAT Cell Penetrating Peptide. Mol Ther Nucleic Acids. 2016 Jul 19;5(7):e339. doi: 10.1038/mtna.2016.53. PubMed PMID: 27434684; PubMed Central PMCID: PMC5330942.
201	86	2016	27434587	Geng G, Liu B, Chen C, Wu K, Liu J, Zhang Y, Pan T, Li J, Yin Y, Zhang J, Huang F, Yu F, Chen J, Ma X, Zhou J, Kuang E, Liu C, Cai W, Zhang H. Development of an Attenuated Tat Protein as a Highly-effective Agent to Specifically Activate HIV-1 Latency. Mol Ther. 2016 Sep;24(9):1528-37. doi: 10.1038/mt.2016.117. Epub 2016 Jun 6. PubMed PMID: 27434587; PubMed Central PMCID: PMC5113098.
202	NTU	2016	27427877	Yek C, Gianella S, Plana M, Castro P, Scheffler K, García F, Massanella M, Smith DM. Standard vaccines increase HIV-1 transcription during antiretroviral therapy. AIDS. 2016 Sep 24;30(15):2289-98. doi: 10.1097/QAD.0000000000001201. PubMed PMID: 27427877; PubMed Central PMCID: PMC5559226.
203	PEP	2016	27405089	Malina J, Hannon MJ, Brabec V. Iron(II) supramolecular helicates interfere with the HIV-1 Tat-TAR RNA interaction critical for viral replication. Sci Rep. 2016 Jul 12;6:29674. doi: 10.1038/srep29674. PubMed PMID: 27405089; PubMed Central PMCID: PMC4940744.
204	NTU	2016	27400932	de Almeida SM, Rotta I, Jiang Y, Li X, Raboni SM, Ribeiro CE, Smith D, Potter M, Vaida F, Letendre S, Ellis RJ; HNRC Group. Biomarkers of chemotaxis and inflammation in cerebrospinal fluid and serum in individuals with HIV-1 subtype C versus B. J Neurovirol. 2016 Dec;22(6):715-724. Epub 2016 Jul 11. PubMed PMID: 27400932; PubMed Central PMCID: PMC5130607.
205	86	2016	27381288	Jin H, Li D, Sivakumaran H, Lor M, Rustanti L, Cloonan N, Wani S, Harrich D. Shutdown of HIV-1 Transcription in T Cells by Nullbasic, a Mutant Tat Protein. MBio. 2016 Jul 5;7(4). pii: e00518-16. doi: 10.1128/mBio.00518-16. PubMed PMID: 27381288; PubMed Central PMCID: PMC4958243.
206	PEP, 101	2016	27358023	Tomusange K, Wijesundara D, Gummow J, Garrod T, Li Y, Gray L, Churchill M, Grubor-Bauk B, Gowans EJ. A HIV-Tat/C4-binding protein chimera encoded by a DNA vaccine is highly immunogenic and contains acute EcoHIV infection in mice. Sci Rep. 2016 Jun 30;6:29131. doi: 10.1038/srep29131. PubMed PMID: 27358023; PubMed Central PMCID: PMC4928126.
207	86	2016	27316905	Kesby JP, Markou A, Semenova S. The effects of HIV-1 regulatory TAT protein expression on brain reward function, response to psychostimulants and delay-dependent memory in mice. Neuropharmacology. 2016 Oct;109:205-215. doi: 10.1016/j.neuropharm.2016.06.011. Epub 2016 Jun 15. PubMed PMID: 27316905; PubMed Central PMCID: PMC4970920.
208	86	2016	27291871	Li J, Chen C, Ma X, Geng G, Liu B, Zhang Y, Zhang S, Zhong F, Liu C, Yin Y, Cai W, Zhang H. Long noncoding RNA NRON contributes to HIV-1 latency by specifically inducing tat protein degradation. Nat Commun. 2016 Jun 13;7:11730. doi: 10.1038/ncomms11730. PubMed PMID: 27291871; PubMed Central PMCID: PMC4909936.
209	PEP	2016	27286828	Borkar AN, Bardaro MF Jr, Camilloni C, Aprile FA, Varani G, Vendruscolo M. Structure of a low-population binding intermediate in protein-RNA recognition. Proc Natl Acad Sci U S A. 2016 Jun 28;113(26):7171-6. doi: 10.1073/pnas.1521349113. Epub 2016 Jun 10. PubMed PMID: 27286828; PubMed Central PMCID: PMC4932932.
210	86	2016	27283735	Ali A, Banerjea AC. Curcumin inhibits HIV-1 by promoting Tat protein degradation. Sci Rep. 2016 Jun 10;6:27539. doi: 10.1038/srep27539. PubMed PMID: 27283735; PubMed Central PMCID: PMC4901322.
211	86	2016	27277839	Ensoli B, Nchabeleng M, Ensoli F, Tripiciano A, Bellino S, Picconi O, Sgadari C, Longo O, Tavoschi L, Joffe D, Cafaro A, Francavilla V, Moretti S, Pavone Cossut MR, Collacchi B, Arancio A, Paniccia G, Casabianca A, Magnani M, Buttò S, Levendal E, Ndimande JV, Asia B, Pillay Y, Garaci E, Monini P; SMU-MeCRU study group. HIV-Tat immunization induces cross-clade neutralizing antibodies and CD4(+) T …
212	LNS	2016	27253715	Crawford DW, Blakeley BD, Chen PH, Sherpa C, Le Grice SF, Laird-Offringa IA, McNaughton BR. An Evolved RNA Recognition Motif That Suppresses HIV-1 Tat/TAR-Dependent Transcription. ACS Chem Biol. 2016 Aug 19;11(8):2206-15. doi: 10.1021/acschembio.6b00145. Epub 2016 Jun 13. PubMed PMID: 27253715; PubMed Central PMCID: PMC5199234.
213	86	2016	27250920	Yuan Y, Quizon PM, Sun WL, Yao J, Zhu J, Zhan CG. Role of Histidine 547 of Human Dopamine Transporter in Molecular Interaction with HIV-1 Tat and Dopamine Uptake. Sci Rep. 2016 Jun 2;6:27314. doi: 10.1038/srep27314. PubMed PMID: 27250920; PubMed Central PMCID: PMC4890318.
214	72, 101	2016	27235396	Ali I, Ramage H, Boehm D, Dirk LM, Sakane N, Hanada K, Pagans S, Kaehlcke K, Aull K, Weinberger L, Trievel R, Schnoelzer M, Kamada M, Houtz R, Ott M. The HIV-1 Tat Protein Is Monomethylated at Lysine 71 by the Lysine Methyltransferase KMT7. J Biol Chem. 2016 Jul 29;291(31):16240-8. doi: 10.1074/jbc.M116.735415. Epub 2016 May 27. PubMed PMID: 27235396; PubMed Central PMCID: PMC4965572.
215	LNS	2016	27200480	Lin YZ, Sun LK, Zhu DT, Hu Z, Wang XF, Du C, Wang YH, Wang XJ, Zhou JH. Equine schlafen 11 restricts the production of equine infectious anemia virus via a codon usage-dependent mechanism. Virology. 2016 Aug;495:112-21. doi: 10.1016/j.virol.2016.04.024. Epub 2016 May 18. PubMed PMID: 27200480.
216	NTU	2016	27195985	Dampier W, Nonnemacher MR, Mell J, Earl J, Ehrlich GD, Pirrone V, Aiamkitsumrit B, Zhong W, Kercher K, Passic S, Williams JW, Jacobson JM, Wigdahl B. HIV-1 Genetic Variation Resulting in the Development of New Quasispecies Continues to Be Encountered in the Peripheral Blood of Well-Suppressed Patients. PLoS One. 2016 May 19;11(5):e0155382. doi: 10.1371/journal.pone.0155382. eCollection 2016. PubM…
217	NAP	2016	27189226	Chen L, Chen Y, Zhang D, Hou M, Yang B, Zhang F, Zhang W, Luo X, Ji M, Wu G. Protection and immunological study on two tetraspanin-derived vaccine candidates against schistosomiasis japonicum. Parasite Immunol. 2016 Oct;38(10):589-98. doi: 10.1111/pim.12338. Epub 2016 Jun 13. PubMed PMID: 27189226.
218	86	2016	27178324	Marks WD, Paris JJ, Schier CJ, Denton MD, Fitting S, McQuiston AR, Knapp PE, Hauser KF. HIV-1 Tat causes cognitive deficits and selective loss of parvalbumin, somatostatin, and neuronal nitric oxide synthase expressing hippocampal CA1 interneuron subpopulations. J Neurovirol. 2016 Dec;22(6):747-762. Epub 2016 May 13. PubMed PMID: 27178324; PubMed Central PMCID: PMC5107352.
219	86	2016	27173397	Rahimian P, He JJ. Exosome-associated release, uptake, and neurotoxicity of HIV-1 Tat protein. J Neurovirol. 2016 Dec;22(6):774-788. Epub 2016 May 12. PubMed PMID: 27173397; PubMed Central PMCID: PMC5690550.
220	NTU	2016	27143130	Antell GC, Dampier W, Aiamkitsumrit B, Nonnemacher MR, Jacobson JM, Pirrone V, Zhong W, Kercher K, Passic S, Williams JW, Schwartz G, Hershberg U, Krebs FC, Wigdahl B. Utilization of HIV-1 envelope V3 to identify X4- and R5-specific Tat and LTR sequence signatures. Retrovirology. 2016 May 3;13(1):32. doi: 10.1186/s12977-016-0266-9. PubMed PMID: 27143130; PubMed Central PMCID: PMC4855882.
221	NTU	2016	27099783	Shadrina OA, Knyazhanskaya ES, Korolev SP, Gottikh MB. Host Proteins Ku and HMGA1 As Participants of HIV-1 Transcription. Acta Naturae. 2016 Jan-Mar;8(1):34-47. PubMed PMID: 27099783; PubMed Central PMCID: PMC4837570.
222	NTU	2016	27098021	Gray GE, Mayer KH, Elizaga ML, Bekker LG, Allen M, Morris L, Montefiori D, De Rosa SC, Sato A, Gu N, Tomaras GD, Tucker T, Barnett SW, Mkhize NN, Shen X, Downing K, Williamson C, Pensiero M, Corey L, Williamson AL. Subtype C gp140 Vaccine Boosts Immune Responses Primed by the South African AIDS Vaccine Initiative DNA-C2 and MVA-C HIV Vaccines after More than a 2-Year Gap. Clin Vaccine Immunol. 20…
223	86	2016	27097314	Das JR, Gutkind JS, Ray PE. Circulating Fibroblast Growth Factor-2, HIV-Tat, and Vascular Endothelial Cell Growth Factor-A in HIV-Infected Children with Renal Disease Activate Rho-A and Src in Cultured Renal Endothelial Cells. PLoS One. 2016 Apr 20;11(4):e0153837. doi: 10.1371/journal.pone.0153837. eCollection 2016. PubMed PMID: 27097314; PubMed Central PMCID: PMC4838216.
224	NTU	2016	27093170	Spanevello F, Calistri A, Del Vecchio C, Mantelli B, Frasson C, Basso G, Palù G, Cavazzana M, Parolin C. Development of Lentiviral Vectors Simultaneously Expressing Multiple siRNAs Against CCR5, vif and tat/rev Genes for an HIV-1 Gene Therapy Approach. Mol Ther Nucleic Acids. 2016 Apr 19;5:e312. doi: 10.1038/mtna.2016.24. PubMed PMID: 27093170; PubMed Central PMCID: PMC5014525.
225	86	2016	27089879	Forlani G, Turrini F, Ghezzi S, Tedeschi A, Poli G, Accolla RS, Tosi G. The MHC-II transactivator CIITA inhibits Tat function and HIV-1 replication in human myeloid cells. J Transl Med. 2016 Apr 18;14:94. doi: 10.1186/s12967-016-0853-5. PubMed PMID: 27089879; PubMed Central PMCID: PMC4835826.
226	LNS	2016	27060080	Sardo L, Vakil PR, Elbezanti W, El-Sayed A, Klase Z. The inhibition of microRNAs by HIV-1 Tat suppresses beta catenin activity in astrocytes. Retrovirology. 2016 Apr 8;13:25. doi: 10.1186/s12977-016-0256-y. PubMed PMID: 27060080; PubMed Central PMCID: PMC4826512.
227	86, 101	2016	27053552	Planès R, Ben Haij N, Leghmari K, Serrero M, BenMohamed L, Bahraoui E. HIV-1 Tat Protein Activates both the MyD88 and TRIF Pathways To Induce Tumor Necrosis Factor Alpha and Interleukin-10 in Human Monocytes. J Virol. 2016 Jun 10;90(13):5886-5898. doi: 10.1128/JVI.00262-16. Print 2016 Jul 1. PubMed PMID: 27053552; PubMed Central PMCID: PMC4907244.
228	101	2016	27036656	Loret EP, Darque A, Jouve E, Loret EA, Nicolino-Brunet C, Morange S, Castanier E, Casanova J, Caloustian C, Bornet C, Coussirou J, Boussetta J, Couallier V, Blin O, Dussol B, Ravaux I. Intradermal injection of a Tat Oyi-based therapeutic HIV vaccine reduces of 1.5 log copies/mL the HIV RNA rebound median and no HIV DNA rebound following cART interruption in a phase I/II randomized controlled clin…
229	86	2016	27032771	De Simone FI, Darbinian N, Amini S, Muniswamy M, White MK, Elrod JW, Datta PK, Langford D, Khalili K. HIV-1 Tat and Cocaine Impair Survival of Cultured Primary Neuronal Cells via a Mitochondrial Pathway. J Neuroimmune Pharmacol. 2016 Jun;11(2):358-68. doi: 10.1007/s11481-016-9669-6. Epub 2016 Mar 31. PubMed PMID: 27032771; PubMed Central PMCID: PMC5215880.
230	NTU	2016	27014190	Atluri VS. Editorial: HIV and Illicit Drugs of Abuse. Front Microbiol. 2016 Mar 10;7:221. doi: 10.3389/fmicb.2016.00221. eCollection 2016. PubMed PMID: 27014190; PubMed Central PMCID: PMC4785150.
231	86	2016	26993829	Xu C, Hermes DJ, Mackie K, Lichtman AH, Ignatowska-Jankowska BM, Fitting S. Cannabinoids Occlude the HIV-1 Tat-Induced Decrease in GABAergic Neurotransmission in Prefrontal Cortex Slices. J Neuroimmune Pharmacol. 2016 Jun;11(2):316-31. doi: 10.1007/s11481-016-9664-y. Epub 2016 Mar 18. PubMed PMID: 26993829; PubMed Central PMCID: PMC4848126.
232	NTU	2016	28959563	Collí-Dulá RC, Friedman MA, Hansen B, Denslow ND. Transcriptomics analysis and hormonal changes of male and female neonatal rats treated chronically with a low dose of acrylamide in their drinking water. Toxicol Rep. 2016 Mar 19;3:414-426. doi: 10.1016/j.toxrep.2016.03.009. eCollection 2016. PubMed PMID: 28959563; PubMed Central PMCID: PMC5615912.
233	LNS	2016	26984732	Hashemi FB, Barreto K, Bernhard W, Hashemi P, Lomness A, Sadowski I. HIV Provirus Stably Reproduces Parental Latent and Induced Transcription Phenotypes Regardless of the Chromosomal Integration Site. J Virol. 2016 May 12;90(11):5302-14. doi: 10.1128/JVI.02842-15. Print 2016 Jun 1. PubMed PMID: 26984732; PubMed Central PMCID: PMC4934743.
234	86	2016	26984525	Harwig A, Jongejan A, van Kampen AH, Berkhout B, Das AT. Tat-dependent production of an HIV-1 TAR-encoded miRNA-like small RNA. Nucleic Acids Res. 2016 May 19;44(9):4340-53. doi: 10.1093/nar/gkw167. Epub 2016 Mar 16. PubMed PMID: 26984525; PubMed Central PMCID: PMC4872094.
235	72, 101	2016	26973648	López-Huertas MR, Li J, Zafar A, Rodríguez-Mora S, García-Domínguez C, Mateos E, Alcamí J, Rao S, Coiras M. PKCθ and HIV-1 Transcriptional Regulator Tat Co-exist at the LTR Promoter in CD4(+) T Cells. Front Immunol. 2016 Feb 29;7:69. doi: 10.3389/fimmu.2016.00069. eCollection 2016. PubMed PMID: 26973648; PubMed Central PMCID: PMC4770193.
236	NTU	2016	26959508	Wang L, Zhao J, Ren JP, Wu XY, Morrison ZD, Elgazzar MA, Ning SB, Moorman JP, Yao ZQ. Expansion of myeloid-derived suppressor cells promotes differentiation of regulatory T cells in HIV-1+ individuals. AIDS. 2016 Jun 19;30(10):1521-1531. doi: 10.1097/QAD.0000000000001083. PubMed PMID: 26959508; PubMed Central PMCID: PMC4889474.
237	86	2016	26912631	Nomaguchi M, Doi N, Sakai Y, Ode H, Iwatani Y, Ueno T, Matsumoto Y, Miyazaki Y, Masuda T, Adachi A. Natural Single-Nucleotide Variations in the HIV-1 Genomic SA1prox Region Can Alter Viral Replication Ability by Regulating Vif Expression Levels. J Virol. 2016 Apr 14;90(9):4563-4578. doi: 10.1128/JVI.02939-15. Print 2016 May. PubMed PMID: 26912631; PubMed Central PMCID: PMC4836328.
238	LNS	2016	26891316	Li Y, Belshan M. NF45 and NF90 Bind HIV-1 RNA and Modulate HIV Gene Expression. Viruses. 2016 Feb 16;8(2). pii: E47. doi: 10.3390/v8020047. PubMed PMID: 26891316; PubMed Central PMCID: PMC4776202.
239	86	2016	26863270	Nishimura C, Polesskaya O, Dewhurst S, Silva JN. Quantification of Cerebral Vascular Architecture using Two-photon Microscopy in a Mouse Model of HIV-induced Neuroinflammation. J Vis Exp. 2016 Jan 12;(107):e53582. doi: 10.3791/53582. PubMed PMID: 26863270; PubMed Central PMCID: PMC4781447.
240	NTU	2015	26862581	Bhargavan B, Woollard SM, Kanmogne GD. Data in support of NFκB and JNK pathways involvement in TLR3-mediated HIV-1 transactivation, expression of IL-6 and transcription factors associated with HIV-1 replication. Data Brief. 2015 Dec 17;6:345-51. doi: 10.1016/j.dib.2015.12.022. eCollection 2016 Mar. PubMed PMID: 26862581; PubMed Central PMCID: PMC4706625.
241	86	2016	26845176	Hahn YK, Paris JJ, Lichtman AH, Hauser KF, Sim-Selley LJ, Selley DE, Knapp PE. Central HIV-1 Tat exposure elevates anxiety and fear conditioned responses of male mice concurrent with altered mu-opioid receptor-mediated G-protein activation and β-arrestin 2 activity in the forebrain. Neurobiol Dis. 2016 Aug;92(Pt B):124-36. doi: 10.1016/j.nbd.2016.01.014. Epub 2016 Feb 1. PubMed PMID: 26845176; Pu…
242	LNS	2016	26843384	Villeneuve LM, Purnell PR, Stauch KL, Callen SE, Buch SJ, Fox HS. HIV-1 transgenic rats display mitochondrial abnormalities consistent with abnormal energy generation and distribution. J Neurovirol. 2016 Oct;22(5):564-574. Epub 2016 Feb 3. PubMed PMID: 26843384; PubMed Central PMCID: PMC4972699.
243	NTU	2015	26839837	Smith KA, Lin X, Bolshakov O, Griffin J, Niu X, Kovalskyy D, Ivanov A, Jerebtsova M, Taylor RE, Akala E, Nekhai S. Activation of HIV-1 with Nanoparticle-Packaged Small-Molecule Protein Phosphatase-1-Targeting Compound. Sci Pharm. 2015 Jun 22;83(3):535-48. doi: 10.3797/scipharm.1502-01. Print 2015 Jul-Sep. PubMed PMID: 26839837; PubMed Central PMCID: PMC4727795.
244	86	2016	26830226	Li Z, Lu H, Zhou Q. A Minor Subset of Super Elongation Complexes Plays a Predominant Role in Reversing HIV-1 Latency. Mol Cell Biol. 2016 Feb 1;36(7):1194-205. doi: 10.1128/MCB.00994-15. PubMed PMID: 26830226; PubMed Central PMCID: PMC4800791.
245	86	2016	26774528	Paris JJ, Zou S, Hahn YK, Knapp PE, Hauser KF. 5α-reduced progestogens ameliorate mood-related behavioral pathology, neurotoxicity, and microgliosis associated with exposure to HIV-1 Tat. Brain Behav Immun. 2016 Jul;55:202-214. doi: 10.1016/j.bbi.2016.01.007. Epub 2016 Jan 13. PubMed PMID: 26774528; PubMed Central PMCID: PMC4899138.
246	NTU	2016	26761518	Jacobson JM, Zheng L, Wilson CC, Tebas P, Matining RM, Egan MA, Eldridge J, Landay AL, Clifford DB, Luetkemeyer AF, Tiu J, Martinez AL, Janik J, Spitz TA, Hural J, McElrath J, Frahm N; ACTG A5281 Protocol Team. The Safety and Immunogenicity of an Interleukin-12-Enhanced Multiantigen DNA Vaccine Delivered by Electroporation for the Treatment of HIV-1 Infection. J Acquir Immune Defic Syndr. 2016 Fe…
247	101	2016	26714725	Rao VR, Eugenin EA, Prasad VR. Evaluating the Role of Viral Proteins in HIV-Mediated Neurotoxicity Using Primary Human Neuronal Cultures. Methods Mol Biol. 2016;1354:367-76. doi: 10.1007/978-1-4939-3046-3_25. PubMed PMID: 26714725; PubMed Central PMCID: PMC5050920.
248	NTU	2015	26683615	Turrini F, Marelli S, Kajaste-Rudnitski A, Lusic M, Van Lint C, Das AT, Harwig A, Berkhout B, Vicenzi E. HIV-1 transcriptional silencing caused by TRIM22 inhibition of Sp1 binding to the viral promoter. Retrovirology. 2015 Dec 18;12:104. doi: 10.1186/s12977-015-0230-0. PubMed PMID: 26683615; PubMed Central PMCID: PMC4683785.
249	NTU	2015	26678821	Dara J, Dow A, Cromwell E, Sturdevant CB, Mallewa M, Swanstrom R, Van Rie A, Prasad VR. Multivariable analysis to determine if HIV-1 Tat dicysteine motif is associated with neurodevelopmental delay in HIV-infected children in Malawi. Behav Brain Funct. 2015 Dec 17;11:38. doi: 10.1186/s12993-015-0083-7. PubMed PMID: 26678821; PubMed Central PMCID: PMC4683967.
250	72	2016	26678403	Aralaguppe SP, Sharma S, Menon M, Prasad VR, Saravanan S, Murugavel KG, Solomon S, Ranga U. The Evolving Profile of the Signature Amino Acid Residues in HIV-1 Subtype C Tat. AIDS Res Hum Retroviruses. 2016 May;32(5):503-14. doi: 10.1089/AID.2015.0208. Epub 2016 Feb 9. PubMed PMID: 26678403; PubMed Central PMCID: PMC5912721.
251	LNS	2015	26666681	Chavali AK, Wong VC, Miller-Jensen K. Distinct promoter activation mechanisms modulate noise-driven HIV gene expression. Sci Rep. 2015 Dec 15;5:17661. doi: 10.1038/srep17661. PubMed PMID: 26666681; PubMed Central PMCID: PMC4678399.
252	LNS	2015	26632198	Zhang HS, Liu Y, Wu TC, Du GY, Zhang FJ. EZH2 phosphorylation regulates Tat-induced HIV-1 transactivation via ROS/Akt signaling pathway. FEBS Lett. 2015 Dec 21;589(24 Pt B):4106-11. doi: 10.1016/j.febslet.2015.11.033. Epub 2015 Nov 26. PubMed PMID: 26632198.
253	PEP, 86, 101	2016	26611710	Fulcher AJ, Sivakumaran H, Jin H, Rawle DJ, Harrich D, Jans DA. The protein arginine methyltransferase PRMT6 inhibits HIV-1 Tat nucleolar retention. Biochim Biophys Acta. 2016 Feb;1863(2):254-62. doi: 10.1016/j.bbamcr.2015.11.019. Epub 2015 Dec 2. PubMed PMID: 26611710.
254	86	2015	26608746	Vivarini Áde C, Pereira Rde M, Barreto-de-Souza V, Temerozo JR, Soares DC, Saraiva EM, Saliba AM, Bou-Habib DC, Lopes UG. HIV-1 Tat protein enhances the intracellular growth of Leishmania amazonensis via the ds-RNA induced protein PKR. Sci Rep. 2015 Nov 26;5:16777. doi: 10.1038/srep16777. PubMed PMID: 26608746; PubMed Central PMCID: PMC4660360.
255	NAP	2015	26599333	Vandermeulen C, Hajingabo LJ, Twizere JC. Comparative Interactome of HIV-1 Tat and Human T Lymphotropic Virus Type-1 Tax and the Cellular Transcriptional Machinery. AIDS Res Hum Retroviruses. 2015 Dec;31(12):1204-5. doi: 10.1089/aid.2014.0377. Epub 2015 Jun 4. PubMed PMID: 26599333.
256	86	2016	26586575	Fatima M, Kumari R, Schwamborn JC, Mahadevan A, Shankar SK, Raja R, Seth P. Tripartite containing motif 32 modulates proliferation of human neural precursor cells in HIV-1 neurodegeneration. Cell Death Differ. 2016 May;23(5):776-86. doi: 10.1038/cdd.2015.138. Epub 2015 Nov 20. PubMed PMID: 26586575; PubMed Central PMCID: PMC4832097.
257	NTU	2016	26581953	Mousseau G, Valente ST. Didehydro-Cortistatin A: a new player in HIV-therapy? Expert Rev Anti Infect Ther. 2016;14(2):145-8. doi: 10.1586/14787210.2016.1122525. Epub 2015 Dec 11. PubMed PMID: 26581953; PubMed Central PMCID: PMC4793404.
258	LNS	2016	26581162	Saayman SM, Lazar DC, Scott TA, Hart JR, Takahashi M, Burnett JC, Planelles V, Morris KV, Weinberg MS. Potent and Targeted Activation of Latent HIV-1 Using the CRISPR/dCas9 Activator Complex. Mol Ther. 2016 Mar;24(3):488-98. doi: 10.1038/mt.2015.202. Epub 2015 Nov 19. PubMed PMID: 26581162; PubMed Central PMCID: PMC4786915.
259	PEP	2015	26575189	Karpowicz P, Osmulski PA, Witkowska J, Sikorska E, Giżyńska M, Belczyk-Ciesielska A, Gaczynska ME, Jankowska E. Interplay between Structure and Charge as a Key to Allosteric Modulation of Human 20S Proteasome by the Basic Fragment of HIV-1 Tat Protein. PLoS One. 2015 Nov 17;10(11):e0143038. doi: 10.1371/journal.pone.0143038. eCollection 2015. PubMed PMID: 26575189; PubMed Central PMCID: PMC464852…
260	LNS	2015	26569506	Wang C, Yang S, Lu H, You H, Ni M, Shan W, Lin T, Gao X, Chen H, Zhou Q, Xue Y. A Natural Product from Polygonum cuspidatum Sieb. Et Zucc. Promotes Tat-Dependent HIV Latency Reversal through Triggering P-TEFb's Release from 7SK snRNP. PLoS One. 2015 Nov 16;10(11):e0142739. doi: 10.1371/journal.pone.0142739. eCollection 2015. PubMed PMID: 26569506; PubMed Central PMCID: PMC4646521.
261	LNS	2016	26569339	Bhargavan B, Woollard SM, Kanmogne GD. Toll-like receptor-3 mediates HIV-1 transactivation via NFκB and JNK pathways and histone acetylation, but prolonged activation suppresses Tat and HIV-1 replication. Cell Signal. 2016 Feb;28(2):7-22. doi: 10.1016/j.cellsig.2015.11.005. Epub 2015 Nov 11. PubMed PMID: 26569339; PubMed Central PMCID: PMC4890564.
262	86	2015	26559763	Haqqani AA, Marek SL, Kumar J, Davenport M, Wang H, Tilton JC. Central memory CD4+ T cells are preferential targets of double infection by HIV-1. Virol J. 2015 Nov 11;12:184. doi: 10.1186/s12985-015-0415-0. PubMed PMID: 26559763; PubMed Central PMCID: PMC4642630.
263	LNS	2015	26554585	Langer SM, Hopfensperger K, Iyer SS, Kreider EF, Learn GH, Lee LH, Hahn BH, Sauter D. A Naturally Occurring rev1-vpu Fusion Gene Does Not Confer a Fitness Advantage to HIV-1. PLoS One. 2015 Nov 10;10(11):e0142118. doi: 10.1371/journal.pone.0142118. eCollection 2015. PubMed PMID: 26554585; PubMed Central PMCID: PMC4640844.
264	86	2016	26542403	Fitting S, Stevens DL, Khan FA, Scoggins KL, Enga RM, Beardsley PM, Knapp PE, Dewey WL, Hauser KF. Morphine Tolerance and Physical Dependence Are Altered in Conditional HIV-1 Tat Transgenic Mice. J Pharmacol Exp Ther. 2016 Jan;356(1):96-105. doi: 10.1124/jpet.115.226407. Epub 2015 Nov 5. PubMed PMID: 26542403; PubMed Central PMCID: PMC4702077.
265	86, 101	2015	26534959	Kadri F, Pacifici M, Wilk A, Parker-Struckhoff A, Del Valle L, Hauser KF, Knapp PE, Parsons C, Jeansonne D, Lassak A, Peruzzi F. HIV-1-Tat Protein Inhibits SC35-mediated Tau Exon 10 Inclusion through Up-regulation of DYRK1A Kinase. J Biol Chem. 2015 Dec 25;290(52):30931-46. doi: 10.1074/jbc.M115.675751. Epub 2015 Nov 3. PubMed PMID: 26534959; PubMed Central PMCID: PMC4692221.
266	86	2016	26501780	Zhu J, Yuan Y, Midde NM, Gomez AM, Sun WL, Quizon PM, Zhan CG. HIV-1 transgenic rats display an increase in [(3)H]dopamine uptake in the prefrontal cortex and striatum. J Neurovirol. 2016 Jun;22(3):282-92. doi: 10.1007/s13365-015-0391-6. Epub 2015 Oct 26. PubMed PMID: 26501780; PubMed Central PMCID: PMC5330645.
267	86	2015	26495836	Guo R, Wang H, Cui J, Wang G, Li W, Hu JF. Inhibition of HIV-1 Viral Infection by an Engineered CRISPR Csy4 RNA Endoribonuclease. PLoS One. 2015 Oct 23;10(10):e0141335. doi: 10.1371/journal.pone.0141335. eCollection 2015. PubMed PMID: 26495836; PubMed Central PMCID: PMC4619743.
268	PEP	2015	26492372	Gamir-Morralla A, López-Menéndez C, Ayuso-Dolado S, Tejeda GS, Montaner J, Rosell A, Iglesias T, Díaz-Guerra M. Development of a neuroprotective peptide that preserves survival pathways by preventing Kidins220/ARMS calpain processing induced by excitotoxicity. Cell Death Dis. 2015 Oct 22;6:e1939. doi: 10.1038/cddis.2015.307. PubMed PMID: 26492372; PubMed Central PMCID: PMC4632323.
269	PEP	2015	26449409	Kenyon JC, Prestwood LJ, Lever AM. A novel combined RNA-protein interaction analysis distinguishes HIV-1 Gag protein binding sites from structural change in the viral RNA leader. Sci Rep. 2015 Oct 9;5:14369. doi: 10.1038/srep14369. PubMed PMID: 26449409; PubMed Central PMCID: PMC4598872.
270	LNS	2015	26446987	Yao S, Hu M, Hao T, Li W, Xue X, Xue M, Zhu X, Zhou F, Qin D, Yan Q, Zhu J, Gao SJ, Lu C. MiRNA-891a-5p mediates HIV-1 Tat and KSHV Orf-K1 synergistic induction of angiogenesis by activating NF-κB signaling. Nucleic Acids Res. 2015 Oct 30;43(19):9362-78. doi: 10.1093/nar/gkv988. Epub 2015 Oct 7. Erratum in: Nucleic Acids Res. 2019 Mar 18;47(5):2700. PubMed PMID: 26446987; PubMed Central PMCID: PM…
271	86	2015	26441850	Bertrand SJ, Hu C, Aksenova MV, Mactutus CF, Booze RM. HIV-1 Tat and cocaine mediated synaptopathy in cortical and midbrain neurons is prevented by the isoflavone Equol. Front Microbiol. 2015 Sep 8;6:894. doi: 10.3389/fmicb.2015.00894. eCollection 2015. PubMed PMID: 26441850; PubMed Central PMCID: PMC4561964.
272	NTU	2015	26425694	Procopio FA, Fromentin R, Kulpa DA, Brehm JH, Bebin AG, Strain MC, Richman DD, O'Doherty U, Palmer S, Hecht FM, Hoh R, Barnard RJ, Miller MD, Hazuda DJ, Deeks SG, Sékaly RP, Chomont N. A Novel Assay to Measure the Magnitude of the Inducible Viral Reservoir in HIV-infected Individuals. EBioMedicine. 2015 Jun 27;2(8):874-83. doi: 10.1016/j.ebiom.2015.06.019. eCollection 2015 Aug. PubMed PMID: 26425…
273	NTU	2016	26407718	Khan MB, Lang MJ, Huang MB, Raymond A, Bond VC, Shiramizu B, Powell MD. Nef exosomes isolated from the plasma of individuals with HIV-associated dementia (HAD) can induce Aβ(1-42) secretion in SH-SY5Y neural cells. J Neurovirol. 2016 Apr;22(2):179-90. doi: 10.1007/s13365-015-0383-6. Epub 2015 Sep 25. PubMed PMID: 26407718; PubMed Central PMCID: PMC4783240.
274	PEP	2015	26402709	Neale C, Huang K, García AE, Tristram-Nagle S. Penetration of HIV-1 Tat47-57 into PC/PE Bilayers Assessed by MD Simulation and X-ray Scattering. Membranes (Basel). 2015 Sep 22;5(3):473-94. doi: 10.3390/membranes5030473. PubMed PMID: 26402709; PubMed Central PMCID: PMC4584291.
275	101	2015	26379653	Rom S, Reichenbach NL, Dykstra H, Persidsky Y. The dual action of poly(ADP-ribose) polymerase -1 (PARP-1) inhibition in HIV-1 infection: HIV-1 LTR inhibition and diminution in Rho GTPase activity. Front Microbiol. 2015 Aug 25;6:878. doi: 10.3389/fmicb.2015.00878. eCollection 2015. PubMed PMID: 26379653; PubMed Central PMCID: PMC4548080.
276	LNS	2015	26378236	Huang H, Santoso N, Power D, Simpson S, Dieringer M, Miao H, Gurova K, Giam CZ, Elledge SJ, Zhu J. FACT Proteins, SUPT16H and SSRP1, Are Transcriptional Suppressors of HIV-1 and HTLV-1 That Facilitate Viral Latency. J Biol Chem. 2015 Nov 6;290(45):27297-310. doi: 10.1074/jbc.M115.652339. Epub 2015 Sep 16. PubMed PMID: 26378236; PubMed Central PMCID: PMC4646377.
277	72, 101	2015	26376973	Rodríguez-Mora S, Mateos E, Moran M, Martín MÁ, López JA, Calvo E, Terrón MC, Luque D, Muriaux D, Alcamí J, Coiras M, López-Huertas MR. Intracellular expression of Tat alters mitochondrial functions in T cells: a potential mechanism to understand mitochondrial damage during HIV-1 replication. Retrovirology. 2015 Sep 16;12:78. doi: 10.1186/s12977-015-0203-3. PubMed PMID: 26376973; PubMed Central P…
278	86	2015	26366056	Kumari N, Kulkarni AA, Lin X, McLean C, Ammosova T, Ivanov A, Hipolito M, Nekhai S, Nwulia E. Inhibition of HIV-1 by curcumin A, a novel curcumin analog. Drug Des Devel Ther. 2015 Sep 3;9:5051-60. doi: 10.2147/DDDT.S86558. eCollection 2015. PubMed PMID: 26366056; PubMed Central PMCID: PMC4562762.
279	86	2015	26343909	Fiume G, Scialdone A, Albano F, Rossi A, Tuccillo FM, Rea D, Palmieri C, Caiazzo E, Cicala C, Bellevicine C, Falcone C, Vecchio E, Pisano A, Ceglia S, Mimmi S, Iaccino E, de Laurentiis A, Pontoriero M, Agosti V, Troncone G, Mignogna C, Palma G, Arra C, Mallardo M, Buonaguro FM, Scala G, Quinto I. Impairment of T cell development and acute inflammatory response in HIV-1 Tat transgenic mice. Sci Re…
280	86	2015	26309721	Nkeze J, Li L, Benko Z, Li G, Zhao RY. Molecular characterization of HIV-1 genome in fission yeast Schizosaccharomyces pombe. Cell Biosci. 2015 Aug 25;5:47. doi: 10.1186/s13578-015-0037-7. eCollection 2015. PubMed PMID: 26309721; PubMed Central PMCID: PMC4549081.
281	NTU	2015	26309074	Daussy CF, Beaumelle B, Espert L. Autophagy restricts HIV-1 infection. Oncotarget. 2015 Aug 28;6(25):20752-3. PubMed PMID: 26309074; PubMed Central PMCID: PMC4673226.
282	86	2015	26307267	Koczor CA, Fields E, Jedrzejczak MJ, Jiao Z, Ludaway T, Russ R, Shang J, Torres RA, Lewis W. Methamphetamine and HIV-Tat alter murine cardiac DNA methylation and gene expression. Toxicol Appl Pharmacol. 2015 Nov 1;288(3):409-19. doi: 10.1016/j.taap.2015.08.012. Epub 2015 Aug 22. PubMed PMID: 26307267; PubMed Central PMCID: PMC4605882.
283	86	2015	26300236	Cheung JY, Gordon J, Wang J, Song J, Zhang XQ, Tilley DG, Gao E, Koch WJ, Rabinowitz J, Klotman PE, Khalili K, Feldman AM. Cardiac Dysfunction in HIV-1 Transgenic Mouse: Role of Stress and BAG3. Clin Transl Sci. 2015 Aug;8(4):305-10. doi: 10.1111/cts.12331. Epub 2015 Aug 24. PubMed PMID: 26300236; PubMed Central PMCID: PMC4841629.
284	NTU	2015	26286696	Planelles V. An Ounce of Tat Prevention Is Worth a Pound of Functional Cure. MBio. 2015 Aug 18;6(4). pii: e01269-15. doi: 10.1128/mBio.01269-15. PubMed PMID: 26286696; PubMed Central PMCID: PMC4542193.
285	NTU	2015	26272647	Krishnan G, Chatterjee N. Erratum: Differential immune mechanism to HIV-1 Tat variants and its regulation by AEA. Sci Rep. 2015 Aug 14;5:12206. doi: 10.1038/srep12206. PubMed PMID: 26272647; PubMed Central PMCID: PMC4536534.
286	86	2015	26269645	Zou S, Fuss B, Fitting S, Hahn YK, Hauser KF, Knapp PE. Oligodendrocytes Are Targets of HIV-1 Tat: NMDA and AMPA Receptor-Mediated Effects on Survival and Development. J Neurosci. 2015 Aug 12;35(32):11384-98. doi: 10.1523/JNEUROSCI.4740-14.2015. PubMed PMID: 26269645; PubMed Central PMCID: PMC4532766.
287	86	2015	26217309	Dever SM, Rodriguez M, Lapierre J, Costin BN, El-Hage N. Differing roles of autophagy in HIV-associated neurocognitive impairment and encephalitis with implications for morphine co-exposure. Front Microbiol. 2015 Jul 6;6:653. doi: 10.3389/fmicb.2015.00653. eCollection 2015. PubMed PMID: 26217309; PubMed Central PMCID: PMC4491626.
288	NTU	2015	26215448	Berkhout B, van der Velden YU. ABX464: a good drug candidate instead of a magic bullet. Retrovirology. 2015 Jul 28;12:64. doi: 10.1186/s12977-015-0189-x. PubMed PMID: 26215448; PubMed Central PMCID: PMC4515925.
289	101	2015	26187042	Africa LD, Smith C. Sutherlandia frutescens may exacerbate HIV-associated neuroinflammation. J Negat Results Biomed. 2015 Jul 18;14:14. doi: 10.1186/s12952-015-0031-y. PubMed PMID: 26187042; PubMed Central PMCID: PMC4506629.
290	101	2015	26152583	Mousseau G, Kessing CF, Fromentin R, Trautmann L, Chomont N, Valente ST. The Tat Inhibitor Didehydro-Cortistatin A Prevents HIV-1 Reactivation from Latency. MBio. 2015 Jul 7;6(4):e00465. doi: 10.1128/mBio.00465-15. PubMed PMID: 26152583; PubMed Central PMCID: PMC4495168.
291	86	2015	26150803	Zhu J, Midde NM, Gomez AM, Sun WL, Harrod SB. Intra-ventral tegmental area HIV-1 Tat1-86 attenuates nicotine-mediated locomotor sensitization and alters mesocorticolimbic ERK and CREB signaling in rats. Front Microbiol. 2015 Jun 19;6:540. doi: 10.3389/fmicb.2015.00540. eCollection 2015. PubMed PMID: 26150803; PubMed Central PMCID: PMC4473058.
292	72	2015	26123213	Monit C, Goldstein RA, Towers G, Hué S. Positive Selection Analysis of Overlapping Reading Frames Is Invalid. AIDS Res Hum Retroviruses. 2015 Oct;31(10):947. doi: 10.1089/AID.2015.0150. Epub 2015 Jul 22. PubMed PMID: 26123213; PubMed Central PMCID: PMC5118959.
293	PEP	2015	26110264	Ramos-Molina B, Lick AN, Nasrolahi Shirazi A, Oh D, Tiwari R, El-Sayed NS, Parang K, Lindberg I. Cationic Cell-Penetrating Peptides Are Potent Furin Inhibitors. PLoS One. 2015 Jun 25;10(6):e0130417. doi: 10.1371/journal.pone.0130417. eCollection 2015. PubMed PMID: 26110264; PubMed Central PMCID: PMC4482483.
294	PEP	2015	26091071	Li S, Hou H, Mori T, Sawmiller D, Smith A, Tian J, Wang Y, Giunta B, Sanberg PR, Zhang S, Tan J. Swedish mutant APP-based BACE1 binding site peptide reduces APP β-cleavage and cerebral Aβ levels in Alzheimer's mice. Sci Rep. 2015 Jun 19;5:11322. doi: 10.1038/srep11322. PubMed PMID: 26091071; PubMed Central PMCID: PMC4473678.
295	86, 101	2015	26090662	Ben Haij N, Planès R, Leghmari K, Serrero M, Delobel P, Izopet J, BenMohamed L, Bahraoui E. HIV-1 Tat Protein Induces Production of Proinflammatory Cytokines by Human Dendritic Cells and Monocytes/Macrophages through Engagement of TLR4-MD2-CD14 Complex and Activation of NF-κB Pathway. PLoS One. 2015 Jun 19;10(6):e0129425. doi: 10.1371/journal.pone.0129425. eCollection 2015. PubMed PMID: 26090662;…
296	PEP	2015	26087960	Dutta R, Roy S. Chronic morphine and HIV-1 Tat promote differential central nervous system trafficking of CD3+ and Ly6C+ immune cells in a murine Streptococcus pneumoniae infection model. J Neuroinflammation. 2015 Jun 20;12:120. doi: 10.1186/s12974-015-0341-5. PubMed PMID: 26087960; PubMed Central PMCID: PMC4490693.
297	LNS	2015	26087118	Roy CN, Khandaker I, Oshitani H. Evolutionary Dynamics of Tat in HIV-1 Subtypes B and C. PLoS One. 2015 Jun 18;10(6):e0129896. doi: 10.1371/journal.pone.0129896. eCollection 2015. PubMed PMID: 26087118; PubMed Central PMCID: PMC4472691.
298	LNS	2015	26077977	Farazmandfar T, Haghshenas MR, Shahbazi M. Inhibition of HIV-1 by a Lentiviral Vector with a Novel Tat-Inducible Expression System and a Specific Tropism to the Target Cells. Hum Gene Ther. 2015 Oct;26(10):680-7. doi: 10.1089/hum.2015.031. Epub 2015 Aug 6. PubMed PMID: 26077977; PubMed Central PMCID: PMC4630793.
299	86	2015	26043820	Chauhan A. Enigma of HIV-1 latent infection in astrocytes: an in-vitro study using protein kinase C agonist as a latency reversing agent. Microbes Infect. 2015 Sep;17(9):651-9. doi: 10.1016/j.micinf.2015.05.006. Epub 2015 Jun 2. PubMed PMID: 26043820; PubMed Central PMCID: PMC4596409.
300	101	2015	26023685	Niu F, Yao H, Liao K, Buch S. HIV Tat 101-mediated loss of pericytes at the blood-brain barrier involves PDGF-BB. Ther Targets Neurol Dis. 2015;2(1). pii: e471. PubMed PMID: 26023685; PubMed Central PMCID: PMC4444060.
301	LNS	2015	26021911	Kusagawa S, Yokota Y, Negishi M, Kondo M, Matano T, Kato S, Takebe Y. Novel HIV-1 Recombinant Identified in a Foreign Heterosexual Resident in Japan: Relatedness to Recently Reported CRF69_01B, Detected Primarily among Japanese Men Who Have Sex with Men. Genome Announc. 2015 May 28;3(3). pii: e00196-15. doi: 10.1128/genomeA.00196-15. PubMed PMID: 26021911; PubMed Central PMCID: PMC4447896.
302	LNS	2015	26007649	Lu H, Li Z, Zhang W, Schulze-Gahmen U, Xue Y, Zhou Q. Gene target specificity of the Super Elongation Complex (SEC) family: how HIV-1 Tat employs selected SEC members to activate viral transcription. Nucleic Acids Res. 2015 Jul 13;43(12):5868-79. doi: 10.1093/nar/gkv541. Epub 2015 May 24. PubMed PMID: 26007649; PubMed Central PMCID: PMC4499153.
303	86	2015	26005128	Paris JJ, Singh HD, Carey AN, McLaughlin JP. Exposure to HIV-1 Tat in brain impairs sensorimotor gating and activates microglia in limbic and extralimbic brain regions of male mice. Behav Brain Res. 2015 Sep 15;291:209-218. doi: 10.1016/j.bbr.2015.05.021. Epub 2015 May 22. PubMed PMID: 26005128; PubMed Central PMCID: PMC4497922.
304	LNS	2015	25973004	Fu E, Pan L, Xie Y, Mu D, Liu W, Jin F, Bai X. Tetraspanin CD63 is a regulator of HIV-1 replication. Int J Clin Exp Pathol. 2015 Feb 1;8(2):1184-98. eCollection 2015. PubMed PMID: 25973004; PubMed Central PMCID: PMC4396296.
305	101	2015	25943894	Krishnan G, Chatterjee N. Differential immune mechanism to HIV-1 Tat variants and its regulation by AEA [corrected]. Sci Rep. 2015 May 6;5:9887. doi: 10.1038/srep09887. Erratum in: Sci Rep. 2015;5:12206. PubMed PMID: 25943894; PubMed Central PMCID: PMC4421801.
306	86, 101	2015	25926654	Contreras-Galindo R, Kaplan MH, Dube D, Gonzalez-Hernandez MJ, Chan S, Meng F, Dai M, Omenn GS, Gitlin SD, Markovitz DM. Human Endogenous Retrovirus Type K (HERV-K) Particles Package and Transmit HERV-K-Related Sequences. J Virol. 2015 Jul;89(14):7187-201. doi: 10.1128/JVI.00544-15. Epub 2015 Apr 29. PubMed PMID: 25926654; PubMed Central PMCID: PMC4473553.
307	LNS	2015	25924841	Ensoli F, Cafaro A, Casabianca A, Tripiciano A, Bellino S, Longo O, Francavilla V, Picconi O, Sgadari C, Moretti S, Cossut MR, Arancio A, Orlandi C, Sernicola L, Maggiorella MT, Paniccia G, Mussini C, Lazzarin A, Sighinolfi L, Palamara G, Gori A, Angarano G, Di Pietro M, Galli M, Mercurio VS, Castelli F, Di Perri G, Monini P, Magnani M, Garaci E, Ensoli B. HIV-1 Tat immunization restores immune h…
308	NTU	2015	25914449	Roy CN, Khandaker I, Furuse Y, Oshitani H. Molecular characterization of full-length Tat in HIV-1 subtypes B and C. Bioinformation. 2015 Mar 31;11(3):151-60. doi: 10.6026/97320630011151. eCollection 2015. PubMed PMID: 25914449; PubMed Central PMCID: PMC4403036.
309	PEP	2015	25909811	Jin HX, Go ML, Yin P, Qiu XT, Zhu P, Yan XJ. Determining the Functions of HIV-1 Tat and a Second Magnesium Ion in the CDK9/Cyclin T1 Complex: A Molecular Dynamics Simulation Study. PLoS One. 2015 Apr 24;10(4):e0124673. doi: 10.1371/journal.pone.0124673. eCollection 2015. PubMed PMID: 25909811; PubMed Central PMCID: PMC4409394.
310	LNS	2015	25900325	Mbonye UR, Wang B, Gokulrangan G, Chance MR, Karn J. Phosphorylation of HEXIM1 at Tyr271 and Tyr274 Promotes Release of P-TEFb from the 7SK snRNP Complex and Enhances Proviral HIV Gene Expression. Proteomics. 2015 Jun;15(12):2078-86. doi: 10.1002/pmic.201500038. Epub 2015 May 15. Erratum in: Proteomics. 2016 Aug;16(15-16):2302. PubMed PMID: 25900325; PubMed Central PMCID: PMC4487608.
311	LNS	2015	25893035	Kim SH, Smith AJ, Tan J, Shytle RD, Giunta B. MSM ameliorates HIV-1 Tat induced neuronal oxidative stress via rebalance of the glutathione cycle. Am J Transl Res. 2015 Feb 15;7(2):328-38. eCollection 2015. PubMed PMID: 25893035; PubMed Central PMCID: PMC4399096.
312	86	2015	25889056	Erkelenz S, Hillebrand F, Widera M, Theiss S, Fayyaz A, Degrandi D, Pfeffer K, Schaal H. Balanced splicing at the Tat-specific HIV-1 3'ss A3 is critical for HIV-1 replication. Retrovirology. 2015 Mar 28;12:29. doi: 10.1186/s12977-015-0154-8. PubMed PMID: 25889056; PubMed Central PMCID: PMC4422144.
313	86	2015	25880773	Harricharan R, Thaver V, Russell VA, Daniels WM. Tat-induced histopathological alterations mediate hippocampus-associated behavioural impairments in rats. Behav Brain Funct. 2015 Feb 7;11:3. doi: 10.1186/s12993-014-0047-3. PubMed PMID: 25880773; PubMed Central PMCID: PMC4333156.
314	101	2015	25879655	Guendel I, Meltzer BW, Baer A, Dever SM, Valerie K, Guo J, Wu Y, Kehn-Hall K. BRCA1 functions as a novel transcriptional cofactor in HIV-1 infection. Virol J. 2015 Mar 6;12:40. doi: 10.1186/s12985-015-0266-8. PubMed PMID: 25879655; PubMed Central PMCID: PMC4359766.
315	72, 101	2015	25853889	Pereira LA, Hugo HJ, Malaterre J, Huiling X, Sonza S, Cures A, Purcell DF, Ramsland PA, Gerondakis S, Gonda TJ, Ramsay RG. MYB elongation is regulated by the nucleic acid binding of NFκB p50 to the intronic stem-loop region. PLoS One. 2015 Apr 8;10(4):e0122919. doi: 10.1371/journal.pone.0122919. eCollection 2015. PubMed PMID: 25853889; PubMed Central PMCID: PMC4390348.
316	86, 101	2015	25834052	Puccini JM, Marker DF, Fitzgerald T, Barbieri J, Kim CS, Miller-Rhodes P, Lu SM, Dewhurst S, Gelbard HA. Leucine-rich repeat kinase 2 modulates neuroinflammation and neurotoxicity in models of human immunodeficiency virus 1-associated neurocognitive disorders. J Neurosci. 2015 Apr 1;35(13):5271-83. doi: 10.1523/JNEUROSCI.0650-14.2015. PubMed PMID: 25834052; PubMed Central PMCID: PMC4381000.
317	LNS	2015	25818668	Chappell CA, Isaacs CE, Xu W, Meyn LA, Uranker K, Dezzutti CS, Moncla BJ, Hillier SL. The effect of menopause on the innate antiviral activity of cervicovaginal lavage. Am J Obstet Gynecol. 2015 Aug;213(2):204.e1-6. doi: 10.1016/j.ajog.2015.03.045. Epub 2015 Mar 25. PubMed PMID: 25818668; PubMed Central PMCID: PMC4519412.
318	PEP	2015	25810888	Rahimi R, Ebtekar M, Moazzeni SM, Mostafaie A, Mahdavi M. Optimization of multi-epitopic HIV-1 recombinant protein expression in prokaryote system and conjugation to mouse DEC-205 monoclonal antibody: implication for in-vivo targeted delivery of dendritic cells. Iran J Basic Med Sci. 2015 Feb;18(2):145-52. PubMed PMID: 25810888; PubMed Central PMCID: PMC4366725.
319	PEP	2015	25781978	Asamitsu K, Hirokawa T, Hibi Y, Okamoto T. Molecular dynamics simulation and experimental verification of the interaction between cyclin T1 and HIV-1 Tat proteins. PLoS One. 2015 Mar 17;10(3):e0119451. doi: 10.1371/journal.pone.0119451. eCollection 2015. PubMed PMID: 25781978; PubMed Central PMCID: PMC4363469.
320	86	2014	25760046	Fitting S, Zou S, El-Hage N, Suzuki M, Paris JJ, Schier CJ, Rodríguez JW, Rodriguez M, Knapp PE, Hauser KF. Opiate addiction therapies and HIV-1 Tat: interactive effects on glial [Ca²⁺]i, oxyradical and neuroinflammatory chemokine production and correlative neurotoxicity. Curr HIV Res. 2014;12(6):424-34. PubMed PMID: 25760046; PubMed Central PMCID: PMC4475822.
321	86	2015	25760045	Hahn YK, Masvekar RR, Xu R, Hauser KF, Knapp PE. Chronic HIV-1 Tat and HIV reduce Rbfox3/NeuN: evidence for sex-related effects. Curr HIV Res. 2015;13(1):10-20. PubMed PMID: 25760045; PubMed Central PMCID: PMC4665621.
322	LNS	2015	25710909	Kaczmarek Michaels K, Natarajan M, Euler Z, Alter G, Viglianti G, Henderson AJ. Blimp-1, an intrinsic factor that represses HIV-1 proviral transcription in memory CD4+ T cells. J Immunol. 2015 Apr 1;194(7):3267-74. doi: 10.4049/jimmunol.1402581. Epub 2015 Feb 20. PubMed PMID: 25710909; PubMed Central PMCID: PMC4369419.
323	86	2015	25707266	Wayman WN, Chen L, Napier TC, Hu XT. Cocaine self-administration enhances excitatory responses of pyramidal neurons in the rat medial prefrontal cortex to human immunodeficiency virus-1 Tat. Eur J Neurosci. 2015 May;41(9):1195-206. doi: 10.1111/ejn.12853. Epub 2015 Feb 24. PubMed PMID: 25707266; PubMed Central PMCID: PMC4533983.
324	86	2014	25705251	Luzzi A, Morettini F, Gazaneo S, Mundo L, Onnis A, Mannucci S, Rogena EA, Bellan C, Leoncini L, De Falco G. HIV-1 Tat induces DNMT over-expression through microRNA dysregulation in HIV-related non Hodgkin lymphomas. Infect Agent Cancer. 2014 Dec 9;9:41. doi: 10.1186/1750-9378-9-41. eCollection 2014. PubMed PMID: 25705251; PubMed Central PMCID: PMC4334912.
325	86	2015	25703354	Fitting S, Ngwainmbi J, Kang M, Khan FA, Stevens DL, Dewey WL, Knapp PE, Hauser KF, Akbarali HI. Sensitization of enteric neurons to morphine by HIV-1 Tat protein. Neurogastroenterol Motil. 2015 Apr;27(4):468-80. doi: 10.1111/nmo.12514. Epub 2015 Feb 19. PubMed PMID: 25703354; PubMed Central PMCID: PMC4380805.
326	86	2015	25695767	Yuan Y, Huang X, Midde NM, Quizon PM, Sun WL, Zhu J, Zhan CG. Molecular mechanism of HIV-1 Tat interacting with human dopamine transporter. ACS Chem Neurosci. 2015 Apr 15;6(4):658-665. doi: 10.1021/acschemneuro.5b00001. Epub 2015 Feb 19. PubMed PMID: 25695767; PubMed Central PMCID: PMC4400243.
327	101	2015	25673710	Lin MH, Apolloni A, Cutillas V, Sivakumaran H, Martin S, Li D, Wei T, Wang R, Jin H, Spann K, Harrich D. A mutant tat protein inhibits HIV-1 reverse transcription by targeting the reverse transcription complex. J Virol. 2015 May;89(9):4827-36. doi: 10.1128/JVI.03440-14. Epub 2015 Feb 11. PubMed PMID: 25673710; PubMed Central PMCID: PMC4403448.
328	PEP	2015	25664981	Lyons MM, Raj NN, Chittams JL, Kilpatrick L, Deutschman CS. TAT-HSP70 Attenuates Experimental Lung Injury. Shock. 2015 Jun;43(6):582-8. doi: 10.1097/SHK.0000000000000352. PubMed PMID: 25664981; PubMed Central PMCID: PMC4433584.
329	LNS	2015	25664610	Vemula SV, Veerasamy R, Ragupathy V, Biswas S, Devadas K, Hewlett I. HIV-1 induced nuclear factor I-B (NF-IB) expression negatively regulates HIV-1 replication through interaction with the long terminal repeat region. Viruses. 2015 Feb 5;7(2):543-58. doi: 10.3390/v7020543. PubMed PMID: 25664610; PubMed Central PMCID: PMC4353903.
330	LNS	2015	25653431	Yoon CH, Kim SY, Byeon SE, Jeong Y, Lee J, Kim KP, Park J, Bae YS. p53-derived host restriction of HIV-1 replication by protein kinase R-mediated Tat phosphorylation and inactivation. J Virol. 2015 Apr;89(8):4262-80. doi: 10.1128/JVI.03087-14. Epub 2015 Feb 4. Erratum in: J Virol. 2017 Nov 14;91(23 ):. PubMed PMID: 25653431; PubMed Central PMCID: PMC4442402.
331	86	2015	25653352	Fields J, Dumaop W, Eleuteri S, Campos S, Serger E, Trejo M, Kosberg K, Adame A, Spencer B, Rockenstein E, He JJ, Masliah E. HIV-1 Tat alters neuronal autophagy by modulating autophagosome fusion to the lysosome: implications for HIV-associated neurocognitive disorders. J Neurosci. 2015 Feb 4;35(5):1921-38. doi: 10.1523/JNEUROSCI.3207-14.2015. Erratum in: J Neurosci. 2015 May 27;35(21):8376. Elue…
332	72	2015	25636783	Singh VB, Wooten AK, Jackson JW, Maggirwar SB, Kiebala M. Investigating the role of ankyrin-rich membrane spanning protein in human immunodeficiency virus type-1 Tat-induced microglia activation. J Neurovirol. 2015 Apr;21(2):186-98. doi: 10.1007/s13365-015-0318-2. Epub 2015 Jan 31. PubMed PMID: 25636783; PubMed Central PMCID: PMC4375029.
333	101	2015	25616162	Masvekar RR, El-Hage N, Hauser KF, Knapp PE. GSK3β-activation is a point of convergence for HIV-1 and opiate-mediated interactive neurotoxicity. Mol Cell Neurosci. 2015 Mar;65:11-20. doi: 10.1016/j.mcn.2015.01.001. Epub 2015 Jan 20. PubMed PMID: 25616162; PubMed Central PMCID: PMC4393771.
334	72	2014	25613139	Stevens PR, Gawryluk JW, Hui L, Chen X, Geiger JD. Creatine protects against mitochondrial dysfunction associated with HIV-1 Tat-induced neuronal injury. Curr HIV Res. 2014;12(6):378-87. PubMed PMID: 25613139; PubMed Central PMCID: PMC4372859.
335	86	2014	25613138	Samikkannu T, Atluri VS, Arias AY, Rao KV, Mulet CT, Jayant RD, Nair MP. HIV-1 subtypes B and C Tat differentially impact synaptic plasticity expression and implicates HIV-associated neurocognitive disorders. Curr HIV Res. 2014;12(6):397-405. PubMed PMID: 25613138; PubMed Central PMCID: PMC4554345.
336	86	2014	25613137	Paris JJ, Fenwick J, McLaughlin JP. Estrous cycle and HIV-1 Tat protein influence cocaine-conditioned place preference and induced locomotion of female mice. Curr HIV Res. 2014;12(6):388-96. PubMed PMID: 25613137; PubMed Central PMCID: PMC6488030.
337	86	2014	25613136	Krogh KA, Green MV, Thayer SA. HIV-1 Tat-induced changes in synaptically-driven network activity adapt during prolonged exposure. Curr HIV Res. 2014;12(6):406-14. PubMed PMID: 25613136; PubMed Central PMCID: PMC4394384.
338	86	2015	25613134	Fan Y, Timani KA, He JJ. STAT3 and its phosphorylation are involved in HIV-1 Tat-induced transactivation of glial fibrillary acidic protein. Curr HIV Res. 2015;13(1):55-63. PubMed PMID: 25613134; PubMed Central PMCID: PMC5429041.
339	PEP, 86	2015	25613133	Mediouni S, Jablonski J, Paris JJ, Clementz MA, Thenin-Houssier S, McLaughlin JP, Valente ST. Didehydro-cortistatin A inhibits HIV-1 Tat mediated neuroinflammation and prevents potentiation of cocaine reward in Tat transgenic mice. Curr HIV Res. 2015;13(1):64-79. PubMed PMID: 25613133; PubMed Central PMCID: PMC4416414.
340	86	2015	25604666	Midde NM, Yuan Y, Quizon PM, Sun WL, Huang X, Zhan CG, Zhu J. Mutations at tyrosine 88, lysine 92 and tyrosine 470 of human dopamine transporter result in an attenuation of HIV-1 Tat-induced inhibition of dopamine transport. J Neuroimmune Pharmacol. 2015 Mar;10(1):122-35. doi: 10.1007/s11481-015-9583-3. Epub 2015 Jan 22. PubMed PMID: 25604666; PubMed Central PMCID: PMC4388869.
341	LNS	2014	25564443	Likhoshvai VA, Khlebodarova TM, Bazhan SI, Gainova IA, Chereshnev VA, Bocharov GA. Mathematical model of the Tat-Rev regulation of HIV-1 replication in an activated cell predicts the existence of oscillatory dynamics in the synthesis of viral components. BMC Genomics. 2014;15 Suppl 12:S1. doi: 10.1186/1471-2164-15-S12-S1. Epub 2014 Dec 19. PubMed PMID: 25564443; PubMed Central PMCID: PMC4303933.
342	LNS	2015	25557407	Ellis K, Marlin JW, Taylor TA, Fitting S, Hauser KF, Rice G, McRae M. The effects of human immunodeficiency virus infection on the expression of the drug efflux proteins P-glycoprotein and breast cancer resistance protein in a human intestine model. J Pharm Pharmacol. 2015 Feb;67(2):178-88. doi: 10.1111/jphp.12329. Epub 2014 Dec 31. PubMed PMID: 25557407; PubMed Central PMCID: PMC4306588.
343	NTU	2015	25544767	Bu F, Liu X, Li J, Chen S, Tong X, Ma C, Mao H, Pan F, Li X, Chen B, Xu L, Li E, Kou G, Han J, Guo S, Zhao J, Guo Y. TGF-β1 induces epigenetic silence of TIP30 to promote tumor metastasis in esophageal carcinoma. Oncotarget. 2015 Feb 10;6(4):2120-33. PubMed PMID: 25544767; PubMed Central PMCID: PMC4385840.
344	86	2014	25539898	Nookala AR, Kumar A. Molecular mechanisms involved in HIV-1 Tat-mediated induction of IL-6 and IL-8 in astrocytes. J Neuroinflammation. 2014 Dec 24;11:214. doi: 10.1186/s12974-014-0214-3. PubMed PMID: 25539898; PubMed Central PMCID: PMC4302610.
345	101	2014	25531437	Kashi VP, Jacob RA, Shamanna RA, Menon M, Balasiddaiah A, Varghese RK, Bachu M, Ranga U. The grafting of universal T-helper epitopes enhances immunogenicity of HIV-1 Tat concurrently improving its safety profile. PLoS One. 2014 Dec 22;9(12):e114155. doi: 10.1371/journal.pone.0114155. eCollection 2014. PubMed PMID: 25531437; PubMed Central PMCID: PMC4273983.
346	NTU	2014	25517412	Cassim N, Coetzee LM, Schnippel K, Glencross DK. Estimating implementation and operational costs of an integrated tiered CD4 service including laboratory and point of care testing in a remote health district in South Africa. PLoS One. 2014 Dec 17;9(12):e115420. doi: 10.1371/journal.pone.0115420. eCollection 2014. PubMed PMID: 25517412; PubMed Central PMCID: PMC4269438.
347	101	2014	25496916	Lin MH, Sivakumaran H, Jones A, Li D, Harper C, Wei T, Jin H, Rustanti L, Meunier FA, Spann K, Harrich D. A HIV-1 Tat mutant protein disrupts HIV-1 Rev function by targeting the DEAD-box RNA helicase DDX1. Retrovirology. 2014 Dec 14;11:121. doi: 10.1186/s12977-014-0121-9. PubMed PMID: 25496916; PubMed Central PMCID: PMC4271445.
348	PEP	2014	25484186	Herce HD, Rajan M, Lättig-Tünnemann G, Fillies M, Cardoso MC. A novel cell permeable DNA replication and repair marker. Nucleus. 2014;5(6):590-600. doi: 10.4161/nucl.36290. Epub 2014 Oct 31. PubMed PMID: 25484186; PubMed Central PMCID: PMC4615156.
349	101	2014	25483098	Bruno AP, De Simone FI, Iorio V, De Marco M, Khalili K, Sariyer IK, Capunzo M, Nori SL, Rosati A. HIV-1 Tat protein induces glial cell autophagy through enhancement of BAG3 protein levels. Cell Cycle. 2014;13(23):3640-4. doi: 10.4161/15384101.2014.952959. PubMed PMID: 25483098; PubMed Central PMCID: PMC4614156.
350	86	2015	25472883	Dhamija N, Choudhary D, Ladha JS, Pillai B, Mitra D. Tat predominantly associates with host promoter elements in HIV-1-infected T-cells - regulatory basis of transcriptional repression of c-Rel. FEBS J. 2015 Feb;282(3):595-610. doi: 10.1111/febs.13168. Epub 2014 Dec 22. PubMed PMID: 25472883.
351	86	2014	25471526	Bahraoui E, Briant L, Chazal N. E5564 inhibits immunosuppressive cytokine IL-10 induction promoted by HIV-1 Tat protein. Virol J. 2014 Dec 4;11:214. doi: 10.1186/s12985-014-0214-z. PubMed PMID: 25471526; PubMed Central PMCID: PMC4267154.
352	LNS	2015	25463605	Das B, Dobrowolski C, Shahir AM, Feng Z, Yu X, Sha J, Bissada NF, Weinberg A, Karn J, Ye F. Short chain fatty acids potently induce latent HIV-1 in T-cells by activating P-TEFb and multiple histone modifications. Virology. 2015 Jan 1;474:65-81. doi: 10.1016/j.virol.2014.10.033. Epub 2014 Nov 14. PubMed PMID: 25463605; PubMed Central PMCID: PMC4259832.
353	PEP	2014	25454870	Herasimtschuk A, Downey J, Nelson M, Moyle G, Mandalia S, Sikut R, Adojaan M, Stanescu I, Gotch F, Imami N. Therapeutic immunisation plus cytokine and hormone therapy improves CD4 T-cell counts, restores anti-HIV-1 responses and reduces immune activation in treated chronic HIV-1 infection. Vaccine. 2014 Dec 5;32(51):7005-7013. doi: 10.1016/j.vaccine.2014.09.072. Epub 2014 Oct 22. PubMed PMID: 254…
354	NTU	2015	25444812	Miller E, Spadaccia M, Sabado R, Chertova E, Bess J, Trubey CM, Holman RM, Salazar A, Lifson J, Bhardwaj N. Autologous aldrithiol-2-inactivated HIV-1 combined with polyinosinic-polycytidylic acid-poly-L-lysine carboxymethylcellulose as a vaccine platform for therapeutic dendritic cell immunotherapy. Vaccine. 2015 Jan 3;33(2):388-95. doi: 10.1016/j.vaccine.2014.10.054. Epub 2014 Nov 15. PubMed PMI…
355	86	2014	25429350	Ray PE, Al-Attar A, Liu XH, Das JR, Tassi E, Wellstein A. Expression of a Secreted Fibroblast Growth Factor Binding Protein-1 (FGFBP1) in Angioproliferative Kaposi Sarcoma. J AIDS Clin Res. 2014 Jun;5(6). pii: 309. PubMed PMID: 25429350; PubMed Central PMCID: PMC4241576.
356	86	2014	25416801	Paz S, Krainer AR, Caputi M. HIV-1 transcription is regulated by splicing factor SRSF1. Nucleic Acids Res. 2014 Dec 16;42(22):13812-23. PubMed PMID: 25416801; PubMed Central PMCID: PMC4267630.
357	86	2014	25416164	Kang W, Marasco WA, Tong HI, Byron MM, Wu C, Shi Y, Sun S, Sun Y, Lu Y. Anti-tat Hutat2:Fc mediated protection against tat-induced neurotoxicity and HIV-1 replication in human monocyte-derived macrophages. J Neuroinflammation. 2014 Nov 22;11:195. doi: 10.1186/s12974-014-0195-2. PubMed PMID: 25416164; PubMed Central PMCID: PMC4256057.
358	LNS	2014	25397470	Chew N, Tan E, Li L, Lim R. HIV-1 tat and rev upregulates osteoclast bone resorption. J Int AIDS Soc. 2014 Nov 2;17(4 Suppl 3):19724. doi: 10.7448/IAS.17.4.19724. eCollection 2014. PubMed PMID: 25397470; PubMed Central PMCID: PMC4225338.
359	NTU	2015	25381805	Audu R, Onwuamah C, Salu O, Okwuraiwe A, Ou CY, Bolu O, Bond KB, Diallo K, Lu L, Jelpe T, Okoye M, Ngige E, Vertefeuille J. Development and implementation challenges of a quality assured HIV infant diagnosis program in Nigeria using dried blood spots and DNA polymerase chain reaction. AIDS Res Hum Retroviruses. 2015 Apr;31(4):433-8. doi: 10.1089/AID.2014.0159. Epub 2014 Dec 17. PubMed PMID: 25381…
360	72	2014	25366660	Paul RH, Joska JA, Woods C, Seedat S, Engelbrecht S, Hoare J, Heaps J, Valcour V, Ances B, Baker LM, Salminen LE, Stein DJ. Impact of the HIV Tat C30C31S dicysteine substitution on neuropsychological function in patients with clade C disease. J Neurovirol. 2014 Dec;20(6):627-35. doi: 10.1007/s13365-014-0293-z. Epub 2014 Nov 1. PubMed PMID: 25366660; PubMed Central PMCID: PMC4268069.
361	PEP	2015	25359904	Matsuzaki-Horibuchi S, Yasuda T, Sakaguchi N, Yamaguchi Y, Akashi M. Cell-permeable intrinsic cellular inhibitors of apoptosis protect and rescue intestinal epithelial cells from radiation-induced cell death. J Radiat Res. 2015 Jan;56(1):100-13. doi: 10.1093/jrr/rru094. Epub 2014 Oct 30. PubMed PMID: 25359904; PubMed Central PMCID: PMC4572601.
362	86	2014	25356594	Titti F, Maggiorella MT, Ferrantelli F, Sernicola L, Bellino S, Collacchi B, Fanales Belasio E, Moretti S, Pavone Cossut MR, Belli R, Olivieri E, Farcomeni S, Compagnoni D, Michelini Z, Sabbatucci M, Sparnacci K, Tondelli L, Laus M, Cafaro A, Caputo A, Ensoli B. Biocompatible anionic polymeric microspheres as priming delivery system for effetive HIV/AIDS Tat-based vaccines. PLoS One. 2014 Oct 30;…
363	86	2015	25339774	Sagnier S, Daussy CF, Borel S, Robert-Hebmann V, Faure M, Blanchet FP, Beaumelle B, Biard-Piechaczyk M, Espert L. Autophagy restricts HIV-1 infection by selectively degrading Tat in CD4+ T lymphocytes. J Virol. 2015 Jan;89(1):615-25. doi: 10.1128/JVI.02174-14. Epub 2014 Oct 22. PubMed PMID: 25339774; PubMed Central PMCID: PMC4301118.
364	86	2014	25339738	Ngwainmbi J, De DD, Smith TH, El-Hage N, Fitting S, Kang M, Dewey WL, Hauser KF, Akbarali HI. Effects of HIV-1 Tat on enteric neuropathogenesis. J Neurosci. 2014 Oct 22;34(43):14243-51. doi: 10.1523/JNEUROSCI.2283-14.2014. PubMed PMID: 25339738; PubMed Central PMCID: PMC4205550.
365	LNS	2014	25333710	McLaughlin D, Faller E, Sugden S, MacPherson P. Expression of the IL-7 receptor alpha-chain is down regulated on the surface of CD4 T-cells by the HIV-1 Tat protein. PLoS One. 2014 Oct 21;9(10):e111193. doi: 10.1371/journal.pone.0111193. eCollection 2014. PubMed PMID: 25333710; PubMed Central PMCID: PMC4205093.
366	LNS	2014	25332688	Zhang SM, Zhang H, Yang TY, Ying TY, Yang PX, Liu XD, Tang SJ, Zhou PK. Interaction between HIV-1 Tat and DNA-PKcs modulates HIV transcription and class switch recombination. Int J Biol Sci. 2014 Oct 9;10(10):1138-49. doi: 10.7150/ijbs.10366. eCollection 2014. PubMed PMID: 25332688; PubMed Central PMCID: PMC4202030.
367	72, 86, 101	2014	25328666	Zhang L, Qin J, Li Y, Wang J, He Q, Zhou J, Liu M, Li D. Modulation of the stability and activities of HIV-1 Tat by its ubiquitination and carboxyl-terminal region. Cell Biosci. 2014 Oct 7;4(1):61. doi: 10.1186/2045-3701-4-61. eCollection 2014. PubMed PMID: 25328666; PubMed Central PMCID: PMC4201738.
368	86	2014	25323821	Wan Z, Chen X. Triptolide inhibits human immunodeficiency virus type 1 replication by promoting proteasomal degradation of Tat protein. Retrovirology. 2014 Oct 17;11:88. doi: 10.1186/s12977-014-0088-6. PubMed PMID: 25323821; PubMed Central PMCID: PMC4205289.
369	86	2014	25319827	Chen Y, Zhang L, Estarás C, Choi SH, Moreno L Jr, Karn J, Moresco JJ, Yates JR 3rd, Jones KA. A gene-specific role for the Ssu72 RNAPII CTD phosphatase in HIV-1 Tat transactivation. Genes Dev. 2014 Oct 15;28(20):2261-75. doi: 10.1101/gad.250449.114. PubMed PMID: 25319827; PubMed Central PMCID: PMC4201287.
370	LNS	2015	25315210	Musinova YR, Kananykhina EY, Potashnikova DM, Lisitsyna OM, Sheval EV. A charge-dependent mechanism is responsible for the dynamic accumulation of proteins inside nucleoli. Biochim Biophys Acta. 2015 Jan;1853(1):101-10. doi: 10.1016/j.bbamcr.2014.10.007. Epub 2014 Oct 12. PubMed PMID: 25315210.
371	NTU	2014	25313638	Musiani F, Rossetti G, Capece L, Gerger TM, Micheletti C, Varani G, Carloni P. Molecular dynamics simulations identify time scale of conformational changes responsible for conformational selection in molecular recognition of HIV-1 transactivation responsive RNA. J Am Chem Soc. 2014 Nov 5;136(44):15631-7. doi: 10.1021/ja507812v. Epub 2014 Oct 27. PubMed PMID: 25313638; PubMed Central PMCID: PMC552…
372	86	2014	25285887	Moran LM, Fitting S, Booze RM, Webb KM, Mactutus CF. Neonatal intrahippocampal HIV-1 protein Tat(1-86) injection: neurobehavioral alterations in the absence of increased inflammatory cytokine activation. Int J Dev Neurosci. 2014 Nov;38:195-203. doi: 10.1016/j.ijdevneu.2014.09.004. Epub 2014 Oct 5. PubMed PMID: 25285887; PubMed Central PMCID: PMC4268159.
373	LNS	2015	25272052	Tewari M, Monika, Varghse RK, Menon M, Seth P. Astrocytes mediate HIV-1 Tat-induced neuronal damage via ligand-gated ion channel P2X7R. J Neurochem. 2015 Feb;132(4):464-76. PubMed PMID: 25272052.
374	NTU	2014	25265194	Aiamkitsumrit B, Dampier W, Martin-Garcia J, Nonnemacher MR, Pirrone V, Ivanova T, Zhong W, Kilareski E, Aldigun H, Frantz B, Rimbey M, Wojno A, Passic S, Williams JW, Shah S, Blakey B, Parikh N, Jacobson JM, Moldover B, Wigdahl B. Defining differential genetic signatures in CXCR4- and the CCR5-utilizing HIV-1 co-linear sequences. PLoS One. 2014 Sep 29;9(9):e107389. doi: 10.1371/journal.pone.0107…
375	PEP, 101	2014	25245933	Lakhashe SK, Byrareddy SN, Zhou M, Bachler BC, Hemashettar G, Hu SL, Villinger F, Else JG, Stock S, Lee SJ, Vargas-Inchaustegui DA, Cofano EB, Robert-Guroff M, Johnson WE, Polonis VR, Forthal DN, Loret EP, Rasmussen RA, Ruprecht RM. Multimodality vaccination against clade C SHIV: partial protection against mucosal challenges with a heterologous tier 2 virus. Vaccine. 2014 Nov 12;32(48):6527-36. d…
376	PEP, 86	2014	25232120	Fitting S, Knapp PE, Zou S, Marks WD, Bowers MS, Akbarali HI, Hauser KF. Interactive HIV-1 Tat and morphine-induced synaptodendritic injury is triggered through focal disruptions in Na⁺ influx, mitochondrial instability, and Ca²⁺ overload. J Neurosci. 2014 Sep 17;34(38):12850-64. doi: 10.1523/JNEUROSCI.5351-13.2014. PubMed PMID: 25232120; PubMed Central PMCID: PMC4166164.
377	86	2013	25228267	Nutan, Modi M, Dezzutti CS, Kulshreshtha S, Rawat AK, Srivastava SK, Malhotra S, Verma A, Ranga U, Gupta SK. Extracts from Acacia catechu suppress HIV-1 replication by inhibiting the activities of the viral protease and Tat. Virol J. 2013 Oct 18;10:309. doi: 10.1186/1743-422X-10-309. PubMed PMID: 25228267; PubMed Central PMCID: PMC3819669.
378	NTU	2014	25218345	Wang J, Dong L, Xu L, Chu ES, Chen Y, Shen J, Li X, Wong CC, Sung JJ, Yu J. B cell CLL/lymphoma 6 member B inhibits hepatocellular carcinoma metastases in vitro and in mice. Cancer Lett. 2014 Dec 28;355(2):192-200. doi: 10.1016/j.canlet.2014.08.025. Epub 2014 Sep 11. PubMed PMID: 25218345.
379	101	2014	25188302	Chauhan A. Unperturbed posttranscriptional regulatory Rev protein function and HIV-1 replication in astrocytes. PLoS One. 2014 Sep 4;9(9):e106910. doi: 10.1371/journal.pone.0106910. eCollection 2014. PubMed PMID: 25188302; PubMed Central PMCID: PMC4154834.
380	101	2014	25188269	Rao VR, Neogi U, Eugenin E, Prasad VR. The gp120 protein is a second determinant of decreased neurovirulence of Indian HIV-1C isolates compared to southern African HIV-1C isolates. PLoS One. 2014 Sep 4;9(9):e107074. doi: 10.1371/journal.pone.0107074. eCollection 2014. PubMed PMID: 25188269; PubMed Central PMCID: PMC4154767.
381	PEP	2014	25170611	Bird GA, Polsky A, Estes P, Hanlon T, Hamilton H, Morton JJ, Gutman J, Jimeno A, Turner BC, Refaeli Y. Expansion of human and murine hematopoietic stem and progenitor cells ex vivo without genetic modification using MYC and Bcl-2 fusion proteins. PLoS One. 2014 Aug 29;9(8):e105525. doi: 10.1371/journal.pone.0105525. eCollection 2014. PubMed PMID: 25170611; PubMed Central PMCID: PMC4149411.
382	101	2014	25164676	Niu F, Yao H, Zhang W, Sutliff RL, Buch S. Tat 101-mediated enhancement of brain pericyte migration involves platelet-derived growth factor subunit B homodimer: implications for human immunodeficiency virus-associated neurocognitive disorders. J Neurosci. 2014 Aug 27;34(35):11812-25. doi: 10.1523/JNEUROSCI.1139-14.2014. PubMed PMID: 25164676; PubMed Central PMCID: PMC4145180.
383	86	2015	25156524	Krogh KA, Lyddon E, Thayer SA. HIV-1 Tat activates a RhoA signaling pathway to reduce NMDA-evoked calcium responses in hippocampal neurons via an actin-dependent mechanism. J Neurochem. 2015 Feb;132(3):354-66. doi: 10.1111/jnc.12936. Epub 2014 Sep 18. PubMed PMID: 25156524; PubMed Central PMCID: PMC4304915.
384	86	2014	25155598	Kumari N, Iordanskiy S, Kovalskyy D, Breuer D, Niu X, Lin X, Xu M, Gavrilenko K, Kashanchi F, Dhawan S, Nekhai S. Phenyl-1-Pyridin-2yl-ethanone-based iron chelators increase IκB-α expression, modulate CDK2 and CDK9 activities, and inhibit HIV-1 transcription. Antimicrob Agents Chemother. 2014 Nov;58(11):6558-71. doi: 10.1128/AAC.02918-14. Epub 2014 Aug 25. PubMed PMID: 25155598; PubMed Central PM…
385	PEP	2014	25148702	Akabori K, Huang K, Treece BW, Jablin MS, Maranville B, Woll A, Nagle JF, Garcia AE, Tristram-Nagle S. HIV-1 Tat membrane interactions probed using X-ray and neutron scattering, CD spectroscopy and MD simulations. Biochim Biophys Acta. 2014 Dec;1838(12):3078-87. doi: 10.1016/j.bbamem.2014.08.014. Epub 2014 Aug 19. PubMed PMID: 25148702; PubMed Central PMCID: PMC4610132.
386	101	2014	25146963	Jadhav VS, Krause KH, Singh SK. HIV-1 Tat C modulates NOX2 and NOX4 expressions through miR-17 in a human microglial cell line. J Neurochem. 2014 Dec;131(6):803-15. doi: 10.1111/jnc.12933. Epub 2014 Sep 18. PubMed PMID: 25146963.
387	PEP	2014	25136100	Rao Y, Kwok SJ, Lombardi J, Turro NJ, Eisenthal KB. Label-free probe of HIV-1 TAT peptide binding to mimetic membranes. Proc Natl Acad Sci U S A. 2014 Sep 2;111(35):12684-8. doi: 10.1073/pnas.1411817111. Epub 2014 Aug 18. PubMed PMID: 25136100; PubMed Central PMCID: PMC4156756.
388	86	2014	25116364	Kim HY, Choi BS, Kim SS, Roh TY, Park J, Yoon CH. NUCKS1, a novel Tat coactivator, plays a crucial role in HIV-1 replication by increasing Tat-mediated viral transcription on the HIV-1 LTR promoter. Retrovirology. 2014 Aug 13;11:67. doi: 10.1186/s12977-014-0067-y. PubMed PMID: 25116364; PubMed Central PMCID: PMC4181878.
389	86	2014	25100719	Ruiz A, Pauls E, Badia R, Riveira-Muñoz E, Clotet B, Ballana E, Esté JA. Characterization of the influence of mediator complex in HIV-1 transcription. J Biol Chem. 2014 Oct 3;289(40):27665-76. doi: 10.1074/jbc.M114.570341. Epub 2014 Aug 6. PubMed PMID: 25100719; PubMed Central PMCID: PMC4183804.
390	86	2014	27076899	Kellish PC, Kumar S, Mack TS, Spano MN, Hennig M, Arya DP. Multivalent Amino Sugars to Recognize Different TAR RNA Conformations. Medchemcomm. 2014 Aug 1;5(8):1235-1246. Epub 2014 May 30. PubMed PMID: 27076899; PubMed Central PMCID: PMC4828046.
391	LNS	2014	25073485	Ammosova T, Platonov M, Ivanov A, Kont YS, Kumari N, Kehn-Hall K, Jerebtsova M, Kulkarni AA, Uren A, Kovalskyy D, Nekhai S. 1E7-03, a low MW compound targeting host protein phosphatase-1, inhibits HIV-1 transcription. Br J Pharmacol. 2014 Nov;171(22):5059-75. doi: 10.1111/bph.12863. PubMed PMID: 25073485; PubMed Central PMCID: PMC4253456.
392	86	2014	25072692	Scarborough RJ, Lévesque MV, Boudrias-Dalle E, Chute IC, Daniels SM, Ouellette RJ, Perreault JP, Gatignol A. A Conserved Target Site in HIV-1 Gag RNA is Accessible to Inhibition by Both an HDV Ribozyme and a Short Hairpin RNA. Mol Ther Nucleic Acids. 2014 Jul 29;3:e178. doi: 10.1038/mtna.2014.31. PubMed PMID: 25072692; PubMed Central PMCID: PMC4121520.
393	LNS	2014	25054885	Liégeois F, Schmidt F, Boué V, Butel C, Mouacha F, Ngari P, Ondo BM, Leroy E, Heeney JL, Delaporte E, Peeters M, Rouet F. Full-length genome analyses of two new simian immunodeficiency virus (SIV) strains from mustached monkeys (C. Cephus) in Gabon illustrate a complex evolutionary history among the SIVmus/mon/gsn lineage. Viruses. 2014 Jul 22;6(7):2880-98. doi: 10.3390/v6072880. PubMed PMID: 250…
394	PEP	2014	25050170	Leonidova A, Pierroz V, Adams LA, Barlow N, Ferrari S, Graham B, Gasser G. Enhanced Cytotoxicity through Conjugation of a ""Clickable"" Luminescent Re(I) Complex to a Cell-Penetrating Lipopeptide. ACS Med Chem Lett. 2014 May 15;5(7):809-14. doi: 10.1021/ml500158w. eCollection 2014 Jul 10. PubMed PMID: 25050170; PubMed Central PMCID: PMC4094263.
395	NTU	2014	25034490	Gürtler LG. Effect of antiretroviral HIV therapy on hepatitis B virus replication and pathogenicity. Intervirology. 2014;57(3-4):212-7. doi: 10.1159/000360942. Epub 2014 Jul 15. PubMed PMID: 25034490.
396	86	2014	25033084	Sicurella M, Nicoli F, Gallerani E, Volpi I, Berto E, Finessi V, Destro F, Manservigi R, Cafaro A, Ensoli B, Caputo A, Gavioli R, Marconi PC. An attenuated herpes simplex virus type 1 (HSV1) encoding the HIV-1 Tat protein protects mice from a deadly mucosal HSV1 challenge. PLoS One. 2014 Jul 17;9(7):e100844. doi: 10.1371/journal.pone.0100844. eCollection 2014. PubMed PMID: 25033084; PubMed Centra…
397	LNS	2014	25028937	Song H, Hora B, Bhattacharya T, Goonetilleke N, Liu MK, Wiehe K, Li H, Iyer SS, McMichael AJ, Perelson AS, Gao F. Reversion and T cell escape mutations compensate the fitness loss of a CD8+ T cell escape mutant in their cognate transmitted/founder virus. PLoS One. 2014 Jul 16;9(7):e102734. doi: 10.1371/journal.pone.0102734. eCollection 2014. PubMed PMID: 25028937; PubMed Central PMCID: PMC4100905.
398	PEP	2014	24991756	Fasoli A, Salomone F, Benedusi M, Boccardi C, Rispoli G, Beltram F, Cardarelli F. Mechanistic insight into CM18-Tat11 peptide membrane-perturbing action by whole-cell patch-clamp recording. Molecules. 2014 Jul 2;19(7):9228-39. doi: 10.3390/molecules19079228. PubMed PMID: 24991756; PubMed Central PMCID: PMC6271366.
399	101	2014	24990269	Bouwman RD, Palser A, Parry CM, Coulter E, Rasaiyaah J, Kellam P, Jenner RG. Human immunodeficiency virus Tat associates with a specific set of cellular RNAs. Retrovirology. 2014 Jul 3;11:53. doi: 10.1186/1742-4690-11-53. PubMed PMID: 24990269; PubMed Central PMCID: PMC4086691.
400	101	2014	24985203	Verstraete N, Kuzmina A, Diribarne G, Nguyen VT, Kobbi L, Ludanyi M, Taube R, Bensaude O. A Cyclin T1 point mutation that abolishes positive transcription elongation factor (P-TEFb) binding to Hexim1 and HIV tat. Retrovirology. 2014 Jul 1;11:50. doi: 10.1186/1742-4690-11-50. PubMed PMID: 24985203; PubMed Central PMCID: PMC4227133.
401	LNS	2014	24965120	Mishra R, Singh SK. HIV-1 Tat C phosphorylates VE-cadherin complex and increases human brain microvascular endothelial cell permeability. BMC Neurosci. 2014 Jun 26;15:80. doi: 10.1186/1471-2202-15-80. PubMed PMID: 24965120; PubMed Central PMCID: PMC4230799.
402	LNS	2014	24961156	Bellino S, Tripiciano A, Picconi O, Francavilla V, Longo O, Sgadari C, Paniccia G, Arancio A, Angarano G, Ladisa N, Lazzarin A, Tambussi G, Nozza S, Torti C, Focà E, Palamara G, Latini A, Sighinolfi L, Mazzotta F, Di Pietro M, Di Perri G, Bonora S, Mercurio VS, Mussini C, Gori A, Galli M, Monini P, Cafaro A, Ensoli F, Ensoli B. The presence of anti-Tat antibodies in HIV-infected individuals is as…
403	LNS	2014	24957778	Chikere K, Webb NE, Chou T, Borm K, Sterjovski J, Gorry PR, Lee B. Distinct HIV-1 entry phenotypes are associated with transmission, subtype specificity, and resistance to broadly neutralizing antibodies. Retrovirology. 2014 Jun 23;11:48. doi: 10.1186/1742-4690-11-48. PubMed PMID: 24957778; PubMed Central PMCID: PMC4230403.
404	LNS	2014	24954875	Grifoni A, Montesano C, Palma P, Giovanetti M, Castelli-Gattinara G, Ciccozzi M, Mattei M, Mancino G, Salerno A, Colizzi V, Amicosante M. Role of individual's T-cell immunome in controlling HIV-1 progression. Immunology. 2014 Dec;143(4):631-9. doi: 10.1111/imm.12344. Erratum in: Immunology. 2015 Apr;144(4):717. Giovannetti, Marta [corrected to Giovanetti, Marta]. PubMed PMID: 24954875; PubMed Cen…
405	101	2014	24949623	Masvekar RR, El-Hage N, Hauser KF, Knapp PE. Morphine enhances HIV-1SF162-mediated neuron death and delays recovery of injured neurites. PLoS One. 2014 Jun 20;9(6):e100196. doi: 10.1371/journal.pone.0100196. eCollection 2014. PubMed PMID: 24949623; PubMed Central PMCID: PMC4064991.
406	PEP, 86	2014	24949479	Garulli B, Di Mario G, Stillitano MG, Compagnoni D, Titti F, Cafaro A, Ensoli B, Kawaoka Y, Castrucci MR. Induction of antibodies and T cell responses by a recombinant influenza virus carrying an HIV-1 TatΔ51-59 protein in mice. Biomed Res Int. 2014;2014:904038. doi: 10.1155/2014/904038. Epub 2014 May 14. PubMed PMID: 24949479; PubMed Central PMCID: PMC4053076.
407	86	2014	24911386	Liu Z, Shi Z, Liu J, Wang Y. HIV transactivator of transcription enhances methamphetamine-induced Parkinson's-like behavior in the rats. Neuroreport. 2014 Aug 6;25(11):860-864. doi: 10.1097/WNR.0000000000000199. PubMed PMID: 24911386; PubMed Central PMCID: PMC4236185.
408	101	2014	24889222	Laurent F, Tchénio T, Buckle M, Hazan U, Bury-Moné S. XMRV low level of expression in human cells delays superinfection interference and allows proviral copies to accumulate. Virology. 2014 May;456-457:28-38. doi: 10.1016/j.virol.2014.03.006. Epub 2014 Mar 28. PubMed PMID: 24889222.
409	101	2014	24886930	Sargeant DP, Deverasetty S, Strong CL, Alaniz IJ, Bartlett A, Brandon NR, Brooks SB, Brown FA, Bufi F, Chakarova M, David RP, Dobritch KM, Guerra HP, Hedden MW, Kumra R, Levitt KS, Mathew KR, Matti R, Maza DQ, Mistry S, Novakovic N, Pomerantz A, Portillo J, Rafalski TF, Rathnayake VR, Rezapour N, Songao S, Tuggle SL, Yousif S, Dorsky DI, Schiller MR. The HIVToolbox 2 web system integrates sequenc…
410	86	2014	24886416	Shah S, Alexaki A, Pirrone V, Dahiya S, Nonnemacher MR, Wigdahl B. Functional properties of the HIV-1 long terminal repeat containing single-nucleotide polymorphisms in Sp site III and CCAAT/enhancer binding protein site I. Virol J. 2014 May 16;11:92. doi: 10.1186/1743-422X-11-92. PubMed PMID: 24886416; PubMed Central PMCID: PMC4047001.
411	PEP	2014	24878961	Zhuang X, Stahl SJ, Watts NR, DiMattia MA, Steven AC, Wingfield PT. A cell-penetrating antibody fragment against HIV-1 Rev has high antiviral activity: characterization of the paratope. J Biol Chem. 2014 Jul 18;289(29):20222-33. doi: 10.1074/jbc.M114.581090. Epub 2014 May 30. PubMed PMID: 24878961; PubMed Central PMCID: PMC4106338.
412	86	2014	24872592	Gonzalez-Hernandez MJ, Cavalcoli JD, Sartor MA, Contreras-Galindo R, Meng F, Dai M, Dube D, Saha AK, Gitlin SD, Omenn GS, Kaplan MH, Markovitz DM. Regulation of the human endogenous retrovirus K (HML-2) transcriptome by the HIV-1 Tat protein. J Virol. 2014 Aug;88(16):8924-35. doi: 10.1128/JVI.00556-14. Epub 2014 May 28. PubMed PMID: 24872592; PubMed Central PMCID: PMC4136263.
413	72	2014	24862326	Duan M, Yao H, Cai Y, Liao K, Seth P, Buch S. HIV-1 Tat disrupts CX3CL1-CX3CR1 axis in microglia via the NF-κBYY1 pathway. Curr HIV Res. 2014;12(3):189-200. PubMed PMID: 24862326; PubMed Central PMCID: PMC5003019.
414	86	2014	24860166	Itzen F, Greifenberg AK, Bösken CA, Geyer M. Brd4 activates P-TEFb for RNA polymerase II CTD phosphorylation. Nucleic Acids Res. 2014 Jul;42(12):7577-90. doi: 10.1093/nar/gku449. Epub 2014 May 23. PubMed PMID: 24860166; PubMed Central PMCID: PMC4081074.
415	86	2014	24859335	Nowarski R, Prabhu P, Kenig E, Smith Y, Britan-Rosich E, Kotler M. APOBEC3G inhibits HIV-1 RNA elongation by inactivating the viral trans-activation response element. J Mol Biol. 2014 Jul 29;426(15):2840-53. doi: 10.1016/j.jmb.2014.05.012. Epub 2014 May 21. PubMed PMID: 24859335; PubMed Central PMCID: PMC4134778.
416	86, 101	2014	24855648	Vartak-Sharma N, Gelman BB, Joshi C, Borgamann K, Ghorpade A. Astrocyte elevated gene-1 is a novel modulator of HIV-1-associated neuroinflammation via regulation of nuclear factor-κB signaling and excitatory amino acid transporter-2 repression. J Biol Chem. 2014 Jul 11;289(28):19599-612. doi: 10.1074/jbc.M114.567644. Epub 2014 May 22. PubMed PMID: 24855648; PubMed Central PMCID: PMC4094071.
417	LNS	2014	24845011	Moscatiello R, Sello S, Novero M, Negro A, Bonfante P, Navazio L. The intracellular delivery of TAT-aequorin reveals calcium-mediated sensing of environmental and symbiotic signals by the arbuscular mycorrhizal fungus Gigaspora margarita. New Phytol. 2014 Aug;203(3):1012-20. doi: 10.1111/nph.12849. Epub 2014 May 21. PubMed PMID: 24845011.
418	PEP	2014	24843025	Schulze-Gahmen U, Lu H, Zhou Q, Alber T. AFF4 binding to Tat-P-TEFb indirectly stimulates TAR recognition of super elongation complexes at the HIV promoter. Elife. 2014 Apr 24;3:e02375. doi: 10.7554/eLife.02375. PubMed PMID: 24843025; PubMed Central PMCID: PMC4013717.
419	PEP	2014	24829350	Jost S, Tomezsko PJ, Rands K, Toth I, Lichterfeld M, Gandhi RT, Altfeld M. CD4+ T-cell help enhances NK cell function following therapeutic HIV-1 vaccination. J Virol. 2014 Aug;88(15):8349-54. doi: 10.1128/JVI.00924-14. Epub 2014 May 14. PubMed PMID: 24829350; PubMed Central PMCID: PMC4135926.
420	PEP, 86	2014	24820173	Jaworski E, Saifuddin M, Sampey G, Shafagati N, Van Duyne R, Iordanskiy S, Kehn-Hall K, Liotta L, Petricoin E 3rd, Young M, Lepene B, Kashanchi F. The use of Nanotrap particles technology in capturing HIV-1 virions and viral proteins from infected cells. PLoS One. 2014 May 12;9(5):e96778. doi: 10.1371/journal.pone.0096778. eCollection 2014. PubMed PMID: 24820173; PubMed Central PMCID: PMC4018389.
421	86	2014	24813724	Silva JN, Polesskaya O, Wei HS, Rasheed IY, Chamberlain JM, Nishimura C, Feng C, Dewhurst S. Chronic central nervous system expression of HIV-1 Tat leads to accelerated rarefaction of neocortical capillaries and loss of red blood cell velocity heterogeneity. Microcirculation. 2014 Oct;21(7):664-76. doi: 10.1111/micc.12145. PubMed PMID: 24813724; PubMed Central PMCID: PMC4194156.
422	101	2014	24789928	Yoo SY, Le TK, Jeong JJ, Kim DH. Poligapolide, a PI3K/Akt inhibitor in immunodeficiency virus type 1 TAT-transduced CHME5 cells, isolated from the rhizome of Polygala tenuifolia. Chem Pharm Bull (Tokyo). 2014;62(5):467-71. PubMed PMID: 24789928.
423	86	2014	24766462	Klug YA, Ashkenazi A, Viard M, Porat Z, Blumenthal R, Shai Y. Early and late HIV-1 membrane fusion events are impaired by sphinganine lipidated peptides that target the fusion site. Biochem J. 2014 Jul 15;461(2):213-22. doi: 10.1042/BJ20140189. PubMed PMID: 24766462; PubMed Central PMCID: PMC4072049.
424	86	2014	24742657	Raborn ES, Jamerson M, Marciano-Cabral F, Cabral GA. Cannabinoid inhibits HIV-1 Tat-stimulated adhesion of human monocyte-like cells to extracellular matrix proteins. Life Sci. 2014 May 28;104(1-2):15-23. doi: 10.1016/j.lfs.2014.04.008. Epub 2014 Apr 15. PubMed PMID: 24742657; PubMed Central PMCID: PMC4089388.
425	PEP, 72, 86, 101	2014	24742347	Kukkonen S, Martinez-Viedma Mdel P, Kim N, Manrique M, Aldovini A. HIV-1 Tat second exon limits the extent of Tat-mediated modulation of interferon-stimulated genes in antigen presenting cells. Retrovirology. 2014 Apr 17;11:30. doi: 10.1186/1742-4690-11-30. PubMed PMID: 24742347; PubMed Central PMCID: PMC4036831.
426	86	2014	24739951	Che X, He F, Deng Y, Xu S, Fan X, Gu P, Wang Z. HIV-1 Tat-mediated apoptosis in human blood-retinal barrier-associated cells. PLoS One. 2014 Apr 16;9(4):e95420. doi: 10.1371/journal.pone.0095420. eCollection 2014. PubMed PMID: 24739951; PubMed Central PMCID: PMC3989329.
427	86	2014	24732776	El-Hage N, Rodriguez M, Podhaizer EM, Zou S, Dever SM, Snider SE, Knapp PE, Beardsley PM, Hauser KF. Ibudilast (AV411), and its AV1013 analog, reduce HIV-1 replication and neuronal death induced by HIV-1 and morphine. AIDS. 2014 Jun 19;28(10):1409-19. doi: 10.1097/QAD.0000000000000291. PubMed PMID: 24732776; PubMed Central PMCID: PMC4300098.
428	PEP	2014	24727379	Gu J, Babayeva ND, Suwa Y, Baranovskiy AG, Price DH, Tahirov TH. Crystal structure of HIV-1 Tat complexed with human P-TEFb and AFF4. Cell Cycle. 2014;13(11):1788-97. doi: 10.4161/cc.28756. Epub 2014 Apr 11. PubMed PMID: 24727379; PubMed Central PMCID: PMC4111725.
429	86	2014	24726788	Paris JJ, Fenwick J, McLaughlin JP. Progesterone protects normative anxiety-like responding among ovariectomized female mice that conditionally express the HIV-1 regulatory protein, Tat, in the CNS. Horm Behav. 2014 May;65(5):445-53. doi: 10.1016/j.yhbeh.2014.04.001. Epub 2014 Apr 12. PubMed PMID: 24726788; PubMed Central PMCID: PMC4067900.
430	LNS	2014	24719417	Karijolich J, Zhao Y, Peterson B, Zhou Q, Glaunsinger B. Kaposi's sarcoma-associated herpesvirus ORF45 mediates transcriptional activation of the HIV-1 long terminal repeat via RSK2. J Virol. 2014 Jun;88(12):7024-35. doi: 10.1128/JVI.00931-14. Epub 2014 Apr 9. PubMed PMID: 24719417; PubMed Central PMCID: PMC4054375.
431	86	2014	24719048	Parker IK, Roberts LM, Hansen L, Gleason RL Jr, Sutliff RL, Platt MO. Pro-atherogenic shear stress and HIV proteins synergistically upregulate cathepsin K in endothelial cells. Ann Biomed Eng. 2014 Jun;42(6):1185-94. doi: 10.1007/s10439-014-1005-9. Epub 2014 Apr 10. PubMed PMID: 24719048; PubMed Central PMCID: PMC4071232.
432	LNS	2014	24717285	Orecchini E, Doria M, Michienzi A, Giuliani E, Vassena L, Ciafrè SA, Farace MG, Galardi S. The HIV-1 Tat protein modulates CD4 expression in human T cells through the induction of miR-222. RNA Biol. 2014;11(4):334-8. doi: 10.4161/rna.28372. Epub 2014 Mar 6. PubMed PMID: 24717285; PubMed Central PMCID: PMC4075518.
433	86, 101	2014	24714696	Pan T, Wu S, He X, Luo H, Zhang Y, Fan M, Geng G, Ruiz VC, Zhang J, Mills L, Bai C, Zhang H. Necroptosis takes place in human immunodeficiency virus type-1 (HIV-1)-infected CD4+ T lymphocytes. PLoS One. 2014 Apr 8;9(4):e93944. doi: 10.1371/journal.pone.0093944. eCollection 2014. PubMed PMID: 24714696; PubMed Central PMCID: PMC3979729.
434	SIV	2014	24710023	Reece JC, Martyushev A, Petravic J, Grimm A, Gooneratne S, Amaresena T, De Rose R, Loh L, Davenport MP, Kent SJ. Measuring turnover of SIV DNA in resting CD4+ T cells using pyrosequencing: implications for the timing of HIV eradication therapies. PLoS One. 2014 Apr 7;9(4):e93330. doi: 10.1371/journal.pone.0093330. eCollection 2014. PubMed PMID: 24710023; PubMed Central PMCID: PMC3977820.
435	PEP, 86, 101	2014	24696476	Planès R, BenMohamed L, Leghmari K, Delobel P, Izopet J, Bahraoui E. HIV-1 Tat protein induces PD-L1 (B7-H1) expression on dendritic cells through tumor necrosis factor alpha- and toll-like receptor 4-mediated mechanisms. J Virol. 2014 Jun;88(12):6672-89. doi: 10.1128/JVI.00825-14. Epub 2014 Apr 2. PubMed PMID: 24696476; PubMed Central PMCID: PMC4054384.
436	86	2014	24694382	Brailoiu E, Deliu E, Sporici RA, Benamar K, Brailoiu GC. HIV-1-Tat excites cardiac parasympathetic neurons of nucleus ambiguus and triggers prolonged bradycardia in conscious rats. Am J Physiol Regul Integr Comp Physiol. 2014 Jun 1;306(11):R814-22. doi: 10.1152/ajpregu.00529.2013. Epub 2014 Apr 2. PubMed PMID: 24694382; PubMed Central PMCID: PMC4042203.
437	86	2014	24667918	Woollard SM, Bhargavan B, Yu F, Kanmogne GD. Differential effects of Tat proteins derived from HIV-1 subtypes B and recombinant CRF02_AG on human brain microvascular endothelial cells: implications for blood-brain barrier dysfunction. J Cereb Blood Flow Metab. 2014 Jun;34(6):1047-59. doi: 10.1038/jcbfm.2014.54. Epub 2014 Mar 26. PubMed PMID: 24667918; PubMed Central PMCID: PMC4050250.
438	86	2014	24666322	Krogh KA, Wydeven N, Wickman K, Thayer SA. HIV-1 protein Tat produces biphasic changes in NMDA-evoked increases in intracellular Ca2+ concentration via activation of Src kinase and nitric oxide signaling pathways. J Neurochem. 2014 Sep;130(5):642-56. doi: 10.1111/jnc.12724. Epub 2014 Apr 19. PubMed PMID: 24666322; PubMed Central PMCID: PMC4141023.
439	72	2014	24625401	Zhao L, Pu SS, Gao WH, Chi YY, Wen HL, Wang ZY, Song YY, Yu XJ. Effects of HIV-1 tat on secretion of TNF-α and IL-1β by U87 cells in AIDS patients with or without AIDS dementia complex. Biomed Environ Sci. 2014 Feb;27(2):111-7. doi: 10.3967/bes2014.024. PubMed PMID: 24625401.
440	LNS	2014	24623795	Eilebrecht S, Le Douce V, Riclet R, Targat B, Hallay H, Van Driessche B, Schwartz C, Robette G, Van Lint C, Rohr O, Benecke AG. HMGA1 recruits CTIP2-repressed P-TEFb to the HIV-1 and cellular target promoters. Nucleic Acids Res. 2014 Apr;42(8):4962-71. doi: 10.1093/nar/gku168. Epub 2014 Mar 11. PubMed PMID: 24623795; PubMed Central PMCID: PMC4005653.
441	86	2014	24607481	Mizutani T, Ishizaka A, Suzuki Y, Iba H. 7SK small nuclear ribonucleoprotein complex is recruited to the HIV-1 promoter via short viral transcripts. FEBS Lett. 2014 May 2;588(9):1630-6. doi: 10.1016/j.febslet.2014.01.067. Epub 2014 Mar 6. PubMed PMID: 24607481.
442	PEP	2014	24586748	Hong JB, Chou FJ, Ku AT, Fan HH, Lee TL, Huang YH, Yang TL, Su IC, Yu IS, Lin SW, Chien CL, Ho HN, Chen YT. A nucleolus-predominant piggyBac transposase, NP-mPB, mediates elevated transposition efficiency in mammalian cells. PLoS One. 2014 Feb 24;9(2):e89396. doi: 10.1371/journal.pone.0089396. eCollection 2014. PubMed PMID: 24586748; PubMed Central PMCID: PMC3933532.
443	86, 101	2014	24578133	Xie X, Colberg-Poley AM, Das JR, Li J, Zhang A, Tang P, Jerebtsova M, Gutkind JS, Ray PE. The basic domain of HIV-tat transactivating protein is essential for its targeting to lipid rafts and regulating fibroblast growth factor-2 signaling in podocytes isolated from children with HIV-1-associated nephropathy. J Am Soc Nephrol. 2014 Aug;25(8):1800-13. doi: 10.1681/ASN.2013070710. Epub 2014 Feb 27.…
444	86, 101	2014	24567038	Napier TC, Chen L, Kashanchi F, Hu XT. Repeated cocaine treatment enhances HIV-1 Tat-induced cortical excitability via over-activation of L-type calcium channels. J Neuroimmune Pharmacol. 2014 Jun;9(3):354-68. doi: 10.1007/s11481-014-9524-6. Epub 2014 Feb 25. PubMed PMID: 24567038; PubMed Central PMCID: PMC4019717.
445	72	2013	24563721	Tremblay MÈ, Marker DF, Puccini JM, Muly EC, Lu SM, Gelbard HA. Ultrastructure of microglia-synapse interactions in the HIV-1 Tat-injected murine central nervous system. Commun Integr Biol. 2013 Nov 1;6(6):e27670. doi: 10.4161/cib.27670. Epub 2013 Dec 31. PubMed PMID: 24563721; PubMed Central PMCID: PMC3919816.
446	NTU	2014	24551192	Patel P, Khan N, Rani M, Gupta D, Jameel S. The expression of HIV-1 Vpu in monocytes causes increased secretion of TGF-β that activates profibrogenic genes in hepatic stellate cells. PLoS One. 2014 Feb 13;9(2):e88934. doi: 10.1371/journal.pone.0088934. eCollection 2014. PubMed PMID: 24551192; PubMed Central PMCID: PMC3923874.
447	NTU	2015	24528253	Ramakrishnan R, Liu H, Rice AP. Short communication: SAHA (vorinostat) induces CDK9 Thr-186 (T-loop) phosphorylation in resting CD4+ T cells: implications for reactivation of latent HIV. AIDS Res Hum Retroviruses. 2015 Jan;31(1):137-41. doi: 10.1089/AID.2013.0288. PubMed PMID: 24528253; PubMed Central PMCID: PMC4287136.
448	LNS	2014	24521207	Li X, Feng Y, Yang Y, Chen Y, Guo Q, Sun L, Zang X, Xing H, Shao Y. Near full-length genome sequence of a novel HIV-1 recombinant form (CRF01_AE/B) detected among men who have sex with men in Jilin Province, China. AIDS Res Hum Retroviruses. 2014 Jul;30(7):701-5. doi: 10.1089/AID.2014.0008. Epub 2014 Mar 6. PubMed PMID: 24521207; PubMed Central PMCID: PMC4076975.
449	LNS	2014	24505331	Deere JD, Kauffman RC, Cannavo E, Higgins J, Villalobos A, Adamson L, Schinazi RF, Luciw PA, North TW. Analysis of multiply spliced transcripts in lymphoid tissue reservoirs of rhesus macaques infected with RT-SHIV during HAART. PLoS One. 2014 Feb 5;9(2):e87914. doi: 10.1371/journal.pone.0087914. eCollection 2014. PubMed PMID: 24505331; PubMed Central PMCID: PMC3914874.
450	LNS	2014	24505242	Tong J, Buch S, Yao H, Wu C, Tong HI, Wang Y, Lu Y. Monocytes-derived macrophages mediated stable expression of human brain-derived neurotrophic factor, a novel therapeutic strategy for neuroAIDS. PLoS One. 2014 Feb 5;9(2):e82030. doi: 10.1371/journal.pone.0082030. eCollection 2014. PubMed PMID: 24505242; PubMed Central PMCID: PMC3914783.
451	101	2013	24498468	Chin'ombe N, Lebeko M, Kgatle M. Overexpression of recombinant HIV-1 Subtype C Tat and Nef in a Salmonella vaccine vector. Pan Afr Med J. 2013 Sep 17;16:19. doi: 10.11604/pamj.2013.16.19.2759. eCollection 2013. PubMed PMID: 24498468; PubMed Central PMCID: PMC3909692.
452	LNS	2014	24489003	Witwer KW. HIV-1 Tat- and Vpr-responsive microRNAs of neuronal cells. J Biol Chem. 2014 Jan 31;289(5):3104. doi: 10.1074/jbc.L113.541755. PubMed PMID: 24489003; PubMed Central PMCID: PMC3908440.
453	86, 101	2014	24480751	Samikkannu T, Rao KV, Kanthikeel SP, Atluri VS, Agudelo M, Roy U, Nair MP. Immunoneuropathogenesis of HIV-1 clades B and C: role of redox expression and thiol modification. Free Radic Biol Med. 2014 Apr;69:136-44. doi: 10.1016/j.freeradbiomed.2013.12.025. Epub 2014 Jan 27. PubMed PMID: 24480751; PubMed Central PMCID: PMC4211896.
454	PEP	2014	24474686	Brustovetsky T, Pellman JJ, Yang XF, Khanna R, Brustovetsky N. Collapsin response mediator protein 2 (CRMP2) interacts with N-methyl-D-aspartate (NMDA) receptor and Na+/Ca2+ exchanger and regulates their functional activity. J Biol Chem. 2014 Mar 14;289(11):7470-82. doi: 10.1074/jbc.M113.518472. Epub 2014 Jan 28. PubMed PMID: 24474686; PubMed Central PMCID: PMC3953261.
455	72	2014	24465566	Ronsard L, Lata S, Singh J, Ramachandran VG, Das S, Banerjea AC. Molecular and genetic characterization of natural HIV-1 Tat Exon-1 variants from North India and their functional implications. PLoS One. 2014 Jan 23;9(1):e85452. doi: 10.1371/journal.pone.0085452. eCollection 2014. PubMed PMID: 24465566; PubMed Central PMCID: PMC3900424.
456	NTU	2014	24446345	Yang C, Ngo L, Zheng YG. Rational design of substrate-based multivalent inhibitors of the histone acetyltransferase Tip60. ChemMedChem. 2014 Mar;9(3):537-41. doi: 10.1002/cmdc.201300478. Epub 2014 Jan 20. PubMed PMID: 24446345; PubMed Central PMCID: PMC4150253.
457	PEP, 86	2014	24444350	Sholukh AM, Byrareddy SN, Shanmuganathan V, Hemashettar G, Lakhashe SK, Rasmussen RA, Watkins JD, Vyas HK, Thorat S, Brandstoetter T, Mukhtar MM, Yoon JK, Novembre FJ, Villinger F, Landucci G, Forthal DN, Ratcliffe S, Tuero I, Robert-Guroff M, Polonis VR, Bilska M, Montefiori DC, Johnson WE, Ertl HC, Ruprecht RM. Passive immunization of macaques with polyclonal anti-SHIV IgG against a heterologou…
458	LNS	2014	24424383	Huang W, Chen L, Zhang B, Park M, Toborek M. PPAR agonist-mediated protection against HIV Tat-induced cerebrovascular toxicity is enhanced in MMP-9-deficient mice. J Cereb Blood Flow Metab. 2014 Apr;34(4):646-53. doi: 10.1038/jcbfm.2013.240. Epub 2014 Jan 15. PubMed PMID: 24424383; PubMed Central PMCID: PMC3982084.
459	PEP	2014	24422492	Lu J, Wong V, Zhang Y, Tran T, Zhao L, Xia A, Xia T, Qi X. Distinct conformational transition patterns of noncoding 7SK snRNA and HIV TAR RNAs upon Tat binding. Biochemistry. 2014 Feb 4;53(4):675-81. doi: 10.1021/bi401131z. Epub 2014 Jan 23. PubMed PMID: 24422492; PubMed Central PMCID: PMC3985858.
460	LNS	2014	24418551	Weber S, Weiser B, Kemal KS, Burger H, Ramirez CM, Korn K, Anastos K, Kaul R, Kovacs C, Doerfler W. Epigenetic analysis of HIV-1 proviral genomes from infected individuals: predominance of unmethylated CpG's. Virology. 2014 Jan 20;449:181-9. doi: 10.1016/j.virol.2013.11.013. Epub 2013 Dec 5. PubMed PMID: 24418551; PubMed Central PMCID: PMC4060985.
461	72	2014	24409324	Dalvi P, Wang K, Mermis J, Zeng R, Sanderson M, Johnson S, Dai Y, Sharma G, Ladner AO, Dhillon NK. HIV-1/cocaine induced oxidative stress disrupts tight junction protein-1 in human pulmonary microvascular endothelial cells: role of Ras/ERK1/2 pathway. PLoS One. 2014 Jan 7;9(1):e85246. doi: 10.1371/journal.pone.0085246. eCollection 2014. PubMed PMID: 24409324; PubMed Central PMCID: PMC3883699.
462	NTU	2014	24387762	Hanna LE, Neogi U, Ranga U, Swaminathan S, Prasad VR. Phylogenetic characterization of six full-length HIV-1 subtype C molecular clones from three patients: identification of rare subtype C strains containing two NF-κB motifs in the long terminal repeat. AIDS Res Hum Retroviruses. 2014 Jun;30(6):586-91. doi: 10.1089/AID.2013.0275. Epub 2014 Feb 7. PubMed PMID: 24387762; PubMed Central PMCID: PMC4…
463	86	2014	26784879	Louboutin JP, Agrawal L, Reyes BA, Van Bockstaele EJ, Strayer DS. Oxidative Stress Is Associated with Neuroinflammation in Animal Models of HIV-1 Tat Neurotoxicity. Antioxidants (Basel). 2014 May 16;3(2):414-38. doi: 10.3390/antiox3020414. PubMed PMID: 26784879; PubMed Central PMCID: PMC4665482.
464	LNS	2014	25893137	Merali S, Barrero CA, Sacktor NC, Haughey NJ, Datta PK, Langford D, Khalili K. Polyamines: Predictive Biomarker for HIV-Associated Neurocognitive Disorders. J AIDS Clin Res. 2014;5(6):1000312. PubMed PMID: 25893137; PubMed Central PMCID: PMC4397651.
465	72	2013	24367500	Lata S, Ronsard L, Sood V, Dar SA, Ramachandran VG, Das S, Banerjea AC. Effect on HIV-1 gene expression, Tat-Vpr interaction and cell apoptosis by natural variants of HIV-1 Tat exon 1 and Vpr from Northern India. PLoS One. 2013 Dec 19;8(12):e82128. doi: 10.1371/journal.pone.0082128. eCollection 2013. PubMed PMID: 24367500; PubMed Central PMCID: PMC3868622.
466	NTU	2014	24361678	Hraber P, Seaman MS, Bailer RT, Mascola JR, Montefiori DC, Korber BT. Prevalence of broadly neutralizing antibody responses during chronic HIV-1 infection. AIDS. 2014 Jan 14;28(2):163-9. doi: 10.1097/QAD.0000000000000106. PubMed PMID: 24361678; PubMed Central PMCID: PMC4042313.
467	PEP	2013	24358298	Dong G, Wang C, Wu Y, Cong J, Cheng L, Wang M, Zhao P, Tang L, Zhang C, Wu K. Tat peptide-mediated soluble expression of the membrane protein LSECtin-CRD in Escherichia coli. PLoS One. 2013 Dec 16;8(12):e83579. doi: 10.1371/journal.pone.0083579. eCollection 2013. PubMed PMID: 24358298; PubMed Central PMCID: PMC3865297.
468	NAP	2013	24356129	Tryoen-Tóth P, Beaumelle B, Bader MF, Vitale N. [HIV-associated cognitive disorders: tat perturbs neurosecretion]. Med Sci (Paris). 2013 Dec;29(12):1069-70. doi: 10.1051/medsci/20132912002. Epub 2013 Dec 20. French. PubMed PMID: 24356129.
469	86	2015	24352707	Hahn YK, Podhaizer EM, Farris SP, Miles MF, Hauser KF, Knapp PE. Effects of chronic HIV-1 Tat exposure in the CNS: heightened vulnerability of males versus females to changes in cell numbers, synaptic integrity, and behavior. Brain Struct Funct. 2015 Mar;220(2):605-23. doi: 10.1007/s00429-013-0676-6. Epub 2013 Dec 19. PubMed PMID: 24352707; PubMed Central PMCID: PMC4341022.
470	86	2014	24352568	Paris JJ, Singh HD, Ganno ML, Jackson P, McLaughlin JP. Anxiety-like behavior of mice produced by conditional central expression of the HIV-1 regulatory protein, Tat. Psychopharmacology (Berl). 2014 Jun;231(11):2349-60. doi: 10.1007/s00213-013-3385-1. Epub 2013 Dec 19. PubMed PMID: 24352568; PubMed Central PMCID: PMC4020990.
471	LNS	2013	24349100	Sasikala-Appukuttan AK, Kim HO, Kinzel NJ, Hong JJ, Smith AJ, Wagstaff R, Reilly C, Piatak M Jr, Lifson JD, Reeves RK, Johnson RP, Haase AT, Skinner PJ. Location and dynamics of the immunodominant CD8 T cell response to SIVΔnef immunization and SIVmac251 vaginal challenge. PLoS One. 2013 Dec 9;8(12):e81623. doi: 10.1371/journal.pone.0081623. eCollection 2013. PubMed PMID: 24349100; PubMed Central…
472	86	2013	24312169	Kim J, Yoon JH, Kim YS. HIV-1 Tat interacts with and regulates the localization and processing of amyloid precursor protein. PLoS One. 2013 Nov 29;8(11):e77972. doi: 10.1371/journal.pone.0077972. eCollection 2013. PubMed PMID: 24312169; PubMed Central PMCID: PMC3843664.
473	NTU	2013	24312168	McLinden RJ, Labranche CC, Chenine AL, Polonis VR, Eller MA, Wieczorek L, Ochsenbauer C, Kappes JC, Perfetto S, Montefiori DC, Michael NL, Kim JH. Detection of HIV-1 neutralizing antibodies in a human CD4⁺/CXCR4⁺/CCR5⁺ T-lymphoblastoid cell assay system. PLoS One. 2013 Nov 28;8(11):e77756. doi: 10.1371/journal.pone.0077756. eCollection 2013. PubMed PMID: 24312168; PubMed Central PMCID: PMC3842913.
474	NTU	2014	24291345	Sarzotti-Kelsoe M, Bailer RT, Turk E, Lin CL, Bilska M, Greene KM, Gao H, Todd CA, Ozaki DA, Seaman MS, Mascola JR, Montefiori DC. Optimization and validation of the TZM-bl assay for standardized assessments of neutralizing antibodies against HIV-1. J Immunol Methods. 2014 Jul;409:131-46. doi: 10.1016/j.jim.2013.11.022. Epub 2013 Dec 1. PubMed PMID: 24291345; PubMed Central PMCID: PMC4040342.
475	LNS	2014	24286982	Burbelo PD, Bayat A, Rhodes CS, Hoh R, Martin JN, Fromentin R, Chomont N, Hütter G, Kovacs JA, Deeks SG. HIV antibody characterization as a method to quantify reservoir size during curative interventions. J Infect Dis. 2014 May 15;209(10):1613-7. doi: 10.1093/infdis/jit667. Epub 2013 Nov 28. PubMed PMID: 24286982; PubMed Central PMCID: PMC3997576.
476	NTU	2013	24277437	de Almeida SM, Ribeiro CE, de Pereira AP, Badiee J, Cherner M, Smith D, Maich I, Raboni SM, Rotta I, Barbosa FJ, Heaton RK, Umlauf A, Ellis RJ. Neurocognitive impairment in HIV-1 clade C- versus B-infected individuals in Southern Brazil. J Neurovirol. 2013 Dec;19(6):550-6. doi: 10.1007/s13365-013-0215-5. Epub 2013 Nov 26. PubMed PMID: 24277437; PubMed Central PMCID: PMC3923762.
477	LNS	2013	24260494	Yin J, Zhu D, Zhang Z, Wang W, Fan J, Men D, Deng J, Wei H, Zhang XE, Cui Z. Imaging of mRNA-protein interactions in live cells using novel mCherry trimolecular fluorescence complementation systems. PLoS One. 2013 Nov 15;8(11):e80851. doi: 10.1371/journal.pone.0080851. eCollection 2013. PubMed PMID: 24260494; PubMed Central PMCID: PMC3829953.
478	86	2013	24255740	Vitale N, Beaumelle B, Bader MF, Tryoen-Tóth P. HIV-1 Tat protein perturbs diacylglycerol production at the plasma membrane of neurosecretory cells during exocytosis. Commun Integr Biol. 2013 Sep 1;6(5):e25145. doi: 10.4161/cib.25145. Epub 2013 May 31. PubMed PMID: 24255740; PubMed Central PMCID: PMC3829902.
479	101	2013	24244375	Nookala AR, Shah A, Noel RJ, Kumar A. HIV-1 Tat-mediated induction of CCL5 in astrocytes involves NF-κB, AP-1, C/EBPα and C/EBPγ transcription factors and JAK, PI3K/Akt and p38 MAPK signaling pathways. PLoS One. 2013 Nov 11;8(11):e78855. doi: 10.1371/journal.pone.0078855. eCollection 2013. PubMed PMID: 24244375; PubMed Central PMCID: PMC3823997.
480	86	2014	24227837	Guendel I, Iordanskiy S, Van Duyne R, Kehn-Hall K, Saifuddin M, Das R, Jaworski E, Sampey GC, Senina S, Shultz L, Narayanan A, Chen H, Lepene B, Zeng C, Kashanchi F. Novel neuroprotective GSK-3β inhibitor restricts Tat-mediated HIV-1 replication. J Virol. 2014 Jan;88(2):1189-208. doi: 10.1128/JVI.01940-13. Epub 2013 Nov 13. PubMed PMID: 24227837; PubMed Central PMCID: PMC3911635.
481	86	2013	24223723	Nicoli F, Finessi V, Sicurella M, Rizzotto L, Gallerani E, Destro F, Cafaro A, Marconi P, Caputo A, Ensoli B, Gavioli R. The HIV-1 Tat protein induces the activation of CD8+ T cells and affects in vivo the magnitude and kinetics of antiviral responses. PLoS One. 2013 Nov 4;8(11):e77746. doi: 10.1371/journal.pone.0077746. eCollection 2013. PubMed PMID: 24223723; PubMed Central PMCID: PMC3817196.
482	86	2014	24217245	Zhao W, Liu Y, Timani KA, He JJ. Tip110 protein binds to unphosphorylated RNA polymerase II and promotes its phosphorylation and HIV-1 long terminal repeat transcription. J Biol Chem. 2014 Jan 3;289(1):190-202. doi: 10.1074/jbc.M113.529784. Epub 2013 Nov 11. PubMed PMID: 24217245; PubMed Central PMCID: PMC3879543.
483	101	2013	24204263	Bruce JW, Reddington R, Mathieu E, Bracken M, Young JA, Ahlquist P. ZASC1 stimulates HIV-1 transcription elongation by recruiting P-TEFb and TAT to the LTR promoter. PLoS Pathog. 2013 Oct;9(10):e1003712. doi: 10.1371/journal.ppat.1003712. Epub 2013 Oct 24. PubMed PMID: 24204263; PubMed Central PMCID: PMC3812036.
484	86	2013	24198379	Hargus NJ, Thayer SA. Human immunodeficiency virus-1 Tat protein increases the number of inhibitory synapses between hippocampal neurons in culture. J Neurosci. 2013 Nov 6;33(45):17908-20. doi: 10.1523/JNEUROSCI.1312-13.2013. PubMed PMID: 24198379; PubMed Central PMCID: PMC3818559.
485	PEP	2013	24193033	Patenge N, Pappesch R, Krawack F, Walda C, Mraheil MA, Jacob A, Hain T, Kreikemeyer B. Inhibition of Growth and Gene Expression by PNA-peptide Conjugates in Streptococcus pyogenes. Mol Ther Nucleic Acids. 2013 Nov 5;2:e132. doi: 10.1038/mtna.2013.62. PubMed PMID: 24193033; PubMed Central PMCID: PMC3889189.
486	86, 101	2013	24165037	Coiras M, Montes M, Montanuy I, López-Huertas MR, Mateos E, Le Sommer C, Garcia-Blanco MA, Hernández-Munain C, Alcamí J, Suñé C. Transcription elongation regulator 1 (TCERG1) regulates competent RNA polymerase II-mediated elongation of HIV-1 transcription and facilitates efficient viral replication. Retrovirology. 2013 Oct 28;10:124. doi: 10.1186/1742-4690-10-124. PubMed PMID: 24165037; PubMed Ce…
487	PEP, 86, 101	2013	24165011	Ben Haij N, Leghmari K, Planès R, Thieblemont N, Bahraoui E. HIV-1 Tat protein binds to TLR4-MD2 and signals to induce TNF-α and IL-10. Retrovirology. 2013 Oct 28;10:123. doi: 10.1186/1742-4690-10-123. PubMed PMID: 24165011; PubMed Central PMCID: PMC4231456.
488	86	2014	24158495	Sorrell ME, Hauser KF. Ligand-gated purinergic receptors regulate HIV-1 Tat and morphine related neurotoxicity in primary mouse striatal neuron-glia co-cultures. J Neuroimmune Pharmacol. 2014 Mar;9(2):233-44. doi: 10.1007/s11481-013-9507-z. Epub 2013 Oct 25. PubMed PMID: 24158495; PubMed Central PMCID: PMC3959217.
489	PEP	2014	24153111	Boudier C, Humbert N, Chaminade F, Chen Y, de Rocquigny H, Godet J, Mauffret O, Fossé P, Mély Y. Dynamic interactions of the HIV-1 Tat with nucleic acids are critical for Tat activity in reverse transcription. Nucleic Acids Res. 2014 Jan;42(2):1065-78. doi: 10.1093/nar/gkt934. Epub 2013 Oct 22. PubMed PMID: 24153111; PubMed Central PMCID: PMC3902927.
490	LNS	2014	24150902	Tilghman MW, Bhattacharya J, Deshpande S, Ghate M, Espitia S, Grant I, Marcotte TD, Smith D, Mehendale S. Genetic attributes of blood-derived subtype-C HIV-1 tat and env in India and neurocognitive function. J Med Virol. 2014 Jan;86(1):88-96. doi: 10.1002/jmv.23816. Epub 2013 Oct 22. PubMed PMID: 24150902; PubMed Central PMCID: PMC3872113.
491	PEP	2013	24147034	Kumar S, Maiti S. The effect of N-acetylation and N-methylation of lysine residue of Tat peptide on its interaction with HIV-1 TAR RNA. PLoS One. 2013 Oct 17;8(10):e77595. doi: 10.1371/journal.pone.0077595. eCollection 2013. PubMed PMID: 24147034; PubMed Central PMCID: PMC3798303.
492	86, PEP	2013	24073214	Planès R, Bahraoui E. HIV-1 Tat protein induces the production of IDO in human monocyte derived-dendritic cells through a direct mechanism: effect on T cells proliferation. PLoS One. 2013 Sep 20;8(9):e74551. doi: 10.1371/journal.pone.0074551. eCollection 2013. Erratum in: PLoS One. 2013;8(11). doi:10.1371/annotation/d333f74d-496e-48e7-ac30-6dcfdbd7a25b. PubMed PMID: 24073214; PubMed Central PMCID…
493	72	2013	24044867	Goodfellow VS, Loweth CJ, Ravula SB, Wiemann T, Nguyen T, Xu Y, Todd DE, Sheppard D, Pollack S, Polesskaya O, Marker DF, Dewhurst S, Gelbard HA. Discovery, synthesis, and characterization of an orally bioavailable, brain penetrant inhibitor of mixed lineage kinase 3. J Med Chem. 2013 Oct 24;56(20):8032-48. doi: 10.1021/jm401094t. Epub 2013 Oct 3. PubMed PMID: 24044867; PubMed Central PMCID: PMC40…
494	PEP	2013	24025624	Ponia SS, Arora S, Kumar B, Banerjea AC. Arginine rich short linear motif of HIV-1 regulatory proteins inhibits dicer dependent RNA interference. Retrovirology. 2013 Sep 11;10:97. doi: 10.1186/1742-4690-10-97. PubMed PMID: 24025624; PubMed Central PMCID: PMC3848888.
495	PEP	2013	24012122	Ranjan N, Kumar S, Watkins D, Wang D, Appella DH, Arya DP. Recognition of HIV-TAR RNA using neomycin-benzimidazole conjugates. Bioorg Med Chem Lett. 2013 Oct 15;23(20):5689-93. doi: 10.1016/j.bmcl.2013.08.014. Epub 2013 Aug 14. PubMed PMID: 24012122; PubMed Central PMCID: PMC4048829.
496	LNS	2013	24008158	Dalvi P, O'Brien-Ladner A, Dhillon NK. Downregulation of bone morphogenetic protein receptor axis during HIV-1 and cocaine-mediated pulmonary smooth muscle hyperplasia: implications for HIV-related pulmonary arterial hypertension. Arterioscler Thromb Vasc Biol. 2013 Nov;33(11):2585-95. doi: 10.1161/ATVBAHA.113.302054. Epub 2013 Sep 5. Erratum in: Arterioscler Thromb Vasc Biol. 2014 Dec;34(12):e24…
497	86	2013	24002730	Centlivre M, Legrand N, Klamer S, Liu YP, Jasmijn von Eije K, Bohne M, Rijnstra ES, Weijer K, Blom B, Voermans C, Spits H, Berkhout B. Preclinical in vivo evaluation of the safety of a multi-shRNA-based gene therapy against HIV-1. Mol Ther Nucleic Acids. 2013 Sep 3;2:e120. doi: 10.1038/mtna.2013.48. PubMed PMID: 24002730; PubMed Central PMCID: PMC3808742.
498	NTU	2013	23986795	Abbas W, Herbein G. T-Cell Signaling in HIV-1 Infection. Open Virol J. 2013 Jul 26;7:57-71. doi: 10.2174/1874357920130621001. eCollection 2013. PubMed PMID: 23986795; PubMed Central PMCID: PMC3751038.
499	86	2013	23977945	Sczepanski JT, Joyce GF. Binding of a structured D-RNA molecule by an L-RNA aptamer. J Am Chem Soc. 2013 Sep 11;135(36):13290-3. doi: 10.1021/ja406634g. Epub 2013 Aug 28. PubMed PMID: 23977945; PubMed Central PMCID: PMC3804424.
500	NTU	2013	23977084	Chapman R, Stutz H, Jacobs W Jr, Shephard E, Williamson AL. Priming with recombinant auxotrophic BCG expressing HIV-1 Gag, RT and Gp120 and boosting with recombinant MVA induces a robust T cell response in mice. PLoS One. 2013 Aug 20;8(8):e71601. doi: 10.1371/journal.pone.0071601. eCollection 2013. Erratum in: PLoS One. 2013 Sep 6;8(9):. PubMed PMID: 23977084; PubMed Central PMCID: PMC3748047.
501	PEP	2013	23965546	Ozaki T, Nakazawa M, Yamashita T, Tomita H, Ebina Y, Ishiguro S. Decrease of ATP by mitochondrial m-calpain inhibitory peptide in the rat retinas. Cell Struct Funct. 2013;38(2):207-23. Epub 2013 Aug 20. PubMed PMID: 23965546.
502	101	2014	23955241	Darbinian N, Khalili K, Amini S. Neuroprotective activity of pDING in response to HIV-1 Tat. J Cell Physiol. 2014 Feb;229(2):153-61. doi: 10.1002/jcp.24392. PubMed PMID: 23955241; PubMed Central PMCID: PMC4204488.
503	86	2013	23945945	Wong RW, Balachandran A, Haaland M, Stoilov P, Cochrane A. Characterization of novel inhibitors of HIV-1 replication that function via alteration of viral RNA processing and rev function. Nucleic Acids Res. 2013 Nov;41(20):9471-83. doi: 10.1093/nar/gkt727. Epub 2013 Aug 13. PubMed PMID: 23945945; PubMed Central PMCID: PMC3814367.
504	86	2014	23945478	Paris JJ, Carey AN, Shay CF, Gomes SM, He JJ, McLaughlin JP. Effects of conditional central expression of HIV-1 tat protein to potentiate cocaine-mediated psychostimulation and reward among male mice. Neuropsychopharmacology. 2014 Jan;39(2):380-8. doi: 10.1038/npp.2013.201. Epub 2013 Aug 15. PubMed PMID: 23945478; PubMed Central PMCID: PMC3870789.
505	PEP	2013	23922923	Salomone F, Cardarelli F, Signore G, Boccardi C, Beltram F. In vitro efficient transfection by CM₁₈-Tat₁₁ hybrid peptide: a new tool for gene-delivery applications. PLoS One. 2013 Jul 29;8(7):e70108. doi: 10.1371/journal.pone.0070108. Print 2013. PubMed PMID: 23922923; PubMed Central PMCID: PMC3726494.
506	86	2013	23916815	Cardaci S, Soster M, Bussolino F, Marchiò S. The V1/V2 loop of HIV-1 gp120 is necessary for Tat binding and consequent modulation of virus entry. FEBS Lett. 2013 Sep 17;587(18):2943-51. doi: 10.1016/j.febslet.2013.07.039. Epub 2013 Jul 31. PubMed PMID: 23916815.
507	NTU	2013	23886531	Longenecker CT, Jiang Y, Yun CH, Debanne S, Funderburg NT, Lederman MM, Storer N, Labbato DE, Bezerra HG, McComsey GA. Perivascular fat, inflammation, and cardiovascular risk in HIV-infected patients on antiretroviral therapy. Int J Cardiol. 2013 Oct 9;168(4):4039-45. doi: 10.1016/j.ijcard.2013.06.059. Epub 2013 Jul 22. PubMed PMID: 23886531; PubMed Central PMCID: PMC3805774.
508	LNS	2013	23884411	Natarajan M, Schiralli Lester GM, Lee C, Missra A, Wasserman GA, Steffen M, Gilmour DS, Henderson AJ. Negative elongation factor (NELF) coordinates RNA polymerase II pausing, premature termination, and chromatin remodeling to regulate HIV transcription. J Biol Chem. 2013 Sep 6;288(36):25995-6003. doi: 10.1074/jbc.M113.496489. Epub 2013 Jul 24. PubMed PMID: 23884411; PubMed Central PMCID: PMC37648…
509	PEP	2013	23884410	Rickhag M, Owens WA, Winkler MT, Strandfelt KN, Rathje M, Sørensen G, Andresen B, Madsen KL, Jørgensen TN, Wörtwein G, Woldbye DP, Sitte H, Daws LC, Gether U. Membrane-permeable C-terminal dopamine transporter peptides attenuate amphetamine-evoked dopamine release. J Biol Chem. 2013 Sep 20;288(38):27534-44. doi: 10.1074/jbc.M112.441295. Epub 2013 Jul 24. PubMed PMID: 23884410; PubMed Central PMCI…
510	NTU	2013	23881028	Isaguliants M, Smirnova O, Ivanov AV, Kilpelainen A, Kuzmenko Y, Petkov S, Latanova A, Krotova O, Engström G, Karpov V, Kochetkov S, Wahren B, Starodubova E. Oxidative stress induced by HIV-1 reverse transcriptase modulates the enzyme's performance in gene immunization. Hum Vaccin Immunother. 2013 Oct;9(10):2111-9. doi: 10.4161/hv.25813. Epub 2013 Jul 23. PubMed PMID: 23881028; PubMed Central PMC…
511	86	2014	23875777	Bertrand SJ, Mactutus CF, Aksenova MV, Espensen-Sturges TD, Booze RM. Synaptodendritic recovery following HIV Tat exposure: neurorestoration by phytoestrogens. J Neurochem. 2014 Jan;128(1):140-51. doi: 10.1111/jnc.12375. Epub 2013 Aug 26. PubMed PMID: 23875777; PubMed Central PMCID: PMC4041987.
512	LNS	2013	23874178	Miller-Jensen K, Skupsky R, Shah PS, Arkin AP, Schaffer DV. Genetic selection for context-dependent stochastic phenotypes: Sp1 and TATA mutations increase phenotypic noise in HIV-1 gene expression. PLoS Comput Biol. 2013;9(7):e1003135. doi: 10.1371/journal.pcbi.1003135. Epub 2013 Jul 11. PubMed PMID: 23874178; PubMed Central PMCID: PMC3708878.
513	86	2013	23866860	Singhroy DN, Mesplède T, Sabbah A, Quashie PK, Falgueyret JP, Wainberg MA. Automethylation of protein arginine methyltransferase 6 (PRMT6) regulates its stability and its anti-HIV-1 activity. Retrovirology. 2013 Jul 17;10:73. doi: 10.1186/1742-4690-10-73. PubMed PMID: 23866860; PubMed Central PMCID: PMC3750301.
514	86	2013	23861855	Monette A, Valiente-Echeverría F, Rivero M, Cohen ÉA, Lopez-Lastra M, Mouland AJ. Dual mechanisms of translation initiation of the full-length HIV-1 mRNA contribute to gag synthesis. PLoS One. 2013 Jul 5;8(7):e68108. doi: 10.1371/journal.pone.0068108. Print 2013. PubMed PMID: 23861855; PubMed Central PMCID: PMC3702555.
515	LNS	2013	23840900	Lai MC, Wang SW, Cheng L, Tarn WY, Tsai SJ, Sun HS. Human DDX3 interacts with the HIV-1 Tat protein to facilitate viral mRNA translation. PLoS One. 2013 Jul 1;8(7):e68665. doi: 10.1371/journal.pone.0068665. Print 2013. PubMed PMID: 23840900; PubMed Central PMCID: PMC3698215.
516	101	2014	23826737	Mates JM, Kumar SB, Bazan J, Mefford M, Voronkin I, Handelman S, Mwapasa V, Ackerman W 4th, Janies D, Kwiek JJ. Genotypic and phenotypic heterogeneity in the U3R region of HIV type 1 subtype C. AIDS Res Hum Retroviruses. 2014 Jan;30(1):102-12. doi: 10.1089/AID.2013.0026. Epub 2013 Aug 12. PubMed PMID: 23826737; PubMed Central PMCID: PMC3887403.
517	101	2013	23826228	He M, Zhang L, Wang X, Huo L, Sun L, Feng C, Jing X, Du D, Liang H, Liu M, Hong Z, Zhou J. Systematic Analysis of the Functions of Lysine Acetylation in the Regulation of Tat Activity. PLoS One. 2013 Jun 27;8(6):e67186. doi: 10.1371/journal.pone.0067186. Print 2013. PubMed PMID: 23826228; PubMed Central PMCID: PMC3695041.
518	LNS	2013	23822148	Timani KA, Liu Y, He JJ. Tip110 interacts with YB-1 and regulates each other's function. BMC Mol Biol. 2013 Jul 4;14:14. doi: 10.1186/1471-2199-14-14. PubMed PMID: 23822148; PubMed Central PMCID: PMC3716619.
519	101	2013	23811558	Jeong JJ, Kim B, Kim DH. Ginsenoside Rh1 eliminates the cytoprotective phenotype of human immunodeficiency virus type 1-transduced human macrophages by inhibiting the phosphorylation of pyruvate dehydrogenase lipoamide kinase isozyme 1. Biol Pharm Bull. 2013;36(7):1088-94. PubMed PMID: 23811558.
520	86, 101	2013	23811015	Bertrand SJ, Aksenova MV, Mactutus CF, Booze RM. HIV-1 Tat protein variants: critical role for the cysteine region in synaptodendritic injury. Exp Neurol. 2013 Oct;248:228-35. doi: 10.1016/j.expneurol.2013.06.020. Epub 2013 Jun 26. PubMed PMID: 23811015; PubMed Central PMCID: PMC3773475.
521	LNS	2013	23806696	Joly M, Odloak D. Modeling interleukin-2-based immunotherapy in AIDS pathogenesis. J Theor Biol. 2013 Oct 21;335:57-78. doi: 10.1016/j.jtbi.2013.06.019. Epub 2013 Jun 25. PubMed PMID: 23806696.
522	86	2013	23804632	Donahue DA, Bastarache SM, Sloan RD, Wainberg MA. Latent HIV-1 can be reactivated by cellular superinfection in a Tat-dependent manner, which can lead to the emergence of multidrug-resistant recombinant viruses. J Virol. 2013 Sep;87(17):9620-32. doi: 10.1128/JVI.01165-13. Epub 2013 Jun 26. PubMed PMID: 23804632; PubMed Central PMCID: PMC3754111.
523	PEP	2013	23800339	Bachler BC, Humbert M, Lakhashe SK, Rasmussen RA, Ruprecht RM. Live-virus exposure of vaccine-protected macaques alters the anti-HIV-1 antibody repertoire in the absence of viremia. Retrovirology. 2013 Jun 21;10:63. doi: 10.1186/1742-4690-10-63. PubMed PMID: 23800339; PubMed Central PMCID: PMC3695773.
524	101	2013	23800116	Sivakumaran H, Lin MH, Apolloni A, Cutillas V, Jin H, Li D, Wei T, Harrich D. Overexpression of PRMT6 does not suppress HIV-1 Tat transactivation in cells naturally lacking PRMT6. Virol J. 2013 Jun 24;10:207. doi: 10.1186/1743-422X-10-207. PubMed PMID: 23800116; PubMed Central PMCID: PMC3695826.
525	NTU	2013	23800048	Kumtepe Y, Halici Z, Sengul O, Kunak CS, Bayir Y, Kilic N, Cadirci E, Pulur A, Bayraktutan Z. High serum HTATIP2/TIP30 level in serous ovarian cancer as prognostic or diagnostic marker. Eur J Med Res. 2013 Jun 24;18:18. doi: 10.1186/2047-783X-18-18. PubMed PMID: 23800048; PubMed Central PMCID: PMC3695774.
526	72, 86	2013	23762271	Sengupta S, Powell E, Kong L, Blackard JT. Effects of HCV on basal and tat-induced HIV LTR activation. PLoS One. 2013 Jun 10;8(6):e64956. doi: 10.1371/journal.pone.0064956. Print 2013. PubMed PMID: 23762271; PubMed Central PMCID: PMC3677892.
527	72, 101	2013	23761895	Marker DF, Tremblay MÈ, Puccini JM, Barbieri J, Gantz Marker MA, Loweth CJ, Muly EC, Lu SM, Goodfellow VS, Dewhurst S, Gelbard HA. The new small-molecule mixed-lineage kinase 3 inhibitor URMC-099 is neuroprotective and anti-inflammatory in models of human immunodeficiency virus-associated neurocognitive disorders. J Neurosci. 2013 Jun 12;33(24):9998-10010. doi: 10.1523/JNEUROSCI.0598-13.2013. Pub…
528	101	2013	23758766	Rao VR, Neogi U, Talboom JS, Padilla L, Rahman M, Fritz-French C, Gonzalez-Ramirez S, Verma A, Wood C, Ruprecht RM, Ranga U, Azim T, Joska J, Eugenin E, Shet A, Bimonte-Nelson H, Tyor WR, Prasad VR. Clade C HIV-1 isolates circulating in Southern Africa exhibit a greater frequency of dicysteine motif-containing Tat variants than those in Southeast Asia and cause increased neurovirulence. Retroviro…
529	86	2013	23751259	El-Hage N, Dever SM, Podhaizer EM, Arnatt CK, Zhang Y, Hauser KF. A novel bivalent HIV-1 entry inhibitor reveals fundamental differences in CCR5-μ-opioid receptor interactions between human astroglia and microglia. AIDS. 2013 Sep 10;27(14):2181-90. doi: 10.1097/QAD.0b013e3283639804. PubMed PMID: 23751259; PubMed Central PMCID: PMC3918492.
530	72	2013	23738010	Liu J, Xu P, Collins C, Liu H, Zhang J, Keblesh JP, Xiong H. HIV-1 Tat protein increases microglial outward K(+) current and resultant neurotoxic activity. PLoS One. 2013 May 30;8(5):e64904. doi: 10.1371/journal.pone.0064904. Print 2013. PubMed PMID: 23738010; PubMed Central PMCID: PMC3667810.
531	PEP	2013	23732912	Suzuki Y, Roy CN, Promjunyakul W, Hatakeyama H, Gonda K, Imamura J, Vasudevanpillai B, Ohuchi N, Kanzaki M, Higuchi H, Kaku M. Single quantum dot tracking reveals that an individual multivalent HIV-1 Tat protein transduction domain can activate machinery for lateral transport and endocytosis. Mol Cell Biol. 2013 Aug;33(15):3036-49. doi: 10.1128/MCB.01717-12. Epub 2013 Jun 3. PubMed PMID: 23732912…
532	PEP	2013	23711826	Katayama S, Nakase I, Yano Y, Murayama T, Nakata Y, Matsuzaki K, Futaki S. Effects of pyrenebutyrate on the translocation of arginine-rich cell-penetrating peptides through artificial membranes: recruiting peptides to the membranes, dissipating liquid-ordered phases, and inducing curvature. Biochim Biophys Acta. 2013 Sep;1828(9):2134-42. doi: 10.1016/j.bbamem.2013.05.016. Epub 2013 May 24. PubMed…
533	86	2013	23691059	Seay K, Qi X, Zheng JH, Zhang C, Chen K, Dutta M, Deneroff K, Ochsenbauer C, Kappes JC, Littman DR, Goldstein H. Mice transgenic for CD4-specific human CD4, CCR5 and cyclin T1 expression: a new model for investigating HIV-1 transmission and treatment efficacy. PLoS One. 2013 May 15;8(5):e63537. doi: 10.1371/journal.pone.0063537. Print 2013. PubMed PMID: 23691059; PubMed Central PMCID: PMC3655194.
534	101	2013	23682308	Yuan Y, Arnatt CK, El-Hage N, Dever SM, Jacob JC, Selley DE, Hauser KF, Zhang Y. A Bivalent Ligand Targeting the Putative Mu Opioid Receptor and Chemokine Receptor CCR5 Heterodimers: Binding Affinity versus Functional Activities. Medchemcomm. 2013 May 1;4(5):847-851. PubMed PMID: 23682308; PubMed Central PMCID: PMC3652433.
535	LNS	2013	23678366	Nekhai S, Kumari N, Dhawan S. Role of cellular iron and oxygen in the regulation of HIV-1 infection. Future Virol. 2013 Mar;8(3):301-311. PubMed PMID: 23678366; PubMed Central PMCID: PMC3652425.
536	PEP	2013	23678001	Mediouni S, Darque A, Ravaux I, Baillat G, Devaux C, Loret EP. Identification of a highly conserved surface on Tat variants. J Biol Chem. 2013 Jun 28;288(26):19072-80. doi: 10.1074/jbc.M113.466011. Epub 2013 May 15. PubMed PMID: 23678001; PubMed Central PMCID: PMC3696680.
537	PEP, 72, 86, 101	2013	23673310	Chen X, Hui L, Geiger NH, Haughey NJ, Geiger JD. Endolysosome involvement in HIV-1 transactivator protein-induced neuronal amyloid beta production. Neurobiol Aging. 2013 Oct;34(10):2370-8. doi: 10.1016/j.neurobiolaging.2013.04.015. Epub 2013 May 11. PubMed PMID: 23673310; PubMed Central PMCID: PMC3706576.
538	86	2013	23657884	Contreras-Galindo R, Kaplan MH, He S, Contreras-Galindo AC, Gonzalez-Hernandez MJ, Kappes F, Dube D, Chan SM, Robinson D, Meng F, Dai M, Gitlin SD, Chinnaiyan AM, Omenn GS, Markovitz DM. HIV infection reveals widespread expansion of novel centromeric human endogenous retroviruses. Genome Res. 2013 Sep;23(9):1505-13. doi: 10.1101/gr.144303.112. Epub 2013 May 8. PubMed PMID: 23657884; PubMed Centra…
539	72, 86, 101	2013	23645138	Midde NM, Huang X, Gomez AM, Booze RM, Zhan CG, Zhu J. Mutation of tyrosine 470 of human dopamine transporter is critical for HIV-1 Tat-induced inhibition of dopamine transport and transporter conformational transitions. J Neuroimmune Pharmacol. 2013 Sep;8(4):975-87. doi: 10.1007/s11481-013-9464-6. Epub 2013 May 5. PubMed PMID: 23645138; PubMed Central PMCID: PMC3740080.
540	LNS	2013	23611845	Hong HW, Lee SW, Myung H. Induced degradation of Tat by nucleocapsid (NC) via the proteasome pathway and its effect on HIV transcription. Viruses. 2013 Apr 23;5(4):1143-52. doi: 10.3390/v5041143. PubMed PMID: 23611845; PubMed Central PMCID: PMC3705270.
541	PEP	2013	23605042	Pascale L, Azoulay S, Di Giorgio A, Zenacker L, Gaysinski M, Clayette P, Patino N. Thermodynamic studies of a series of homologous HIV-1 TAR RNA ligands reveal that loose binders are stronger Tat competitors than tight ones. Nucleic Acids Res. 2013 Jun;41(11):5851-63. doi: 10.1093/nar/gkt237. Epub 2013 Apr 19. PubMed PMID: 23605042; PubMed Central PMCID: PMC3675469.
542	86, 101	2013	23569210	Gao G, Wu X, Zhou J, He M, He JJ, Guo D. Inhibition of HIV-1 transcription and replication by a newly identified cyclin T1 splice variant. J Biol Chem. 2013 May 17;288(20):14297-309. doi: 10.1074/jbc.M112.438465. Epub 2013 Apr 8. PubMed PMID: 23569210; PubMed Central PMCID: PMC3656286.
543	PEP, 86, 101	2013	23565278	Chen Q, Li L, Liao W, Zhang H, Wang J, Sheng B, Zhang H, Huang X, Ding Y, Zhang T, Cao J, Wu H, Pan W. Characterization of Tat antibody responses in Chinese individuals infected with HIV-1. PLoS One. 2013;8(4):e60825. doi: 10.1371/journal.pone.0060825. Epub 2013 Apr 2. PubMed PMID: 23565278; PubMed Central PMCID: PMC3614898.
544	86	2013	23562537	Pfeiffer T, Ruppert T, Schaal H, Bosch V. Detection and initial characterization of protein entities consisting of the HIV glycoprotein cytoplasmic C-terminal domain alone. Virology. 2013 Jun 20;441(1):85-94. doi: 10.1016/j.virol.2013.03.009. Epub 2013 Apr 3. PubMed PMID: 23562537.
545	LNS	2013	23555914	Duan M, Yao H, Hu G, Chen X, Lund AK, Buch S. HIV Tat induces expression of ICAM-1 in HUVECs: implications for miR-221/-222 in HIV-associated cardiomyopathy. PLoS One. 2013;8(3):e60170. doi: 10.1371/journal.pone.0060170. Epub 2013 Mar 28. PubMed PMID: 23555914; PubMed Central PMCID: PMC3610892.
546	LNS	2013	23554480	Mishra R, Singh SK. HIV-1 Tat C modulates expression of miRNA-101 to suppress VE-cadherin in human brain microvascular endothelial cells. J Neurosci. 2013 Apr 3;33(14):5992-6000. doi: 10.1523/JNEUROSCI.4796-12.2013. PubMed PMID: 23554480; PubMed Central PMCID: PMC6618916.
547	NTU	2013	23536773	Fraternale A, Crinelli R, Casabianca A, Paoletti MF, Orlandi C, Carloni E, Smietana M, Palamara AT, Magnani M. Molecules altering the intracellular thiol content modulate NF-kB and STAT-1/IRF-1 signalling pathways and IL-12 p40 and IL-27 p28 production in murine macrophages. PLoS One. 2013;8(3):e57866. doi: 10.1371/journal.pone.0057866. Epub 2013 Mar 11. PubMed PMID: 23536773; PubMed Central PMCI…
548	PEP, 101	2013	23535064	Kim N, Kukkonen S, Martinez-Viedma Mdel P, Gupta S, Aldovini A. Tat engagement of p38 MAP kinase and IRF7 pathways leads to activation of interferon-stimulated genes in antigen-presenting cells. Blood. 2013 May 16;121(20):4090-100. doi: 10.1182/blood-2012-10-461566. Epub 2013 Mar 27. PubMed PMID: 23535064; PubMed Central PMCID: PMC3656449.
549	86	2013	23530915	Tomo N, Goto T, Morikawa Y. Trans-packaging of human immunodeficiency virus type 1 genome into Gag virus-like particles in Saccharomyces cerevisiae. Microb Cell Fact. 2013 Mar 26;12:28. doi: 10.1186/1475-2859-12-28. PubMed PMID: 23530915; PubMed Central PMCID: PMC3623794.
550	NTU	2013	23516440	Lake JE, Tseng CH, Currier JS. A pilot study of telmisartan for visceral adiposity in HIV infection: the metabolic abnormalities, telmisartan, and HIV infection (MATH) trial. PLoS One. 2013;8(3):e58135. doi: 10.1371/journal.pone.0058135. Epub 2013 Mar 14. PubMed PMID: 23516440; PubMed Central PMCID: PMC3597631.
551	NTU	2013	23497153	Konkoli Z, Jesorka A. Fluctuations in Tat copy number when it counts the most: a possible mechanism to battle the HIV latency. Theor Biol Med Model. 2013 Mar 5;10:16. doi: 10.1186/1742-4682-10-16. PubMed PMID: 23497153; PubMed Central PMCID: PMC3686706.
552	72, 101	2013	23487450	Rossenkhan R, MacLeod IJ, Sebunya TK, Castro-Nallar E, McLane MF, Musonda R, Gashe BA, Novitsky V, Essex M. tat Exon 1 exhibits functional diversity during HIV-1 subtype C primary infection. J Virol. 2013 May;87(10):5732-45. doi: 10.1128/JVI.03297-12. Epub 2013 Mar 13. PubMed PMID: 23487450; PubMed Central PMCID: PMC3648179.
553	86	2013	23481247	Pfeiffer T, Erkelenz S, Widera M, Schaal H, Bosch V. Mutational analysis of the internal membrane proximal domain of the HIV glycoprotein C-terminus. Virology. 2013 May 25;440(1):31-40. doi: 10.1016/j.virol.2013.01.025. Epub 2013 Mar 5. PubMed PMID: 23481247.
554	86	2013	23471103	Schulze-Gahmen U, Upton H, Birnberg A, Bao K, Chou S, Krogan NJ, Zhou Q, Alber T. The AFF4 scaffold binds human P-TEFb adjacent to HIV Tat. Elife. 2013 Mar 5;2:e00327. doi: 10.7554/eLife.00327. PubMed PMID: 23471103; PubMed Central PMCID: PMC3589825.
555	101	2013	23418465	Mehendale S, Thakar M, Sahay S, Kumar M, Shete A, Sathyamurthi P, Verma A, Kurle S, Shrotri A, Gilmour J, Goyal R, Dally L, Sayeed E, Zachariah D, Ackland J, Kochhar S, Cox JH, Excler JL, Kumaraswami V, Paranjape R, Ramanathan VD. Safety and immunogenicity of DNA and MVA HIV-1 subtype C vaccine prime-boost regimens: a phase I randomised Trial in HIV-uninfected Indian volunteers. PLoS One. 2013;8(…
556	86	2013	23392246	Eilebrecht S, Wilhelm E, Benecke BJ, Bell B, Benecke AG. HMGA1 directly interacts with TAR to modulate basal and Tat-dependent HIV transcription. RNA Biol. 2013 Mar;10(3):436-44. doi: 10.4161/rna.23686. Epub 2013 Feb 7. PubMed PMID: 23392246; PubMed Central PMCID: PMC3672287.
557	PEP, 86	2013	23388727	Bachler BC, Humbert M, Palikuqi B, Siddappa NB, Lakhashe SK, Rasmussen RA, Ruprecht RM. Novel biopanning strategy to identify epitopes associated with vaccine protection. J Virol. 2013 Apr;87(8):4403-16. doi: 10.1128/JVI.02888-12. Epub 2013 Feb 6. PubMed PMID: 23388727; PubMed Central PMCID: PMC3624354.
558	72	2013	23376103	Davis RL, Das S, Buck DJ, Stevens CW. Β-funaltrexamine inhibits chemokine (CXCL10) expression in normal human astrocytes. Neurochem Int. 2013 Mar;62(4):478-85. doi: 10.1016/j.neuint.2013.01.013. Epub 2013 Jan 31. PubMed PMID: 23376103; PubMed Central PMCID: PMC3604055.
559	NTU	2013	23370386	Karn J. A new BET on the control of HIV latency. Cell Cycle. 2013 Feb 15;12(4):545-6. doi: 10.4161/cc.23679. Epub 2013 Jan 31. PubMed PMID: 23370386; PubMed Central PMCID: PMC3594254.
560	72, 101	2013	23364796	López-Huertas MR, Mateos E, Sánchez Del Cojo M, Gómez-Esquer F, Díaz-Gil G, Rodríguez-Mora S, López JA, Calvo E, López-Campos G, Alcamí J, Coiras M. The presence of HIV-1 Tat protein second exon delays fas protein-mediated apoptosis in CD4+ T lymphocytes: a potential mechanism for persistent viral production. J Biol Chem. 2013 Mar 15;288(11):7626-44. doi: 10.1074/jbc.M112.408294. Epub 2013 Jan 30…
561	LNS	2013	23364794	Beloglazova N, Flick R, Tchigvintsev A, Brown G, Popovic A, Nocek B, Yakunin AF. Nuclease activity of the human SAMHD1 protein implicated in the Aicardi-Goutieres syndrome and HIV-1 restriction. J Biol Chem. 2013 Mar 22;288(12):8101-10. doi: 10.1074/jbc.M112.431148. Epub 2013 Jan 30. PubMed PMID: 23364794; PubMed Central PMCID: PMC3605629.
562	PEP	2013	23364696	Shoji-Kawata S, Sumpter R, Leveno M, Campbell GR, Zou Z, Kinch L, Wilkins AD, Sun Q, Pallauf K, MacDuff D, Huerta C, Virgin HW, Helms JB, Eerland R, Tooze SA, Xavier R, Lenschow DJ, Yamamoto A, King D, Lichtarge O, Grishin NV, Spector SA, Kaloyanova DV, Levine B. Identification of a candidate therapeutic autophagy-inducing peptide. Nature. 2013 Feb 14;494(7436):201-6. doi: 10.1038/nature11866. Ep…
563	NTU	2013	23324342	Rice AP. P-TEFb as a target to reactivate latent HIV: two Brds are now in hand. Cell Cycle. 2013 Feb 1;12(3):392-3. doi: 10.4161/cc.23556. Epub 2013 Jan 16. PubMed PMID: 23324342; PubMed Central PMCID: PMC3587438.
564	PEP, 101	2013	23301033	Zhou F, Xue M, Qin D, Zhu X, Wang C, Zhu J, Hao T, Cheng L, Chen X, Bai Z, Feng N, Gao SJ, Lu C. HIV-1 Tat promotes Kaposi's sarcoma-associated herpesvirus (KSHV) vIL-6-induced angiogenesis and tumorigenesis by regulating PI3K/PTEN/AKT/GSK-3β signaling pathway. PLoS One. 2013;8(1):e53145. doi: 10.1371/journal.pone.0053145. Epub 2013 Jan 2. PubMed PMID: 23301033; PubMed Central PMCID: PMC3534639.
565	86	2012	23300569	Zeng W, Chen YC, Bai Y, Trang P, Vu GP, Lu S, Wu J, Liu F. Effective inhibition of human immunodeficiency virus 1 replication by engineered RNase P ribozyme. PLoS One. 2012;7(12):e51855. doi: 10.1371/journal.pone.0051855. Epub 2012 Dec 26. PubMed PMID: 23300569; PubMed Central PMCID: PMC3530568.
566	101	2013	23298160	Apolloni A, Lin MH, Sivakumaran H, Li D, Kershaw MH, Harrich D. A mutant Tat protein provides strong protection from HIV-1 infection in human CD4+ T cells. Hum Gene Ther. 2013 Mar;24(3):270-82. doi: 10.1089/hum.2012.176. Epub 2013 Mar 1. PubMed PMID: 23298160; PubMed Central PMCID: PMC3696950.
567	NTU	2012	23275707	Shapshak P. Molecule of the month HIV-1 Tat and miRNA. Bioinformation. 2012;8(23):1123-4. doi: 10.6026/97320630081123. Epub 2012 Nov 23. PubMed PMID: 23275707; PubMed Central PMCID: PMC3530879.
568	101	2013	23274668	Hamasaki T, Okamoto M, Baba M. Identification of novel inhibitors of human immunodeficiency virus type 1 replication by in silico screening targeting cyclin T1/Tat interaction. Antimicrob Agents Chemother. 2013 Mar;57(3):1323-31. doi: 10.1128/AAC.01711-12. Epub 2012 Dec 28. PubMed PMID: 23274668; PubMed Central PMCID: PMC3591921.
569	PEP	2013	25408877	Ru R, Yao Y, Yu S, Yin B, Xu W, Zhao S, Qin L, Chen X. Targeted genome engineering in human induced pluripotent stem cells by penetrating TALENs. Cell Regen (Lond). 2013 Jun 18;2(1):5. doi: 10.1186/2045-9769-2-5. eCollection 2013. PubMed PMID: 25408877; PubMed Central PMCID: PMC4230761.
570	86	2013	23269344	Carey AN, Liu X, Mintzopoulos D, Paris JJ, Muschamp JW, McLaughlin JP, Kaufman MJ. Conditional Tat protein expression in the GT-tg bigenic mouse brain induces gray matter density reductions. Prog Neuropsychopharmacol Biol Psychiatry. 2013 Jun 3;43:49-54. doi: 10.1016/j.pnpbp.2012.12.018. Epub 2012 Dec 23. PubMed PMID: 23269344; PubMed Central PMCID: PMC3612135.
571	86, 101	2013	23267846	Shin AH, Thayer SA. Human immunodeficiency virus-1 protein Tat induces excitotoxic loss of presynaptic terminals in hippocampal cultures. Mol Cell Neurosci. 2013 May;54:22-9. doi: 10.1016/j.mcn.2012.12.005. Epub 2012 Dec 23. PubMed PMID: 23267846; PubMed Central PMCID: PMC3622188.
572	LNS	2013	23255218	Boehm D, Calvanese V, Dar RD, Xing S, Schroeder S, Martins L, Aull K, Li PC, Planelles V, Bradner JE, Zhou MM, Siliciano RF, Weinberger L, Verdin E, Ott M. BET bromodomain-targeting compounds reactivate HIV from latency via a Tat-independent mechanism. Cell Cycle. 2013 Feb 1;12(3):452-62. doi: 10.4161/cc.23309. Epub 2012 Feb 1. PubMed PMID: 23255218; PubMed Central PMCID: PMC3587446.
573	101	2012	23251541	Lin MH, Sivakumaran H, Apolloni A, Wei T, Jans DA, Harrich D. Nullbasic, a potent anti-HIV tat mutant, induces CRM1-dependent disruption of HIV rev trafficking. PLoS One. 2012;7(12):e51466. doi: 10.1371/journal.pone.0051466. Epub 2012 Dec 10. PubMed PMID: 23251541; PubMed Central PMCID: PMC3519632.
574	PEP, 86	2013	23251033	Chou S, Upton H, Bao K, Schulze-Gahmen U, Samelson AJ, He N, Nowak A, Lu H, Krogan NJ, Zhou Q, Alber T. HIV-1 Tat recruits transcription elongation factors dispersed along a flexible AFF4 scaffold. Proc Natl Acad Sci U S A. 2013 Jan 8;110(2):E123-31. doi: 10.1073/pnas.1216971110. Epub 2012 Dec 18. PubMed PMID: 23251033; PubMed Central PMCID: PMC3545800.
575	PEP, 101	2013	23247501	Van Duyne R, Guendel I, Jaworski E, Sampey G, Klase Z, Chen H, Zeng C, Kovalskyy D, El Kouni MH, Lepene B, Patanarut A, Nekhai S, Price DH, Kashanchi F. Effect of mimetic CDK9 inhibitors on HIV-1-activated transcription. J Mol Biol. 2013 Feb 22;425(4):812-29. doi: 10.1016/j.jmb.2012.12.005. Epub 2012 Dec 13. PubMed PMID: 23247501; PubMed Central PMCID: PMC3595178.
576	86	2013	23218253	Fitting S, Ignatowska-Jankowska BM, Bull C, Skoff RP, Lichtman AH, Wise LE, Fox MA, Su J, Medina AE, Krahe TE, Knapp PE, Guido W, Hauser KF. Synaptic dysfunction in the hippocampus accompanies learning and memory deficits in human immunodeficiency virus type-1 Tat transgenic mice. Biol Psychiatry. 2013 Mar 1;73(5):443-53. doi: 10.1016/j.biopsych.2012.09.026. Epub 2012 Dec 4. PubMed PMID: 23218253…
577	NTU	2012	23198981	Bethel-Brown C, Yao H, Hu G, Buch S. Platelet-derived growth factor (PDGF)-BB-mediated induction of monocyte chemoattractant protein 1 in human astrocytes: implications for HIV-associated neuroinflammation. J Neuroinflammation. 2012 Dec 1;9:262. doi: 10.1186/1742-2094-9-262. PubMed PMID: 23198981; PubMed Central PMCID: PMC3526410.
578	101	2012	23190742	Marker DF, Puccini JM, Mockus TE, Barbieri J, Lu SM, Gelbard HA. LRRK2 kinase inhibition prevents pathological microglial phagocytosis in response to HIV-1 Tat protein. J Neuroinflammation. 2012 Nov 29;9:261. doi: 10.1186/1742-2094-9-261. PubMed PMID: 23190742; PubMed Central PMCID: PMC3538654.
579	LNS	2013	23180031	Hansen L, Parker I, Sutliff RL, Platt MO, Gleason RL Jr. Endothelial dysfunction, arterial stiffening, and intima-media thickening in large arteries from HIV-1 transgenic mice. Ann Biomed Eng. 2013 Apr;41(4):682-93. doi: 10.1007/s10439-012-0702-5. Epub 2012 Nov 22. PubMed PMID: 23180031; PubMed Central PMCID: PMC4487412.
580	NTU	2012	23178973	Lee SH, Ju SK, Lee TY, Huh SH, Han KH. TIP30 directly binds p53 tumor suppressor protein in vitro. Mol Cells. 2012 Nov;34(5):495-500. doi: 10.1007/s10059-012-0232-x. Epub 2012 Nov 15. PubMed PMID: 23178973; PubMed Central PMCID: PMC3887794.
581	86	2013	23178941	Tryoen-Tóth P, Chasserot-Golaz S, Tu A, Gherib P, Bader MF, Beaumelle B, Vitale N. HIV-1 Tat protein inhibits neurosecretion by binding to phosphatidylinositol 4,5-bisphosphate. J Cell Sci. 2013 Jan 15;126(Pt 2):454-63. doi: 10.1242/jcs.111658. Epub 2012 Nov 23. PubMed PMID: 23178941.
582	72, 86	2012	23167821	Silva J, Polesskaya O, Knight W, Zheng JT, Granger M, Lopez T, Ontiveros F, Feng C, Yan C, Kasischke KA, Dewhurst S. Transient hypercapnia reveals an underlying cerebrovascular pathology in a murine model for HIV-1 associated neuroinflammation: role of NO-cGMP signaling and normalization by inhibition of cyclic nucleotide phosphodiesterase-5. J Neuroinflammation. 2012 Nov 20;9:253. doi: 10.1186/1…
583	86	2012	23166591	Jarboui MA, Bidoia C, Woods E, Roe B, Wynne K, Elia G, Hall WW, Gautier VW. Nucleolar protein trafficking in response to HIV-1 Tat: rewiring the nucleolus. PLoS One. 2012;7(11):e48702. doi: 10.1371/journal.pone.0048702. Epub 2012 Nov 15. PubMed PMID: 23166591; PubMed Central PMCID: PMC3499507.
584	86	2012	23153325	Green VA, Arbuthnot P, Weinberg MS. Impact of sustained RNAi-mediated suppression of cellular cofactor Tat-SF1 on HIV-1 replication in CD4+ T cells. Virol J. 2012 Nov 15;9:272. doi: 10.1186/1743-422X-9-272. PubMed PMID: 23153325; PubMed Central PMCID: PMC3511259.
585	86	2012	23152803	Monini P, Cafaro A, Srivastava IK, Moretti S, Sharma VA, Andreini C, Chiozzini C, Ferrantelli F, Cossut MR, Tripiciano A, Nappi F, Longo O, Bellino S, Picconi O, Fanales-Belasio E, Borsetti A, Toschi E, Schiavoni I, Bacigalupo I, Kan E, Sernicola L, Maggiorella MT, Montin K, Porcu M, Leone P, Leone P, Collacchi B, Palladino C, Ridolfi B, Falchi M, Macchia I, Ulmer JB, Buttò S, Sgadari C, Magnani …
586	PEP, 72, 101	2012	23152614	Henderson LJ, Sharma A, Monaco MC, Major EO, Al-Harthi L. Human immunodeficiency virus type 1 (HIV-1) transactivator of transcription through its intact core and cysteine-rich domains inhibits Wnt/β-catenin signaling in astrocytes: relevance to HIV neuropathogenesis. J Neurosci. 2012 Nov 14;32(46):16306-13. doi: 10.1523/JNEUROSCI.3145-12.2012. PubMed PMID: 23152614; PubMed Central PMCID: PMC35087…
587	86, 101	2013	23152536	Qin A, Cai W, Pan T, Wu K, Yang Q, Wang N, Liu Y, Yan D, Hu F, Guo P, Chen X, Chen L, Zhang H, Tang X, Zhou J. Expansion of monocytic myeloid-derived suppressor cells dampens T cell function in HIV-1-seropositive individuals. J Virol. 2013 Feb;87(3):1477-90. doi: 10.1128/JVI.01759-12. Epub 2012 Nov 14. PubMed PMID: 23152536; PubMed Central PMCID: PMC3554138.
588	72, 86	2013	23152365	Wright CA, Nance JA, Johnson EM. Effects of Tat proteins and Tat mutants of different human immunodeficiency virus type 1 clades on glial JC virus early and late gene transcription. J Gen Virol. 2013 Mar;94(Pt 3):514-23. doi: 10.1099/vir.0.047902-0. Epub 2012 Nov 14. PubMed PMID: 23152365; PubMed Central PMCID: PMC3709611.
589	PEP	2012	23150670	Cooper I, Sasson K, Teichberg VI, Schnaider-Beeri M, Fridkin M, Shechter Y. Peptide derived from HIV-1 TAT protein destabilizes a monolayer of endothelial cells in an in vitro model of the blood-brain barrier and allows permeation of high molecular weight proteins. J Biol Chem. 2012 Dec 28;287(53):44676-83. doi: 10.1074/jbc.M112.395384. Epub 2012 Nov 13. PubMed PMID: 23150670; PubMed Central PMCI…
590	PEP	2013	23150610	Mueller NH, Ammar DA, Petrash JM. Cell penetration peptides for enhanced entry of αB-crystallin into lens cells. Invest Ophthalmol Vis Sci. 2013 Jan 2;54(1):2-8. doi: 10.1167/iovs.12-10947. PubMed PMID: 23150610; PubMed Central PMCID: PMC3541946.
591	86	2012	23140174	Breuer D, Kotelkin A, Ammosova T, Kumari N, Ivanov A, Ilatovskiy AV, Beullens M, Roane PR, Bollen M, Petukhov MG, Kashanchi F, Nekhai S. CDK2 regulates HIV-1 transcription by phosphorylation of CDK9 on serine 90. Retrovirology. 2012 Nov 9;9:94. doi: 10.1186/1742-4690-9-94. PubMed PMID: 23140174; PubMed Central PMCID: PMC3515335.
592	LNS	2012	23110726	Ramakrishnan R, Liu H, Donahue H, Malovannaya A, Qin J, Rice AP. Identification of novel CDK9 and Cyclin T1-associated protein complexes (CCAPs) whose siRNA depletion enhances HIV-1 Tat function. Retrovirology. 2012 Oct 30;9:90. doi: 10.1186/1742-4690-9-90. PubMed PMID: 23110726; PubMed Central PMCID: PMC3494656.
593	LNS	2012	23110705	Song H, Pavlicek JW, Cai F, Bhattacharya T, Li H, Iyer SS, Bar KJ, Decker JM, Goonetilleke N, Liu MK, Berg A, Hora B, Drinker MS, Eudailey J, Pickeral J, Moody MA, Ferrari G, McMichael A, Perelson AS, Shaw GM, Hahn BH, Haynes BF, Gao F. Impact of immune escape mutations on HIV-1 fitness in the context of the cognate transmitted/founder genome. Retrovirology. 2012 Oct 30;9:89. doi: 10.1186/1742-46…
594	LNS	2012	23103739	Zhang HS, Chen XY, Wu TC, Sang WW, Ruan Z. MiR-34a is involved in Tat-induced HIV-1 long terminal repeat (LTR) transactivation through the SIRT1/NFκB pathway. FEBS Lett. 2012 Nov 30;586(23):4203-7. doi: 10.1016/j.febslet.2012.10.023. Epub 2012 Oct 24. PubMed PMID: 23103739.
595	NTU	2012	23095869	Goldstein G, Damiano E, Donikyan M, Pasha M, Beckwith E, Chicca J. HIV-1 Tat B-cell epitope vaccination was ineffectual in preventing viral rebound after ART cessation: HIV rebound with current ART appears to be due to infection with new endogenous founder virus and not to resurgence of pre-existing Tat-dependent viremia. Hum Vaccin Immunother. 2012 Oct;8(10):1425-30. doi: 10.4161/hv.21616. Epub …
596	NTU	2013	23088399	Liu Y, Timani K, Ou X, Broxmeyer HE, He JJ. C-MYC controlled TIP110 protein expression regulates OCT4 mRNA splicing in human embryonic stem cells. Stem Cells Dev. 2013 Mar 1;22(5):689-94. doi: 10.1089/scd.2012.0271. Epub 2012 Dec 12. PubMed PMID: 23088399; PubMed Central PMCID: PMC3578368.
597	LNS	2012	23041316	Zhu J, Gaiha GD, John SP, Pertel T, Chin CR, Gao G, Qu H, Walker BD, Elledge SJ, Brass AL. Reactivation of latent HIV-1 by inhibition of BRD4. Cell Rep. 2012 Oct 25;2(4):807-16. doi: 10.1016/j.celrep.2012.09.008. Epub 2012 Oct 4. PubMed PMID: 23041316; PubMed Central PMCID: PMC3523124.
598	NTU	2012	23029603	Upert G, Di Giorgio A, Upadhyay A, Manvar D, Pandey N, Pandey VN, Patino N. Inhibition of HIV Replication by Cyclic and Hairpin PNAs Targeting the HIV-1 TAR RNA Loop. J Nucleic Acids. 2012;2012:591025. doi: 10.1155/2012/591025. Epub 2012 Sep 17. PubMed PMID: 23029603; PubMed Central PMCID: PMC3457641.
599	NTU	2012	22993180	Gall A, Ferns B, Morris C, Watson S, Cotten M, Robinson M, Berry N, Pillay D, Kellam P. Universal amplification, next-generation sequencing, and assembly of HIV-1 genomes. J Clin Microbiol. 2012 Dec;50(12):3838-44. doi: 10.1128/JCM.01516-12. Epub 2012 Sep 19. PubMed PMID: 22993180; PubMed Central PMCID: PMC3502977.
600	PEP, 86	2012	22937208	Jin J, Lam L, Sadic E, Fernandez F, Tan J, Giunta B. HIV-1 Tat-induced microglial activation and neuronal damage is inhibited via CD45 modulation: A potential new treatment target for HAND. Am J Transl Res. 2012;4(3):302-15. Epub 2012 Jul 22. PubMed PMID: 22937208; PubMed Central PMCID: PMC3426392.
601	86, 101	2012	22933282	Alpert MD, Heyer LN, Williams DE, Harvey JD, Greenough T, Allhorn M, Evans DT. A novel assay for antibody-dependent cell-mediated cytotoxicity against HIV-1- or SIV-infected cells reveals incomplete overlap with antibodies measured by neutralization and binding assays. J Virol. 2012 Nov;86(22):12039-52. doi: 10.1128/JVI.01650-12. Epub 2012 Aug 29. PubMed PMID: 22933282; PubMed Central PMCID: PMC3…
602	72	2012	22932723	Hu G, Yao H, Chaudhuri AD, Duan M, Yelamanchili SV, Wen H, Cheney PD, Fox HS, Buch S. Exosome-mediated shuttling of microRNA-29 regulates HIV Tat and morphine-mediated neuronal dysfunction. Cell Death Dis. 2012 Aug 30;3:e381. doi: 10.1038/cddis.2012.114. PubMed PMID: 22932723; PubMed Central PMCID: PMC3434655.
603	LNS	2013	22924643	Gray LR, Cowley D, Crespan E, Welsh C, Mackenzie C, Wesselingh SL, Gorry PR, Churchill MJ. Reduced basal transcriptional activity of central nervous system-derived HIV type 1 long terminal repeats. AIDS Res Hum Retroviruses. 2013 Feb;29(2):365-70. doi: 10.1089/AID.2012.0138. Epub 2012 Sep 25. PubMed PMID: 22924643; PubMed Central PMCID: PMC3552182.
604	NTU	2012	22899925	Li L, Dahiya S, Kortagere S, Aiamkitsumrit B, Cunningham D, Pirrone V, Nonnemacher MR, Wigdahl B. Impact of Tat Genetic Variation on HIV-1 Disease. Adv Virol. 2012;2012:123605. doi: 10.1155/2012/123605. Epub 2012 Jul 30. PubMed PMID: 22899925; PubMed Central PMCID: PMC3414192.
605	PEP	2012	22885154	Ozaki T, Nakazawa M, Yamashita T, Sorimachi H, Hata S, Tomita H, Isago H, Baba A, Ishiguro S. Intravitreal injection or topical eye-drop application of a μ-calpain C2L domain peptide protects against photoreceptor cell death in Royal College of Surgeons' rats, a model of retinitis pigmentosa. Biochim Biophys Acta. 2012 Nov;1822(11):1783-95. doi: 10.1016/j.bbadis.2012.07.018. Epub 2012 Aug 3. PubM…
606	86	2012	22865725	Hahn YK, Podhaizer EM, Hauser KF, Knapp PE. HIV-1 alters neural and glial progenitor cell dynamics in the central nervous system: coordinated response to opiates during maturation. Glia. 2012 Dec;60(12):1871-87. doi: 10.1002/glia.22403. Epub 2012 Aug 2. PubMed PMID: 22865725; PubMed Central PMCID: PMC4030306.
607	LNS	2012	22858844	Olmedo D, Sancho R, Bedoya LM, López-Pérez JL, Del Olmo E, Muñoz E, Alcamí J, Gupta MP, San Feliciano A. 3-Phenylcoumarins as inhibitors of HIV-1 replication. Molecules. 2012 Aug 2;17(8):9245-57. doi: 10.3390/molecules17089245. PubMed PMID: 22858844; PubMed Central PMCID: PMC6268528.
608	PEP	2012	22845840	Sun W, Fletcher D, van Heeckeren RC, Davis PB. Non-covalent ligand conjugation to biotinylated DNA nanoparticles using TAT peptide genetically fused to monovalent streptavidin. J Drug Target. 2012 Sep;20(8):678-90. doi: 10.3109/1061186X.2012.712128. PubMed PMID: 22845840; PubMed Central PMCID: PMC4143894.
609	86	2012	22834872	Chung J, Zhang J, Li H, Ouellet DL, DiGiusto DL, Rossi JJ. Endogenous MCM7 microRNA cluster as a novel platform to multiplex small interfering and nucleolar RNAs for combinational HIV-1 gene therapy. Hum Gene Ther. 2012 Nov;23(11):1200-8. doi: 10.1089/hum.2012.011. Epub 2012 Sep 18. PubMed PMID: 22834872; PubMed Central PMCID: PMC3498885.
610	LNS	2012	22828409	Wayman WN, Dodiya HB, Persons AL, Kashanchi F, Kordower JH, Hu XT, Napier TC. Enduring cortical alterations after a single in-vivo treatment of HIV-1 Tat. Neuroreport. 2012 Oct 3;23(14):825-9. doi: 10.1097/WNR.0b013e3283578050. PubMed PMID: 22828409; PubMed Central PMCID: PMC3555038.
611	NTU	2012	22828074	Das AT, Vrolijk MM, Harwig A, Berkhout B. Opening of the TAR hairpin in the HIV-1 genome causes aberrant RNA dimerization and packaging. Retrovirology. 2012 Jul 24;9:59. doi: 10.1186/1742-4690-9-59. PubMed PMID: 22828074; PubMed Central PMCID: PMC3432602.
612	LNS	2013	22823339	Sarkar S, Mao X, Liu C, Chang SL. Age- and ethanol concentration-dependent effects of acute binge drinking in the HIV-1 transgenic rat. Alcohol Clin Exp Res. 2013 Jan;37 Suppl 1:E70-8. doi: 10.1111/j.1530-0277.2012.01860.x. Epub 2012 Jul 23. PubMed PMID: 22823339; PubMed Central PMCID: PMC3482305.
613	PEP, 86, 101	2012	22817991	Mousseau G, Clementz MA, Bakeman WN, Nagarsheth N, Cameron M, Shi J, Baran P, Fromentin R, Chomont N, Valente ST. An analog of the natural steroidal alkaloid cortistatin A potently suppresses Tat-dependent HIV transcription. Cell Host Microbe. 2012 Jul 19;12(1):97-108. doi: 10.1016/j.chom.2012.05.016. PubMed PMID: 22817991; PubMed Central PMCID: PMC3403716.
614	86	2012	22815507	Dutta R, Krishnan A, Meng J, Das S, Ma J, Banerjee S, Wang J, Charboneau R, Prakash O, Barke RA, Roy S. Morphine modulation of toll-like receptors in microglial cells potentiates neuropathogenesis in a HIV-1 model of coinfection with pneumococcal pneumoniae. J Neurosci. 2012 Jul 18;32(29):9917-30. doi: 10.1523/JNEUROSCI.0870-12.2012. PubMed PMID: 22815507; PubMed Central PMCID: PMC3417042.
615	LNS	2012	22807676	Roesch F, Meziane O, Kula A, Nisole S, Porrot F, Anderson I, Mammano F, Fassati A, Marcello A, Benkirane M, Schwartz O. Hyperthermia stimulates HIV-1 replication. PLoS Pathog. 2012;8(7):e1002792. doi: 10.1371/journal.ppat.1002792. Epub 2012 Jul 12. PubMed PMID: 22807676; PubMed Central PMCID: PMC3395604.
616	86	2012	22807456	Li M, Aliotta JM, Asara JM, Tucker L, Quesenberry P, Lally M, Ramratnam B. Quantitative proteomic analysis of exosomes from HIV-1-infected lymphocytic cells. Proteomics. 2012 Jul;12(13):2203-11. doi: 10.1002/pmic.201100376. PubMed PMID: 22807456; PubMed Central PMCID: PMC3815571.
617	LNS	2012	22802445	Banerjee C, Archin N, Michaels D, Belkina AC, Denis GV, Bradner J, Sebastiani P, Margolis DM, Montano M. BET bromodomain inhibition as a novel strategy for reactivation of HIV-1. J Leukoc Biol. 2012 Dec;92(6):1147-54. doi: 10.1189/jlb.0312165. Epub 2012 Jul 16. PubMed PMID: 22802445; PubMed Central PMCID: PMC3501896.
618	PEP	2012	22792193	Buggert M, Norström MM, Czarnecki C, Tupin E, Luo M, Gyllensten K, Sönnerborg A, Lundegaard C, Lund O, Nielsen M, Karlsson AC. Characterization of HIV-specific CD4+ T cell responses against peptides selected with broad population and pathogen coverage. PLoS One. 2012;7(7):e39874. doi: 10.1371/journal.pone.0039874. Epub 2012 Jul 5. PubMed PMID: 22792193; PubMed Central PMCID: PMC3390319.
619	PEP	2012	22790219	Ohshima K, Takeda S, Hirose M, Akiyama Y, Iguchi K, Hoshino M, Yamaguchi K, Mochizuki T. Structure-function relationship of the nuclear localization signal sequence of parathyroid hormone-related protein. Biomed Res. 2012 Jun;33(3):191-9. PubMed PMID: 22790219.
620	86	2012	22787205	Reynoso R, Wieser M, Ojeda D, Bönisch M, Kühnel H, Bolcic F, Quendler H, Grillari J, Grillari-Voglauer R, Quarleri J. HIV-1 induces telomerase activity in monocyte-derived macrophages, possibly safeguarding one of its reservoirs. J Virol. 2012 Oct;86(19):10327-37. doi: 10.1128/JVI.01495-12. Epub 2012 Jul 11. PubMed PMID: 22787205; PubMed Central PMCID: PMC3457250.
621	LNS	2012	22771113	Narayanan A, Sampey G, Van Duyne R, Guendel I, Kehn-Hall K, Roman J, Currer R, Galons H, Oumata N, Joseph B, Meijer L, Caputi M, Nekhai S, Kashanchi F. Use of ATP analogs to inhibit HIV-1 transcription. Virology. 2012 Oct 10;432(1):219-31. doi: 10.1016/j.virol.2012.06.007. Epub 2012 Jul 6. PubMed PMID: 22771113; PubMed Central PMCID: PMC3431923.
622	PEP, 86	2012	22768081	Ammosova T, Platonov M, Yedavalli VR, Obukhov Y, Gordeuk VR, Jeang KT, Kovalskyy D, Nekhai S. Small molecules targeted to a non-catalytic ""RVxF"" binding site of protein phosphatase-1 inhibit HIV-1. PLoS One. 2012;7(6):e39481. doi: 10.1371/journal.pone.0039481. Epub 2012 Jun 29. PubMed PMID: 22768081; PubMed Central PMCID: PMC3387161.
623	NTU	2012	22734618	Braun SE, Taube R, Zhu Q, Wong FE, Murakami A, Kamau E, Dwyer M, Qiu G, Daigle J, Carville A, Johnson RP, Marasco WA. In vivo selection of CD4(+) T cells transduced with a gamma-retroviral vector expressing a single-chain intrabody targeting HIV-1 tat. Hum Gene Ther. 2012 Sep;23(9):917-31. doi: 10.1089/hum.2011.184. PubMed PMID: 22734618; PubMed Central PMCID: PMC3440024.
624	NTU	2013	22733137	Li A, Zhang C, Gao S, Chen F, Yang C, Luo R, Xiao H. TIP30 loss enhances cytoplasmic and nuclear EGFR signaling and promotes lung adenocarcinogenesis in mice. Oncogene. 2013 May 2;32(18):2273-81, 2281e.1-12. doi: 10.1038/onc.2012.253. Epub 2012 Jun 25. PubMed PMID: 22733137; PubMed Central PMCID: PMC3460142.
625	86	2012	22727189	Budhiraja S, Ramakrishnan R, Rice AP. Phosphatase PPM1A negatively regulates P-TEFb function in resting CD4(+) T cells and inhibits HIV-1 gene expression. Retrovirology. 2012 Jun 22;9:52. doi: 10.1186/1742-4690-9-52. PubMed PMID: 22727189; PubMed Central PMCID: PMC3406988.
626	101	2012	22709905	Mishra R, Chhatbar C, Singh SK. HIV-1 Tat C-mediated regulation of tumor necrosis factor receptor-associated factor-3 by microRNA 32 in human microglia. J Neuroinflammation. 2012 Jun 18;9:131. doi: 10.1186/1742-2094-9-131. PubMed PMID: 22709905; PubMed Central PMCID: PMC3418571.
627	LNS	2012	22698070	Das I, Désiré J, Manvar D, Baussanne I, Pandey VN, Décout JL. A peptide nucleic acid-aminosugar conjugate targeting transactivation response element of HIV-1 RNA genome shows a high bioavailability in human cells and strongly inhibits tat-mediated transactivation of HIV-1 transcription. J Med Chem. 2012 Jul 12;55(13):6021-32. doi: 10.1021/jm300253q. Epub 2012 Jun 22. PubMed PMID: 22698070; PubMed…
628	86	2012	22696642	Permanyer M, Ballana E, Ruiz A, Badia R, Riveira-Munoz E, Gonzalo E, Clotet B, Esté JA. Antiretroviral agents effectively block HIV replication after cell-to-cell transfer. J Virol. 2012 Aug;86(16):8773-80. doi: 10.1128/JVI.01044-12. Epub 2012 Jun 13. PubMed PMID: 22696642; PubMed Central PMCID: PMC3421720.
629	LNS	2012	22674979	Henderson LJ, Narasipura SD, Adarichev V, Kashanchi F, Al-Harthi L. Identification of novel T cell factor 4 (TCF-4) binding sites on the HIV long terminal repeat which associate with TCF-4, β-catenin, and SMAR1 to repress HIV transcription. J Virol. 2012 Sep;86(17):9495-503. doi: 10.1128/JVI.00486-12. Epub 2012 Jun 6. PubMed PMID: 22674979; PubMed Central PMCID: PMC3416155.
630	NTU	2012	22664962	Li M, Husic N, Lin Y, Snider BJ. Production of lentiviral vectors for transducing cells from the central nervous system. J Vis Exp. 2012 May 24;(63):e4031. doi: 10.3791/4031. PubMed PMID: 22664962; PubMed Central PMCID: PMC3466950.
631	86	2012	22659585	Fitting S, Scoggins KL, Xu R, Dever SM, Knapp PE, Dewey WL, Hauser KF. Morphine efficacy is altered in conditional HIV-1 Tat transgenic mice. Eur J Pharmacol. 2012 Aug 15;689(1-3):96-103. doi: 10.1016/j.ejphar.2012.05.029. Epub 2012 May 30. PubMed PMID: 22659585; PubMed Central PMCID: PMC3402587.
632	86	2012	22647372	Legrand N, van der Velden GJ, Ho Tsong Fang R, Douaisi M, Weijer K, Das AT, Blom B, Uittenbogaart CH, Berkhout B, Centlivre M. A doxycycline-dependent human immunodeficiency virus type 1 replicates in vivo without inducing CD4+ T-cell depletion. J Gen Virol. 2012 Sep;93(Pt 9):2017-27. doi: 10.1099/vir.0.042796-0. Epub 2012 May 30. PubMed PMID: 22647372; PubMed Central PMCID: PMC3542129.
633	86	2012	22629415	Adams SM, Aksenova MV, Aksenov MY, Mactutus CF, Booze RM. Soy isoflavones genistein and daidzein exert anti-apoptotic actions via a selective ER-mediated mechanism in neurons following HIV-1 Tat(1-86) exposure. PLoS One. 2012;7(5):e37540. doi: 10.1371/journal.pone.0037540. Epub 2012 May 22. PubMed PMID: 22629415; PubMed Central PMCID: PMC3358258.
634	LNS	2012	22618514	Wires ES, Alvarez D, Dobrowolski C, Wang Y, Morales M, Karn J, Harvey BK. Methamphetamine activates nuclear factor kappa-light-chain-enhancer of activated B cells (NF-κB) and induces human immunodeficiency virus (HIV) transcription in human microglial cells. J Neurovirol. 2012 Oct;18(5):400-10. doi: 10.1007/s13365-012-0103-4. Epub 2012 May 22. PubMed PMID: 22618514; PubMed Central PMCID: PMC34697…
635	72, 86, 101	2012	22593154	Gonzalez-Hernandez MJ, Swanson MD, Contreras-Galindo R, Cookinham S, King SR, Noel RJ Jr, Kaplan MH, Markovitz DM. Expression of human endogenous retrovirus type K (HML-2) is activated by the Tat protein of HIV-1. J Virol. 2012 Aug;86(15):7790-805. doi: 10.1128/JVI.07215-11. Epub 2012 May 16. PubMed PMID: 22593154; PubMed Central PMCID: PMC3421662.
636	PEP, 72	2012	22591512	Hui L, Chen X, Haughey NJ, Geiger JD. Role of endolysosomes in HIV-1 Tat-induced neurotoxicity. ASN Neuro. 2012 Jun 20;4(4):243-52. doi: 10.1042/AN20120017. PubMed PMID: 22591512; PubMed Central PMCID: PMC3379000.
637	NTU	2012	22590503	Rossenkhan R, Novitsky V, Sebunya TK, Musonda R, Gashe BA, Essex M. Viral diversity and diversification of major non-structural genes vif, vpr, vpu, tat exon 1 and rev exon 1 during primary HIV-1 subtype C infection. PLoS One. 2012;7(5):e35491. doi: 10.1371/journal.pone.0035491. Epub 2012 May 9. PubMed PMID: 22590503; PubMed Central PMCID: PMC3348911.
638	PEP	2012	22590502	Lisziewicz J, Bakare N, Calarota SA, Bánhegyi D, Szlávik J, Ujhelyi E, Tőke ER, Molnár L, Lisziewicz Z, Autran B, Lori F. Single DermaVir immunization: dose-dependent expansion of precursor/memory T cells against all HIV antigens in HIV-1 infected individuals. PLoS One. 2012;7(5):e35416. doi: 10.1371/journal.pone.0035416. Epub 2012 May 9. PubMed PMID: 22590502; PubMed Central PMCID: PMC3348904.
639	86	2012	22570010	Midde NM, Gomez AM, Zhu J. HIV-1 Tat protein decreases dopamine transporter cell surface expression and vesicular monoamine transporter-2 function in rat striatal synaptosomes. J Neuroimmune Pharmacol. 2012 Sep;7(3):629-39. doi: 10.1007/s11481-012-9369-9. Epub 2012 May 5. PubMed PMID: 22570010; PubMed Central PMCID: PMC3688268.
640	PEP	2012	22553998	Sallum CO, Wilson JL, Rupasinghe C, Berg E, Yu J, Green DS, Taylor L, Mierke D, Polgar P. Enhancing and limiting endothelin-1 signaling with a cell-penetrating peptide mimicking the third intracellular loop of the ETB receptor. Chem Biol Drug Des. 2012 Sep;80(3):374-81. doi: 10.1111/j.1747-0285.2012.01405.x. Epub 2012 Jun 27. PubMed PMID: 22553998; PubMed Central PMCID: PMC3496424.
641	86	2012	22552781	Aksenov MY, Aksenova MV, Mactutus CF, Booze RM. D1/NMDA receptors and concurrent methamphetamine+ HIV-1 Tat neurotoxicity. J Neuroimmune Pharmacol. 2012 Sep;7(3):599-608. doi: 10.1007/s11481-012-9362-3. Epub 2012 May 3. PubMed PMID: 22552781; PubMed Central PMCID: PMC4041990.
642	86	2012	22528484	Chiodelli P, Urbinati C, Mitola S, Tanghetti E, Rusnati M. Sialic acid associated with αvβ3 integrin mediates HIV-1 Tat protein interaction and endothelial cell proangiogenic activation. J Biol Chem. 2012 Jun 8;287(24):20456-66. doi: 10.1074/jbc.M111.337139. Epub 2012 Apr 23. PubMed PMID: 22528484; PubMed Central PMCID: PMC3370225.
643	NTU	2012	22528397	Choi JY, Hightower GK, Wong JK, Heaton R, Woods S, Grant I, Marcotte TD, Ellis RJ, Letendre SL, Collier AC, Marra CM, Clifford DB, Gelman BB, McArthur JC, Morgello S, Simpson DM, McCutchan JA, Richman DD, Smith DM; Charter Group. Genetic features of cerebrospinal fluid-derived subtype B HIV-1 tat. J Neurovirol. 2012 Apr;18(2):81-90. doi: 10.1007/s13365-011-0059-9. Epub 2012 Apr 13. PubMed PMID: 2…
644	PEP, 72	2012	22524563	Hui L, Chen X, Bhatt D, Geiger NH, Rosenberger TA, Haughey NJ, Masino SA, Geiger JD. Ketone bodies protection against HIV-1 Tat-induced neurotoxicity. J Neurochem. 2012 Jul;122(2):382-91. doi: 10.1111/j.1471-4159.2012.07764.x. Epub 2012 May 17. PubMed PMID: 22524563; PubMed Central PMCID: PMC3419790.
645	72	2012	22517264	Theodore S, Cass WA, Dwoskin LP, Maragos WF. HIV-1 protein Tat inhibits vesicular monoamine transporter-2 activity in rat striatum. Synapse. 2012 Aug;66(8):755-7. doi: 10.1002/syn.21564. Epub 2012 May 23. PubMed PMID: 22517264; PubMed Central PMCID: PMC4548822.
646	NTU	2012	22511868	Vassena L, Miao H, Cimbro R, Malnati MS, Cassina G, Proschan MA, Hirsch VM, Lafont BA, Morre M, Fauci AS, Lusso P. Treatment with IL-7 prevents the decline of circulating CD4+ T cells during the acute phase of SIV infection in rhesus macaques. PLoS Pathog. 2012;8(4):e1002636. doi: 10.1371/journal.ppat.1002636. Epub 2012 Apr 12. PubMed PMID: 22511868; PubMed Central PMCID: PMC3325214.
647	LNS	2012	22503372	Royal W 3rd, Zhang L, Guo M, Jones O, Davis H, Bryant JL. Immune activation, viral gene product expression and neurotoxicity in the HIV-1 transgenic rat. J Neuroimmunol. 2012 Jun 15;247(1-2):16-24. doi: 10.1016/j.jneuroim.2012.03.015. Epub 2012 Apr 12. PubMed PMID: 22503372; PubMed Central PMCID: PMC3351529.
648	101	2012	22471703	Qu J, Zhang Q, Li Y, Liu W, Chen L, Zhu Y, Wu J. The Tat protein of human immunodeficiency virus-1 enhances hepatitis C virus replication through interferon gamma-inducible protein-10. BMC Immunol. 2012 Apr 3;13:15. doi: 10.1186/1471-2172-13-15. PubMed PMID: 22471703; PubMed Central PMCID: PMC3350415.
649	86	2012	22463742	Green LA, Kim C, Gupta SK, Rajashekhar G, Rehman J, Clauss M. Pentoxifylline reduces tumor necrosis factor-α and HIV-induced vascular endothelial activation. AIDS Res Hum Retroviruses. 2012 Oct;28(10):1207-15. Epub 2012 May 8. PubMed PMID: 22463742; PubMed Central PMCID: PMC3448099.
650	PEP	2012	22461689	Frahm MA, Picking RA, Kuruc JD, McGee KS, Gay CL, Eron JJ, Hicks CB, Tomaras GD, Ferrari G. CD4+CD8+ T cells represent a significant portion of the anti-HIV T cell response to acute HIV infection. J Immunol. 2012 May 1;188(9):4289-96. doi: 10.4049/jimmunol.1103701. Epub 2012 Mar 28. PubMed PMID: 22461689; PubMed Central PMCID: PMC3692005.
651	86	2012	22450687	Ju SM, Goh AR, Kwon DJ, Youn GS, Kwon HJ, Bae YS, Choi SY, Park J. Extracellular HIV-1 Tat induces human beta-defensin-2 production via NF-kappaB/AP-1 dependent pathways in human B cells. Mol Cells. 2012 Apr;33(4):335-41. doi: 10.1007/s10059-012-2287-0. Epub 2012 Mar 23. PubMed PMID: 22450687; PubMed Central PMCID: PMC3887796.
652	PEP, 72, 86, 101	2012	22447980	Li GH, Li W, Mumper RJ, Nath A. Molecular mechanisms in the dramatic enhancement of HIV-1 Tat transduction by cationic liposomes. FASEB J. 2012 Jul;26(7):2824-34. doi: 10.1096/fj.11-203315. Epub 2012 Mar 23. PubMed PMID: 22447980; PubMed Central PMCID: PMC3382090.
653	NTU	2012	22422068	Dahiya S, Nonnemacher MR, Wigdahl B. Deployment of the human immunodeficiency virus type 1 protein arsenal: combating the host to enhance viral transcription and providing targets for therapeutic development. J Gen Virol. 2012 Jun;93(Pt 6):1151-72. doi: 10.1099/vir.0.041186-0. Epub 2012 Mar 14. PubMed PMID: 22422068; PubMed Central PMCID: PMC3755519.
654	PEP, 86	2012	22419111	Lecoeur H, Borgne-Sanchez A, Chaloin O, El-Khoury R, Brabant M, Langonné A, Porceddu M, Brière JJ, Buron N, Rebouillat D, Péchoux C, Deniaud A, Brenner C, Briand JP, Muller S, Rustin P, Jacotot E. HIV-1 Tat protein directly induces mitochondrial membrane permeabilization and inactivates cytochrome c oxidase. Cell Death Dis. 2012 Mar 15;3:e282. doi: 10.1038/cddis.2012.21. PubMed PMID: 22419111; Pu…
655	LNS	2012	22412921	Lodge R, Ouellet M, Barat C, Andreani G, Kumar P, Tremblay MJ. HIV-1 promotes intake of Leishmania parasites by enhancing phosphatidylserine-mediated, CD91/LRP-1-dependent phagocytosis in human macrophages. PLoS One. 2012;7(3):e32761. doi: 10.1371/journal.pone.0032761. Epub 2012 Mar 6. PubMed PMID: 22412921; PubMed Central PMCID: PMC3295765.
656	86	2012	22407921	Chihara T, Hashimoto M, Osman A, Hiyoshi-Yoshidomi Y, Suzu I, Chutiwitoonchai N, Hiyoshi M, Okada S, Suzu S. HIV-1 proteins preferentially activate anti-inflammatory M2-type macrophages. J Immunol. 2012 Apr 15;188(8):3620-7. doi: 10.4049/jimmunol.1101593. Epub 2012 Mar 9. PubMed PMID: 22407921.
657	LNS	2012	22406815	Zhang HS, Wu TC, Sang WW, Ruan Z. MiR-217 is involved in Tat-induced HIV-1 long terminal repeat (LTR) transactivation by down-regulation of SIRT1. Biochim Biophys Acta. 2012 May;1823(5):1017-23. doi: 10.1016/j.bbamcr.2012.02.014. Epub 2012 Mar 3. PubMed PMID: 22406815.
658	86, 101	2012	22404213	Dziuba N, Ferguson MR, O'Brien WA, Sanchez A, Prussia AJ, McDonald NJ, Friedrich BM, Li G, Shaw MW, Sheng J, Hodge TW, Rubin DH, Murray JL. Identification of cellular proteins required for replication of human immunodeficiency virus type 1. AIDS Res Hum Retroviruses. 2012 Oct;28(10):1329-39. Epub 2012 Apr 20. PubMed PMID: 22404213; PubMed Central PMCID: PMC3448097.
659	PEP	2012	22389453	Kawabata A, Baoum A, Ohta N, Jacquez S, Seo GM, Berkland C, Tamura M. Intratracheal administration of a nanoparticle-based therapy with the angiotensin II type 2 receptor gene attenuates lung cancer growth. Cancer Res. 2012 Apr 15;72(8):2057-67. doi: 10.1158/0008-5472.CAN-11-3634. Epub 2012 Mar 2. PubMed PMID: 22389453; PubMed Central PMCID: PMC3566878.
660	NTU	2012	22379092	Shamay M, Liu J, Li R, Liao G, Shen L, Greenway M, Hu S, Zhu J, Xie Z, Ambinder RF, Qian J, Zhu H, Hayward SD. A protein array screen for Kaposi's sarcoma-associated herpesvirus LANA interactors links LANA to TIP60, PP2A activity, and telomere shortening. J Virol. 2012 May;86(9):5179-91. doi: 10.1128/JVI.00169-12. Epub 2012 Feb 29. PubMed PMID: 22379092; PubMed Central PMCID: PMC3347335.
661	PEP, 101	2012	22362765	Mediouni S, Watkins JD, Pierres M, Bole A, Loret EP, Baillat G. A monoclonal antibody directed against a conformational epitope of the HIV-1 trans-activator (Tat) protein neutralizes cross-clade. J Biol Chem. 2012 Apr 6;287(15):11942-50. doi: 10.1074/jbc.M111.319863. Epub 2012 Feb 23. PubMed PMID: 22362765; PubMed Central PMCID: PMC3320942.
662	PEP	2012	22348110	Mariyanna L, Priyadarshini P, Hofmann-Sieber H, Krepstakies M, Walz N, Grundhoff A, Buchholz F, Hildt E, Hauber J. Excision of HIV-1 proviral DNA by recombinant cell permeable tre-recombinase. PLoS One. 2012;7(2):e31576. doi: 10.1371/journal.pone.0031576. Epub 2012 Feb 13. PubMed PMID: 22348110; PubMed Central PMCID: PMC3278460.
663	101	2012	22347501	Tang Q, Qin D, Lv Z, Zhu X, Ma X, Yan Q, Zeng Y, Guo Y, Feng N, Lu C. Herpes simplex virus type 2 triggers reactivation of Kaposi's sarcoma-associated herpesvirus from latency and collaborates with HIV-1 Tat. PLoS One. 2012;7(2):e31652. doi: 10.1371/journal.pone.0031652. Epub 2012 Feb 9. PubMed PMID: 22347501; PubMed Central PMCID: PMC3276581.
664	86, 101	2012	22342181	Kuzmina A, Hadad U, Fujinaga K, Taube R. Functional characterization of a human cyclin T1 mutant reveals a different binding surface for Tat and HEXIM1. Virology. 2012 May 10;426(2):152-61. doi: 10.1016/j.virol.2012.01.033. Epub 2012 Feb 18. PubMed PMID: 22342181.
665	PEP	2012	22339203	Kumar S, Kellish P, Robinson WE Jr, Wang D, Appella DH, Arya DP. Click dimers to target HIV TAR RNA conformation. Biochemistry. 2012 Mar 20;51(11):2331-47. doi: 10.1021/bi201657k. Epub 2012 Mar 9. Erratum in: Biochemistry. 2013 Oct 8;52(40):7159. PubMed PMID: 22339203; PubMed Central PMCID: PMC3673543.
666	PEP	2012	22319541	Keogan S, Passic S, Krebs FC. Infection by CXCR4-Tropic Human Immunodeficiency Virus Type 1 Is Inhibited by the Cationic Cell-Penetrating Peptide Derived from HIV-1 Tat. Int J Pept. 2012;2012:349427. doi: 10.1155/2012/349427. Epub 2012 Jan 29. PubMed PMID: 22319541; PubMed Central PMCID: PMC3272803.
667	101	2012	22316138	Nakamura M, Basavarajaiah P, Rousset E, Beraud C, Latreille D, Henaoui IS, Lassot I, Mari B, Kiernan R. Spt6 levels are modulated by PAAF1 and proteasome to regulate the HIV-1 LTR. Retrovirology. 2012 Feb 8;9:13. doi: 10.1186/1742-4690-9-13. PubMed PMID: 22316138; PubMed Central PMCID: PMC3305501.
668	PEP	2012	22309233	Pan Y, Zhang Y, Jia T, Zhang K, Li J, Wang L. Development of a microRNA delivery system based on bacteriophage MS2 virus-like particles. FEBS J. 2012 Apr;279(7):1198-208. doi: 10.1111/j.1742-4658.2012.08512.x. Epub 2012 Feb 23. PubMed PMID: 22309233.
669	86	2012	22286970	Charbonneau J, Gendron K, Ferbeyre G, Brakier-Gingras L. The 5' UTR of HIV-1 full-length mRNA and the Tat viral protein modulate the programmed -1 ribosomal frameshift that generates HIV-1 enzymes. RNA. 2012 Mar;18(3):519-29. doi: 10.1261/rna.030346.111. Epub 2012 Jan 27. PubMed PMID: 22286970; PubMed Central PMCID: PMC3285939.
670	PEP	2012	22253435	Dey SS, Xue Y, Joachimiak MP, Friedland GD, Burnett JC, Zhou Q, Arkin AP, Schaffer DV. Mutual information analysis reveals coevolving residues in Tat that compensate for two distinct functions in HIV-1 gene expression. J Biol Chem. 2012 Mar 9;287(11):7945-55. doi: 10.1074/jbc.M111.302653. Epub 2012 Jan 17. PubMed PMID: 22253435; PubMed Central PMCID: PMC3318752.
671	86	2012	22238306	Donahue DA, Kuhl BD, Sloan RD, Wainberg MA. The viral protein Tat can inhibit the establishment of HIV-1 latency. J Virol. 2012 Mar;86(6):3253-63. doi: 10.1128/JVI.06648-11. Epub 2012 Jan 11. PubMed PMID: 22238306; PubMed Central PMCID: PMC3302319.
672	NTU	2012	22236201	Neogi U, Gupta S, Sahoo PN, Shet A, Rao SD, Ranga U, Prasad VR. Genetic characterization of HIV type 1 Tat exon 1 from a southern Indian clinical cohort: identification of unique epidemiological signature residues. AIDS Res Hum Retroviruses. 2012 Sep;28(9):1152-6. doi: 10.1089/AID.2011.0380. Epub 2012 May 2. PubMed PMID: 22236201; PubMed Central PMCID: PMC3423656.
673	86	2012	22219277	Zhong Y, Zhang B, Eum SY, Toborek M. HIV-1 Tat triggers nuclear localization of ZO-1 via Rho signaling and cAMP response element-binding protein activation. J Neurosci. 2012 Jan 4;32(1):143-50. doi: 10.1523/JNEUROSCI.4266-11.2012. PubMed PMID: 22219277; PubMed Central PMCID: PMC3566645.
674	LNS	2011	22216281	Buccigrossi V, Laudiero G, Nicastro E, Miele E, Esposito F, Guarino A. The HIV-1 transactivator factor (Tat) induces enterocyte apoptosis through a redox-mediated mechanism. PLoS One. 2011;6(12):e29436. doi: 10.1371/journal.pone.0029436. Epub 2011 Dec 27. PubMed PMID: 22216281; PubMed Central PMCID: PMC3246489.
675	PEP, 86	2012	24832227	Quy VC, Pantano S, Rossetti G, Giacca M, Carloni P. HIV-1 Tat Binding to PCAF Bromodomain: Structural Determinants from Computational Methods. Biology (Basel). 2012 Aug 13;1(2):277-96. doi: 10.3390/biology1020277. PubMed PMID: 24832227; PubMed Central PMCID: PMC4009784.
676	LNS	2012	24832221	Kula A, Marcello A. Dynamic Post-Transcriptional Regulation of HIV-1 Gene Expression. Biology (Basel). 2012 Jul 3;1(2):116-33. doi: 10.3390/biology1020116. PubMed PMID: 24832221; PubMed Central PMCID: PMC4009772.
677	NTU	2012	24832049	Ramakrishnan R, Chiang K, Liu H, Budhiraja S, Donahue H, Rice AP. Making a Short Story Long: Regulation of P-TEFb and HIV-1 Transcriptional Elongation in CD4+ T Lymphocytes and Macrophages. Biology (Basel). 2012 Jun 15;1(1):94-115. doi: 10.3390/biology1010094. PubMed PMID: 24832049; PubMed Central PMCID: PMC4011037.
678	86	2012	22205749	Chiang K, Sung TL, Rice AP. Regulation of cyclin T1 and HIV-1 Replication by microRNAs in resting CD4+ T lymphocytes. J Virol. 2012 Mar;86(6):3244-52. doi: 10.1128/JVI.05065-11. Epub 2011 Dec 28. PubMed PMID: 22205749; PubMed Central PMCID: PMC3302325.
679	86	2012	22197678	Carey AN, Sypek EI, Singh HD, Kaufman MJ, McLaughlin JP. Expression of HIV-Tat protein is associated with learning and memory deficits in the mouse. Behav Brain Res. 2012 Apr 1;229(1):48-56. doi: 10.1016/j.bbr.2011.12.019. Epub 2011 Dec 20. PubMed PMID: 22197678; PubMed Central PMCID: PMC3580389.
680	86	2012	22187158	Fiume G, Vecchio E, De Laurentiis A, Trimboli F, Palmieri C, Pisano A, Falcone C, Pontoriero M, Rossi A, Scialdone A, Fasanella Masci F, Scala G, Quinto I. Human immunodeficiency virus-1 Tat activates NF-κB via physical interaction with IκB-α and p65. Nucleic Acids Res. 2012 Apr;40(8):3548-62. doi: 10.1093/nar/gkr1224. Epub 2011 Dec 19. PubMed PMID: 22187158; PubMed Central PMCID: PMC3333881.
681	NTU	2012	22174286	Nouretdinov I, Gammerman A, Qi Y, Klein-Seetharaman J. Determining confidence of predicted interactions between HIV-1 and human proteins using conformal method. Pac Symp Biocomput. 2012:311-22. PubMed PMID: 22174286; PubMed Central PMCID: PMC3249613.
682	LNS	2012	22142193	Shin AH, Kim HJ, Thayer SA. Subtype selective NMDA receptor antagonists induce recovery of synapses lost following exposure to HIV-1 Tat. Br J Pharmacol. 2012 Jun;166(3):1002-17. doi: 10.1111/j.1476-5381.2011.01805.x. PubMed PMID: 22142193; PubMed Central PMCID: PMC3417425.
683	LNS	2012	22141352	Ravindra KC, Narayan V, Lushington GH, Peterson BR, Prabhu KS. Targeting of histone acetyltransferase p300 by cyclopentenone prostaglandin Δ(12)-PGJ(2) through covalent binding to Cys(1438). Chem Res Toxicol. 2012 Feb 20;25(2):337-47. doi: 10.1021/tx200383c. Epub 2011 Dec 16. PubMed PMID: 22141352; PubMed Central PMCID: PMC3312006.
684	PEP, 101	2011	22140483	Mehla R, Bivalkar-Mehla S, Chauhan A. A flavonoid, luteolin, cripples HIV-1 by abrogation of tat function. PLoS One. 2011;6(11):e27915. doi: 10.1371/journal.pone.0027915. Epub 2011 Nov 30. PubMed PMID: 22140483; PubMed Central PMCID: PMC3227592.
685	LNS	2011	22140357	Rafati H, Parra M, Hakre S, Moshkin Y, Verdin E, Mahmoudi T. Repressive LTR nucleosome positioning by the BAF complex is required for HIV latency. PLoS Biol. 2011 Nov;9(11):e1001206. doi: 10.1371/journal.pbio.1001206. Epub 2011 Nov 29. Erratum in: PLoS Biol. 2015 Nov;13(11):e1002302. PubMed PMID: 22140357; PubMed Central PMCID: PMC3226458.
686	NTU	2012	22132941	Liu Y, Lee MR, Timani K, He JJ, Broxmeyer HE. Tip110 maintains expression of pluripotent factors in and pluripotency of human embryonic stem cells. Stem Cells Dev. 2012 Apr 10;21(6):829-33. doi: 10.1089/scd.2011.0512. Epub 2012 Jan 26. PubMed PMID: 22132941; PubMed Central PMCID: PMC3315760.
687	86	2012	22104210	Liao W, Tan G, Zhu Z, Chen Q, Lou Z, Dong X, Zhang W, Pan W, Chai Y. HIV-1 Tat induces biochemical changes in the serum of mice. Virology. 2012 Jan 20;422(2):288-96. doi: 10.1016/j.virol.2011.11.005. Epub 2011 Nov 21. PubMed PMID: 22104210.
688	86, 101	2011	22102648	Zou S, Fitting S, Hahn YK, Welch SP, El-Hage N, Hauser KF, Knapp PE. Morphine potentiates neurodegenerative effects of HIV-1 Tat through actions at μ-opioid receptor-expressing glia. Brain. 2011 Dec;134(Pt 12):3616-31. doi: 10.1093/brain/awr281. Epub 2011 Nov 18. PubMed PMID: 22102648; PubMed Central PMCID: PMC3235561.
689	NTU	2012	22101471	Podhaizer EM, Zou S, Fitting S, Samano KL, El-Hage N, Knapp PE, Hauser KF. Morphine and gp120 toxic interactions in striatal neurons are dependent on HIV-1 strain. J Neuroimmune Pharmacol. 2012 Dec;7(4):877-91. doi: 10.1007/s11481-011-9326-z. Epub 2011 Nov 19. PubMed PMID: 22101471; PubMed Central PMCID: PMC3314128.
690	86	2011	22093090	Suzuki M, El-Hage N, Zou S, Hahn YK, Sorrell ME, Sturgill JL, Conrad DH, Knapp PE, Hauser KF. Fractalkine/CX3CL1 protects striatal neurons from synergistic morphine and HIV-1 Tat-induced dendritic losses and death. Mol Neurodegener. 2011 Nov 17;6:78. doi: 10.1186/1750-1326-6-78. PubMed PMID: 22093090; PubMed Central PMCID: PMC3287119.
691	LNS	2011	22073215	Marban C, Su T, Ferrari R, Li B, Vatakis D, Pellegrini M, Zack JA, Rohr O, Kurdistani SK. Genome-wide binding map of the HIV-1 Tat protein to the human genome. PLoS One. 2011;6(11):e26894. doi: 10.1371/journal.pone.0026894. Epub 2011 Nov 4. PubMed PMID: 22073215; PubMed Central PMCID: PMC3208564.
692	86	2012	22067449	Le Douce V, Colin L, Redel L, Cherrier T, Herbein G, Aunis D, Rohr O, Van Lint C, Schwartz C. LSD1 cooperates with CTIP2 to promote HIV-1 transcriptional silencing. Nucleic Acids Res. 2012 Mar;40(5):1904-15. doi: 10.1093/nar/gkr857. Epub 2011 Nov 8. Erratum in: Nucleic Acids Res. . 2014 Apr;42(6):4141. PubMed PMID: 22067449; PubMed Central PMCID: PMC3300010.
693	86	2011	22046211	Honda JR, Shang S, Shanley CA, Caraway ML, Henao-Tamayo M, Chan ED, Basaraba RJ, Orme IM, Ordway DJ, Flores SC. Immune Responses of HIV-1 Tat Transgenic Mice to Mycobacterium Tuberculosis W-Beijing SA161. Open AIDS J. 2011;5:86-95. doi: 10.2174/1874613601105010086. Epub 2011 Oct 19. PubMed PMID: 22046211; PubMed Central PMCID: PMC3204420.
694	LNS	2011	22007303	Sgadari C, Barillari G, Palladino C, Bellino S, Taddeo B, Toschi E, Ensoli B. Fibroblast Growth Factor-2 and the HIV-1 Tat Protein Synergize in Promoting Bcl-2 Expression and Preventing Endothelial Cell Apoptosis: Implications for the Pathogenesis of AIDS-Associated Kaposi's Sarcoma. Int J Vasc Med. 2011;2011:452729. doi: 10.1155/2011/452729. Epub 2011 Oct 9. PubMed PMID: 22007303; PubMed Central…
695	NTU	2012	22002536	Daubner GM, Cléry A, Jayne S, Stevenin J, Allain FH. A syn-anti conformational difference allows SRSF2 to recognize guanines and cytosines equally well. EMBO J. 2012 Jan 4;31(1):162-74. doi: 10.1038/emboj.2011.367. Epub 2011 Oct 14. PubMed PMID: 22002536; PubMed Central PMCID: PMC3252578.
696	NTU	2011	21991300	Sepe M, Festa L, Tolino F, Bellucci L, Sisto L, Alfano D, Ragno P, Calabrò V, de Franciscis V, La Mantia G, Pollice A. A regulatory mechanism involving TBP-1/Tat-Binding Protein 1 and Akt/PKB in the control of cell proliferation. PLoS One. 2011;6(10):e22800. doi: 10.1371/journal.pone.0022800. Epub 2011 Oct 4. PubMed PMID: 21991300; PubMed Central PMCID: PMC3186787.
697	NTU	2011	21978457	Joshi PC, Guidot DM. HIV-1 transgene expression in rats induces differential expression of tumor necrosis factor alpha and zinc transporters in the liver and the lung. AIDS Res Ther. 2011 Oct 6;8:36. doi: 10.1186/1742-6405-8-36. PubMed PMID: 21978457; PubMed Central PMCID: PMC3204218.
698	LNS	2011	21970979	Sugiyama R, Naganuma H, Nishitsuji H, Takaku H. Human immunodeficiency virus-1 Nef suppresses Hsp70-mediated Tat activation. FEBS Lett. 2011 Nov 4;585(21):3367-71. doi: 10.1016/j.febslet.2011.09.029. Epub 2011 Sep 29. PubMed PMID: 21970979.
699	86	2012	21963936	Lichterfeld M, Gandhi RT, Simmons RP, Flynn T, Sbrolla A, Yu XG, Basgoz N, Mui S, Williams K, Streeck H, Burgett-Yandow N, Roy G, Janssens M, Pedneault L, Vandepapelière P, Koutsoukos M, Demoitié MA, Bourguignon P, McNally L, Voss G, Altfeld M. Induction of strong HIV-1-specific CD4+ T-cell responses using an HIV-1 gp120/NefTat vaccine adjuvanted with AS02A in antiretroviral-treated HIV-1-infecte…
700	PEP	2011	21957304	Yu D, Jin C, Leja J, Majdalani N, Nilsson B, Eriksson F, Essand M. Adenovirus with hexon Tat-protein transduction domain modification exhibits increased therapeutic effect in experimental neuroblastoma and neuroendocrine tumors. J Virol. 2011 Dec;85(24):13114-23. doi: 10.1128/JVI.05759-11. Epub 2011 Sep 28. PubMed PMID: 21957304; PubMed Central PMCID: PMC3233137.
701	86	2011	21956116	Chang JR, Mukerjee R, Bagashev A, Del Valle L, Chabrashvili T, Hawkins BJ, He JJ, Sawaya BE. HIV-1 Tat protein promotes neuronal dysfunction through disruption of microRNAs. J Biol Chem. 2011 Nov 25;286(47):41125-34. doi: 10.1074/jbc.M111.268466. Epub 2011 Sep 28. Erratum in: J Biol Chem. 2013 Sep 27;288(39):28303. PubMed PMID: 21956116; PubMed Central PMCID: PMC3220514.
702	86	2011	21952167	Zhou J, Neff CP, Liu X, Zhang J, Li H, Smith DD, Swiderski P, Aboellail T, Huang Y, Du Q, Liang Z, Peng L, Akkina R, Rossi JJ. Systemic administration of combinatorial dsiRNAs via nanoparticles efficiently suppresses HIV-1 infection in humanized mice. Mol Ther. 2011 Dec;19(12):2228-38. doi: 10.1038/mt.2011.207. Epub 2011 Sep 27. PubMed PMID: 21952167; PubMed Central PMCID: PMC3242666.
703	PEP	2011	21941630	Kawakami J, Yamaguchi Y, Sugimoto N. Triplet Analysis That Identifies Unpaired Regions of Functional RNAs. J Nucleic Acids. 2011;2011:471843. doi: 10.4061/2011/471843. Epub 2011 Sep 19. PubMed PMID: 21941630; PubMed Central PMCID: PMC3176430.
704	NTU	2011	21931866	Rivera CG, Mellberg S, Claesson-Welsh L, Bader JS, Popel AS. Analysis of VEGF--a regulated gene expression in endothelial cells to identify genes linked to angiogenesis. PLoS One. 2011;6(9):e24887. doi: 10.1371/journal.pone.0024887. Epub 2011 Sep 13. PubMed PMID: 21931866; PubMed Central PMCID: PMC3172305.
705	86	2011	21912693	Chi X, Amet T, Byrd D, Chang KH, Shah K, Hu N, Grantham A, Hu S, Duan J, Tao F, Nicol G, Yu Q. Direct effects of HIV-1 Tat on excitability and survival of primary dorsal root ganglion neurons: possible contribution to HIV-1-associated pain. PLoS One. 2011;6(9):e24412. doi: 10.1371/journal.pone.0024412. Epub 2011 Sep 2. PubMed PMID: 21912693; PubMed Central PMCID: PMC3166319.
706	72	2011	21912650	Lu SM, Tremblay MÈ, King IL, Qi J, Reynolds HM, Marker DF, Varrone JJ, Majewska AK, Dewhurst S, Gelbard HA. HIV-1 Tat-induced microgliosis and synaptic damage via interactions between peripheral and central myeloid cells. PLoS One. 2011;6(9):e23915. doi: 10.1371/journal.pone.0023915. Epub 2011 Sep 2. PubMed PMID: 21912650; PubMed Central PMCID: PMC3166280.
707	72	2011	21900165	El-Hage N, Dever SM, Fitting S, Ahmed T, Hauser KF. HIV-1 coinfection and morphine coexposure severely dysregulate hepatitis C virus-induced hepatic proinflammatory cytokine release and free radical production: increased pathogenesis coincides with uncoordinated host defenses. J Virol. 2011 Nov;85(22):11601-14. doi: 10.1128/JVI.05239-11. Epub 2011 Sep 7. PubMed PMID: 21900165; PubMed Central PMCI…
708	PEP	2012	21889554	Wang JT, Giuntini F, Eggleston IM, Bown SG, MacRobert AJ. Photochemical internalisation of a macromolecular protein toxin using a cell penetrating peptide-photosensitiser conjugate. J Control Release. 2012 Jan 30;157(2):305-13. doi: 10.1016/j.jconrel.2011.08.025. Epub 2011 Aug 25. PubMed PMID: 21889554.
709	PEP	2011	21876369	Lee SJ, Yoon SH, Doh KO. Enhancement of gene delivery using novel homodimeric tat peptide formed by disulfide bond. J Microbiol Biotechnol. 2011 Aug;21(8):802-7. PubMed PMID: 21876369.
710	LNS	2011	21873227	He N, Chan CK, Sobhian B, Chou S, Xue Y, Liu M, Alber T, Benkirane M, Zhou Q. Human Polymerase-Associated Factor complex (PAFc) connects the Super Elongation Complex (SEC) to RNA polymerase II on chromatin. Proc Natl Acad Sci U S A. 2011 Sep 6;108(36):E636-45. doi: 10.1073/pnas.1107107108. Epub 2011 Aug 22. PubMed PMID: 21873227; PubMed Central PMCID: PMC3169135.
711	PEP	2011	21860612	Park JS, Park SY, Cho HI, Sohn HJ, Kim TG. Enhanced Induction of T Cell Immunity Using Dendritic Cells Pulsed with HIV Tat and HCMV-pp65 Fusion Protein In Vitro. Immune Netw. 2011 Jun;11(3):182-9. doi: 10.4110/in.2011.11.3.182. Epub 2011 Jun 30. PubMed PMID: 21860612; PubMed Central PMCID: PMC3153671.
712	86	2011	21855628	Cota-Gomez A, Flores AC, Ling XF, Varella-Garcia M, Flores SC. HIV-1 Tat increases oxidant burden in the lungs of transgenic mice. Free Radic Biol Med. 2011 Nov 1;51(9):1697-707. doi: 10.1016/j.freeradbiomed.2011.07.023. Epub 2011 Aug 5. PubMed PMID: 21855628; PubMed Central PMCID: PMC3188365.
713	86	2011	21846384	Rao JS, Kim HW, Kellom M, Greenstein D, Chen M, Kraft AD, Harry GJ, Rapoport SI, Basselin M. Increased neuroinflammatory and arachidonic acid cascade markers, and reduced synaptic proteins, in brain of HIV-1 transgenic rats. J Neuroinflammation. 2011 Aug 16;8:101. doi: 10.1186/1742-2094-8-101. Erratum in: J Neuroinflammation. 2012;9:19. Retraction in: J Neuroinflammation. 2017 May 9;14 (1):95. Pu…
714	LNS	2011	21840940	Huang W, András IE, Rha GB, Hennig B, Toborek M. PPARα and PPARγ protect against HIV-1-induced MMP-9 overexpression via caveolae-associated ERK and Akt signaling. FASEB J. 2011 Nov;25(11):3979-88. doi: 10.1096/fj.11-188607. Epub 2011 Aug 12. PubMed PMID: 21840940; PubMed Central PMCID: PMC3205841.
715	86	2011	21832938	Yates NL, Lucas JT, Nolen TL, Vandergrift NA, Soderberg KA, Seaton KE, Denny TN, Haynes BF, Cohen MS, Tomaras GD. Multiple HIV-1-specific IgG3 responses decline during acute HIV-1: implications for detection of incident HIV infection. AIDS. 2011 Nov 13;25(17):2089-97. doi: 10.1097/QAD.0b013e32834b348e. PubMed PMID: 21832938; PubMed Central PMCID: PMC3667583.
716	86	2011	21829720	Agwale SM, Forbi JC, Notka F, Wrin T, Wild J, Wagner R, Wolf H. Broad antibody mediated cross-neutralization and preclinical immunogenicity of new codon-optimized HIV-1 clade CRF02_AG and G primary isolates. PLoS One. 2011;6(8):e23233. doi: 10.1371/journal.pone.0023233. Epub 2011 Aug 4. PubMed PMID: 21829720; PubMed Central PMCID: PMC3150420.
717	PEP	2011	21827164	Chao TY, Raines RT. Mechanism of ribonuclease A endocytosis: analogies to cell-penetrating peptides. Biochemistry. 2011 Oct 4;50(39):8374-82. doi: 10.1021/bi2009079. Epub 2011 Sep 7. PubMed PMID: 21827164; PubMed Central PMCID: PMC3242730.
718	PEP	2011	21826330	Niu Y, Jones AJ, Wu H, Varani G, Cai J. γ-AApeptides bind to RNA by mimicking RNA-binding proteins. Org Biomol Chem. 2011 Oct 7;9(19):6604-9. doi: 10.1039/c1ob05738c. Epub 2011 Aug 8. PubMed PMID: 21826330; PubMed Central PMCID: PMC3814216.
719	PEP, 86	2011	21819963	Boll A, Jatho A, Czudnochowski N, Geyer M, Steinem C. Mechanistic insights into the translocation of full length HIV-1 Tat across lipid membranes. Biochim Biophys Acta. 2011 Nov;1808(11):2685-93. doi: 10.1016/j.bbamem.2011.07.030. Epub 2011 Jul 27. PubMed PMID: 21819963.
720	86	2011	21819628	McIntyre GJ, Yu YH, Lomas M, Fanning GC. The effects of stem length and core placement on shRNA activity. BMC Mol Biol. 2011 Aug 8;12:34. doi: 10.1186/1471-2199-12-34. PubMed PMID: 21819628; PubMed Central PMCID: PMC3175162.
721	72	2011	21819559	Mermis J, Gu H, Xue B, Li F, Tawfik O, Buch S, Bartolome S, O'Brien-Ladner A, Dhillon NK. Hypoxia-inducible factor-1 α/platelet derived growth factor axis in HIV-associated pulmonary vascular remodeling. Respir Res. 2011 Aug 5;12:103. doi: 10.1186/1465-9921-12-103. PubMed PMID: 21819559; PubMed Central PMCID: PMC3163194.
722	72	2011	21810259	Fu X, Lawson MA, Kelley KW, Dantzer R. HIV-1 Tat activates indoleamine 2,3 dioxygenase in murine organotypic hippocampal slice cultures in a p38 mitogen-activated protein kinase-dependent manner. J Neuroinflammation. 2011 Aug 2;8:88. doi: 10.1186/1742-2094-8-88. PubMed PMID: 21810259; PubMed Central PMCID: PMC3162509.
723	PEP, 86	2011	21799765	Lakhashe SK, Wang W, Siddappa NB, Hemashettar G, Polacino P, Hu SL, Villinger F, Else JG, Novembre FJ, Yoon JK, Lee SJ, Montefiori DC, Ruprecht RM, Rasmussen RA. Vaccination against heterologous R5 clade C SHIV: prevention of infection and correlates of protection. PLoS One. 2011;6(7):e22010. doi: 10.1371/journal.pone.0022010. Epub 2011 Jul 20. PubMed PMID: 21799765; PubMed Central PMCID: PMC3140…
724	NTU	2011	21791050	Ramakrishnan R, Yu W, Rice AP. Limited redundancy in genes regulated by Cyclin T2 and Cyclin T1. BMC Res Notes. 2011 Jul 26;4:260. doi: 10.1186/1756-0500-4-260. PubMed PMID: 21791050; PubMed Central PMCID: PMC3160394.
725	101	2011	21765914	Kim Y, Hollenbaugh JA, Kim DH, Kim B. Novel PI3K/Akt inhibitors screened by the cytoprotective function of human immunodeficiency virus type 1 Tat. PLoS One. 2011;6(7):e21781. doi: 10.1371/journal.pone.0021781. Epub 2011 Jul 12. PubMed PMID: 21765914; PubMed Central PMCID: PMC3134463.
726	72	2012	21764480	Chen L, Choi JJ, Choi YJ, Hennig B, Toborek M. HIV-1 Tat-induced cerebrovascular toxicity is enhanced in mice with amyloid deposits. Neurobiol Aging. 2012 Aug;33(8):1579-90. doi: 10.1016/j.neurobiolaging.2011.06.004. Epub 2011 Jul 18. PubMed PMID: 21764480; PubMed Central PMCID: PMC3206197.
727	PEP	2011	21763501	Davidson A, Begley DW, Lau C, Varani G. A small-molecule probe induces a conformation in HIV TAR RNA capable of binding drug-like fragments. J Mol Biol. 2011 Jul 29;410(5):984-96. doi: 10.1016/j.jmb.2011.03.039. PubMed PMID: 21763501; PubMed Central PMCID: PMC3140652.
728	LNS	2011	21763500	Narayan V, Ravindra KC, Chiaro C, Cary D, Aggarwal BB, Henderson AJ, Prabhu KS. Celastrol inhibits Tat-mediated human immunodeficiency virus (HIV) transcription and replication. J Mol Biol. 2011 Jul 29;410(5):972-83. doi: 10.1016/j.jmb.2011.04.013. PubMed PMID: 21763500; PubMed Central PMCID: PMC3140654.
729	86	2011	21763496	Hoque M, Shamanna RA, Guan D, Pe'ery T, Mathews MB. HIV-1 replication and latency are regulated by translational control of cyclin T1. J Mol Biol. 2011 Jul 29;410(5):917-32. doi: 10.1016/j.jmb.2011.03.060. PubMed PMID: 21763496; PubMed Central PMCID: PMC3164259.
730	NTU	2011	21757341	Kumar S, Arya DP. Recognition of HIV TAR RNA by triazole linked neomycin dimers. Bioorg Med Chem Lett. 2011 Aug 15;21(16):4788-92. doi: 10.1016/j.bmcl.2011.06.058. Epub 2011 Jun 21. Erratum in: Bioorg Med Chem Lett. 2012 Feb 15;22(4):1827-9. PubMed PMID: 21757341; PubMed Central PMCID: PMC3673547.
731	86	2011	21752913	Das AT, Harwig A, Berkhout B. The HIV-1 Tat protein has a versatile role in activating viral transcription. J Virol. 2011 Sep;85(18):9506-16. doi: 10.1128/JVI.00650-11. Epub 2011 Jul 13. PubMed PMID: 21752913; PubMed Central PMCID: PMC3165771.
732	PEP, 72, 86, 101	2011	21745501	Rom S, Pacifici M, Passiatore G, Aprea S, Waligorska A, Del Valle L, Peruzzi F. HIV-1 Tat binds to SH3 domains: cellular and viral outcome of Tat/Grb2 interaction. Biochim Biophys Acta. 2011 Oct;1813(10):1836-44. doi: 10.1016/j.bbamcr.2011.06.012. Epub 2011 Jul 1. PubMed PMID: 21745501; PubMed Central PMCID: PMC3527102.
733	LNS	2011	21744004	Sharma A, Hu XT, Napier TC, Al-Harthi L. Methamphetamine and HIV-1 Tat down regulate β-catenin signaling: implications for methampetamine abuse and HIV-1 co-morbidity. J Neuroimmune Pharmacol. 2011 Dec;6(4):597-607. doi: 10.1007/s11481-011-9295-2. Epub 2011 Jul 9. PubMed PMID: 21744004; PubMed Central PMCID: PMC3714216.
734	86	2011	21717370	András IE, Toborek M. HIV-1-induced alterations of claudin-5 expression at the blood-brain barrier level. Methods Mol Biol. 2011;762:355-70. doi: 10.1007/978-1-61779-185-7_26. PubMed PMID: 21717370; PubMed Central PMCID: PMC3292788.
735	72	2010	21709748	D'Orso I, Frankel AD. HIV-1 Tat: Its Dependence on Host Factors is Crystal Clear. Viruses. 2010 Oct 1;2(10):2226-2234. PubMed PMID: 21709748; PubMed Central PMCID: PMC3120229.
736	86, 101	2011	21708207	Demberg T, Ettinger AC, Aladi S, McKinnon K, Kuddo T, Venzon D, Patterson LJ, Phillips TM, Robert-Guroff M. Strong viremia control in vaccinated macaques does not prevent gradual Th17 cell loss from central memory. Vaccine. 2011 Aug 11;29(35):6017-28. doi: 10.1016/j.vaccine.2011.06.032. Epub 2011 Jun 25. PubMed PMID: 21708207; PubMed Central PMCID: PMC3148322.
737	PEP	2011	21706033	Stelzer AC, Frank AT, Kratz JD, Swanson MD, Gonzalez-Hernandez MJ, Lee J, Andricioaei I, Markovitz DM, Al-Hashimi HM. Discovery of selective bioactive small molecules by targeting an RNA dynamic ensemble. Nat Chem Biol. 2011 Jun 26;7(8):553-9. doi: 10.1038/nchembio.596. PubMed PMID: 21706033; PubMed Central PMCID: PMC3319144.
738	86	2011	21699904	Van Duyne R, Guendel I, Narayanan A, Gregg E, Shafagati N, Tyagi M, Easley R, Klase Z, Nekhai S, Kehn-Hall K, Kashanchi F. Varying modulation of HIV-1 LTR activity by Baf complexes. J Mol Biol. 2011 Aug 19;411(3):581-96. doi: 10.1016/j.jmb.2011.06.001. Epub 2011 Jun 15. PubMed PMID: 21699904; PubMed Central PMCID: PMC3146592.
739	86, 101	2011	21697490	Lin PH, Ke YY, Su CT, Shiao HY, Hsieh HP, Chao YK, Lee CN, Kao CL, Chao YS, Chang SY. Inhibition of HIV-1 Tat-mediated transcription by a coumarin derivative, BPRHIV001, through the Akt pathway. J Virol. 2011 Sep;85(17):9114-26. doi: 10.1128/JVI.00175-11. Epub 2011 Jun 22. PubMed PMID: 21697490; PubMed Central PMCID: PMC3165834.
740	PEP, 86	2011	21693155	Lakhashe SK, Velu V, Sciaranghella G, Siddappa NB, Dipasquale JM, Hemashettar G, Yoon JK, Rasmussen RA, Yang F, Lee SJ, Montefiori DC, Novembre FJ, Villinger F, Amara RR, Kahn M, Hu SL, Li S, Li Z, Frankel FR, Robert-Guroff M, Johnson WE, Lieberman J, Ruprecht RM. Prime-boost vaccination with heterologous live vectors encoding SIV gag and multimeric HIV-1 gp160 protein: efficacy against repeated …
741	NTU	2011	21690627	McComsey GA, Kitch D, Sax PE, Tebas P, Tierney C, Jahed NC, Myers L, Melbourne K, Ha B, Daar ES. Peripheral and central fat changes in subjects randomized to abacavir-lamivudine or tenofovir-emtricitabine with atazanavir-ritonavir or efavirenz: ACTG Study A5224s. Clin Infect Dis. 2011 Jul 15;53(2):185-96. doi: 10.1093/cid/cir324. PubMed PMID: 21690627; PubMed Central PMCID: PMC3165963.
742	LNS	2011	21670103	Kim HJ, Shin AH, Thayer SA. Activation of cannabinoid type 2 receptors inhibits HIV-1 envelope glycoprotein gp120-induced synapse loss. Mol Pharmacol. 2011 Sep;80(3):357-66. doi: 10.1124/mol.111.071647. Epub 2011 Jun 13. PubMed PMID: 21670103; PubMed Central PMCID: PMC3164336.
743	NTU	2011	21653533	Almodovar S, Hsue PY, Morelli J, Huang L, Flores SC; Lung HIV Study. Pathogenesis of HIV-associated pulmonary hypertension: potential role of HIV-1 Nef. Proc Am Thorac Soc. 2011 Jun;8(3):308-12. doi: 10.1513/pats.201006-046WR. PubMed PMID: 21653533; PubMed Central PMCID: PMC3132790.
744	PEP	2011	21642540	Uriarte SM, Rane MJ, Luerman GC, Barati MT, Ward RA, Nauseef WM, McLeish KR. Granule exocytosis contributes to priming and activation of the human neutrophil respiratory burst. J Immunol. 2011 Jul 1;187(1):391-400. doi: 10.4049/jimmunol.1003112. Epub 2011 Jun 3. PubMed PMID: 21642540; PubMed Central PMCID: PMC3582343.
745	PEP, 86	2011	21625572	Lalonde MS, Lobritz MA, Ratcliff A, Chamanian M, Athanassiou Z, Tyagi M, Wong J, Robinson JA, Karn J, Varani G, Arts EJ. Inhibition of both HIV-1 reverse transcription and gene expression by a cyclic peptide that binds the Tat-transactivating response element (TAR) RNA. PLoS Pathog. 2011 May;7(5):e1002038. doi: 10.1371/journal.ppat.1002038. Epub 2011 May 19. PubMed PMID: 21625572; PubMed Central …
746	LNS	2011	21624130	Shen YJ, Shephard E, Douglass N, Johnston N, Adams C, Williamson C, Williamson AL. A novel candidate HIV vaccine vector based on the replication deficient Capripoxvirus, Lumpy skin disease virus (LSDV). Virol J. 2011 May 30;8:265. doi: 10.1186/1743-422X-8-265. PubMed PMID: 21624130; PubMed Central PMCID: PMC3117847.
747	LNS	2011	21620953	Lawson MA, Kelley KW, Dantzer R. Intracerebroventricular administration of HIV-1 Tat induces brain cytokine and indoleamine 2,3-dioxygenase expression: a possible mechanism for AIDS comorbid depression. Brain Behav Immun. 2011 Nov;25(8):1569-75. doi: 10.1016/j.bbi.2011.05.006. Epub 2011 May 17. PubMed PMID: 21620953; PubMed Central PMCID: PMC3191256.
748	LNS	2011	21613400	Taylor HE, Linde ME, Khatua AK, Popik W, Hildreth JE. Sterol regulatory element-binding protein 2 couples HIV-1 transcription to cholesterol homeostasis and T cell activation. J Virol. 2011 Aug;85(15):7699-709. doi: 10.1128/JVI.00337-11. Epub 2011 May 25. PubMed PMID: 21613400; PubMed Central PMCID: PMC3147916.
749	LNS	2011	21569583	Cao S, Wu C, Yang Y, Sniderhan LF, Maggirwar SB, Dewhurst S, Lu Y. Lentiviral vector-mediated stable expression of sTNFR-Fc in human macrophage and neuronal cells as a potential therapy for neuroAIDS. J Neuroinflammation. 2011 May 14;8:48. doi: 10.1186/1742-2094-8-48. PubMed PMID: 21569583; PubMed Central PMCID: PMC3118348.
750	86	2011	21569500	Hayes AM, Qian S, Yu L, Boris-Lawrie K. Tat RNA silencing suppressor activity contributes to perturbation of lymphocyte miRNA by HIV-1. Retrovirology. 2011 May 13;8:36. doi: 10.1186/1742-4690-8-36. PubMed PMID: 21569500; PubMed Central PMCID: PMC3120759.
751	86	2011	21538554	Zhu J, Ananthan S, Mactutus CF, Booze RM. Recombinant human immunodeficiency virus-1 transactivator of transcription1-86 allosterically modulates dopamine transporter activity. Synapse. 2011 Nov;65(11):1251-4. doi: 10.1002/syn.20949. Epub 2011 May 17. PubMed PMID: 21538554; PubMed Central PMCID: PMC3676522.
752	LNS	2011	21536667	Lenasi T, Peterlin BM, Barboric M. Cap-binding protein complex links pre-mRNA capping to transcription elongation and alternative splicing through positive transcription elongation factor b (P-TEFb). J Biol Chem. 2011 Jul 1;286(26):22758-68. doi: 10.1074/jbc.M111.235077. Epub 2011 May 2. PubMed PMID: 21536667; PubMed Central PMCID: PMC3123043.
753	72, 101	2011	21526160	Colin L, Vandenhoudt N, de Walque S, Van Driessche B, Bergamaschi A, Martinelli V, Cherrier T, Vanhulle C, Guiguen A, David A, Burny A, Herbein G, Pancino G, Rohr O, Van Lint C. The AP-1 binding sites located in the pol gene intragenic regulatory region of HIV-1 are important for viral replication. PLoS One. 2011 Apr 19;6(4):e19084. doi: 10.1371/journal.pone.0019084. PubMed PMID: 21526160; PubMed…
754	72	2011	21514616	Kehn-Hall K, Guendel I, Carpio L, Skaltsounis L, Meijer L, Al-Harthi L, Steiner JP, Nath A, Kutsch O, Kashanchi F. Inhibition of Tat-mediated HIV-1 replication and neurotoxicity by novel GSK3-beta inhibitors. Virology. 2011 Jun 20;415(1):56-68. doi: 10.1016/j.virol.2011.03.025. Epub 2011 Apr 22. PubMed PMID: 21514616; PubMed Central PMCID: PMC3677548.
755	86	2011	21499289	Wu YL, Ai J, Zhao JM, Xiong B, Xin XJ, Geng MY, Xin XL, Jiang HD. Sulfated polymannuroguluronate inhibits Tat-induced SLK cell adhesion via a novel binding site, a KKR spatial triad. Acta Pharmacol Sin. 2011 May;32(5):647-54. doi: 10.1038/aps.2011.2. Epub 2011 Apr 18. PubMed PMID: 21499289; PubMed Central PMCID: PMC4002517.
756	72	2011	21494611	Kiebala M, Maggirwar SB. Ibudilast, a pharmacologic phosphodiesterase inhibitor, prevents human immunodeficiency virus-1 Tat-mediated activation of microglial cells. PLoS One. 2011 Apr 8;6(4):e18633. doi: 10.1371/journal.pone.0018633. PubMed PMID: 21494611; PubMed Central PMCID: PMC3072977.
757	101	2011	21483469	Malik S, Khalique H, Buch S, Seth P. A growth factor attenuates HIV-1 Tat and morphine induced damage to human neurons: implication in HIV/AIDS-drug abuse cases. PLoS One. 2011 Mar 24;6(3):e18116. doi: 10.1371/journal.pone.0018116. PubMed PMID: 21483469; PubMed Central PMCID: PMC3063804.
758	NTU	2011	21461980	Tolde O, Folk P. Stress-induced expression of p53 target genes is insensitive to SNW1/SKIP downregulation. Cell Mol Biol Lett. 2011 Sep;16(3):373-84. doi: 10.2478/s11658-011-0012-1. Epub 2011 Apr 3. PubMed PMID: 21461980; PubMed Central PMCID: PMC6275595.
759	86	2011	21459369	González OA, Ebersole JL, Huang CB. The oral commensal, Streptococcus gordonii, synergizes with Tat protein to induce HIV-1 promoter activation in monocytes/macrophages. Cell Immunol. 2011;269(1):38-45. doi: 10.1016/j.cellimm.2011.03.008. Epub 2011 Mar 15. PubMed PMID: 21459369; PubMed Central PMCID: PMC3115710.
760	PEP	2011	21454542	Miller EH, Harrison JS, Radoshitzky SR, Higgins CD, Chi X, Dong L, Kuhn JH, Bavari S, Lai JR, Chandran K. Inhibition of Ebola virus entry by a C-peptide targeted to endosomes. J Biol Chem. 2011 May 6;286(18):15854-61. doi: 10.1074/jbc.M110.207084. Epub 2011 Mar 16. PubMed PMID: 21454542; PubMed Central PMCID: PMC3091195.
761	NTU	2012	21453127	Toossi Z, Wu M, Hirsch CS, Mayanja-Kizza H, Baseke J, Aung H, Canaday DH, Fujinaga K. Activation of P-TEFb at sites of dual HIV/TB infection, and inhibition of MTB-induced HIV transcriptional activation by the inhibitor of CDK9, Indirubin-3'-monoxime. AIDS Res Hum Retroviruses. 2012 Feb;28(2):182-7. doi: 10.1089/AID.2010.0211. Epub 2011 May 6. PubMed PMID: 21453127; PubMed Central PMCID: PMC32759…
762	86	2012	21448926	Ramakrishnan R, Rice AP. Cdk9 T-loop phosphorylation is regulated by the calcium signaling pathway. J Cell Physiol. 2012 Feb;227(2):609-17. doi: 10.1002/jcp.22760. PubMed PMID: 21448926; PubMed Central PMCID: PMC3146566.
763	NTU	2011	21447833	Liu Y, Timani K, Mantel C, Fan Y, Hangoc G, Cooper S, He JJ, Broxmeyer HE. TIP110/p110nrb/SART3/p110 regulation of hematopoiesis through CMYC. Blood. 2011 May 26;117(21):5643-51. doi: 10.1182/blood-2010-12-325332. Epub 2011 Mar 29. PubMed PMID: 21447833; PubMed Central PMCID: PMC3110023.
764	72	2011	21425908	El-Hage N, Podhaizer EM, Sturgill J, Hauser KF. Toll-like receptor expression and activation in astroglia: differential regulation by HIV-1 Tat, gp120, and morphine. Immunol Invest. 2011;40(5):498-522. doi: 10.3109/08820139.2011.561904. Epub 2011 Mar 22. PubMed PMID: 21425908; PubMed Central PMCID: PMC3287069.
765	PEP	2011	21414289	Piantavigna S, McCubbin GA, Boehnke S, Graham B, Spiccia L, Martin LL. A mechanistic investigation of cell-penetrating Tat peptides with supported lipid membranes. Biochim Biophys Acta. 2011 Jul;1808(7):1811-7. doi: 10.1016/j.bbamem.2011.03.002. Epub 2011 Mar 23. PubMed PMID: 21414289.
766	101	2011	21386885	Sanghvi VR, Steel LF. A re-examination of global suppression of RNA interference by HIV-1. PLoS One. 2011 Feb 28;6(2):e17246. doi: 10.1371/journal.pone.0017246. PubMed PMID: 21386885; PubMed Central PMCID: PMC3046114.
767	72, 86, 101	2011	21368226	Bethel-Brown C, Yao H, Callen S, Lee YH, Dash PK, Kumar A, Buch S. HIV-1 Tat-mediated induction of platelet-derived growth factor in astrocytes: role of early growth response gene 1. J Immunol. 2011 Apr 1;186(7):4119-29. doi: 10.4049/jimmunol.1002235. Epub 2011 Mar 2. PubMed PMID: 21368226; PubMed Central PMCID: PMC3110059.
768	LNS	2011	21345949	Kajaste-Rudnitski A, Marelli SS, Pultrone C, Pertel T, Uchil PD, Mechti N, Mothes W, Poli G, Luban J, Vicenzi E. TRIM22 inhibits HIV-1 transcription independently of its E3 ubiquitin ligase activity, Tat, and NF-kappaB-responsive long terminal repeat elements. J Virol. 2011 May;85(10):5183-96. doi: 10.1128/JVI.02302-10. Epub 2011 Feb 23. PubMed PMID: 21345949; PubMed Central PMCID: PMC3126207.
769	PEP	2011	21321119	Cardarelli F, Serresi M, Albanese A, Bizzarri R, Beltram F. Quantitative analysis of Tat peptide binding to import carriers reveals unconventional nuclear transport properties. J Biol Chem. 2011 Apr 8;286(14):12292-9. doi: 10.1074/jbc.M110.203083. Epub 2011 Feb 14. PubMed PMID: 21321119; PubMed Central PMCID: PMC3069432.
770	86	2011	21315782	Saiyed ZM, Gandhi N, Agudelo M, Napuri J, Samikkannu T, Reddy PV, Khatavkar P, Yndart A, Saxena SK, Nair MP. HIV-1 Tat upregulates expression of histone deacetylase-2 (HDAC2) in human neurons: implication for HIV-associated neurocognitive disorder (HAND). Neurochem Int. 2011 May;58(6):656-64. doi: 10.1016/j.neuint.2011.02.004. Epub 2011 Feb 17. PubMed PMID: 21315782; PubMed Central PMCID: PMC3085…
771	LNS	2011	21315401	Li G, Dziuba N, Friedrich B, Murray JL, Ferguson MR. A post-entry role for CD63 in early HIV-1 replication. Virology. 2011 Apr 10;412(2):315-24. doi: 10.1016/j.virol.2011.01.017. Epub 2011 Feb 26. PubMed PMID: 21315401; PubMed Central PMCID: PMC3060945.
772	PEP, 86	2011	21297117	Doetsch M, Fürtig B, Gstrein T, Stampfl S, Schroeder R. The RNA annealing mechanism of the HIV-1 Tat peptide: conversion of the RNA into an annealing-competent conformation. Nucleic Acids Res. 2011 May;39(10):4405-18. doi: 10.1093/nar/gkq1339. Epub 2011 Feb 4. PubMed PMID: 21297117; PubMed Central PMCID: PMC3105384.
773	LNS	2011	21282347	Miller HB, Robinson TJ, Gordân R, Hartemink AJ, Garcia-Blanco MA. Identification of Tat-SF1 cellular targets by exon array analysis reveals dual roles in transcription and splicing. RNA. 2011 Apr;17(4):665-74. doi: 10.1261/rna.2462011. Epub 2011 Jan 31. PubMed PMID: 21282347; PubMed Central PMCID: PMC3062177.
774	LNS	2011	21274647	Chatterjee N, Callen S, Seigel GM, Buch SJ. HIV-1 Tat-mediated neurotoxicity in retinal cells. J Neuroimmune Pharmacol. 2011 Sep;6(3):399-408. doi: 10.1007/s11481-011-9257-8. Epub 2011 Jan 28. PubMed PMID: 21274647; PubMed Central PMCID: PMC3321305.
775	86	2011	21259049	Butler TR, Smith KJ, Self RL, Braden BB, Prendergast MA. Neurodegenerative effects of recombinant HIV-1 Tat(1-86) are associated with inhibition of microtubule formation and oxidative stress-related reductions in microtubule-associated protein-2(a,b). Neurochem Res. 2011 May;36(5):819-28. doi: 10.1007/s11064-011-0409-2. Epub 2011 Jan 23. PubMed PMID: 21259049; PubMed Central PMCID: PMC3144762.
776	LNS	2011	21249135	Deshmane SL, Mukerjee R, Fan S, Sawaya BE. High-performance capillary electrophoresis for determining HIV-1 Tat protein in neurons. PLoS One. 2011 Jan 7;6(1):e16148. doi: 10.1371/journal.pone.0016148. PubMed PMID: 21249135; PubMed Central PMCID: PMC3017553.
777	LNS	2011	21226936	Nazari-Shafti TZ, Freisinger E, Roy U, Bulot CT, Senst C, Dupin CL, Chaffin AE, Srivastava SK, Mondal D, Alt EU, Izadpanah R. Mesenchymal stem cell derived hematopoietic cells are permissive to HIV-1 infection. Retrovirology. 2011 Jan 12;8(1):3. doi: 10.1186/1742-4690-8-3. PubMed PMID: 21226936; PubMed Central PMCID: PMC3025950.
778	86, 101	2011	21225391	Li L, Aiamkitsumrit B, Pirrone V, Nonnemacher MR, Wojno A, Passic S, Flaig K, Kilareski E, Blakey B, Ku J, Parikh N, Shah R, Martin-Garcia J, Moldover B, Servance L, Downie D, Lewis S, Jacobson JM, Kolson D, Wigdahl B. Development of co-selected single nucleotide polymorphisms in the viral promoter precedes the onset of human immunodeficiency virus type 1-associated neurocognitive impairment. J N…
779	LNS	2011	21223573	Huelsmann PM, Hofmann AD, Knoepfel SA, Popp J, Rauch P, Di Giallonardo F, Danke C, Gueckel E, Schambach A, Wolff H, Metzner KJ, Berens C. A suicide gene approach using the human pro-apoptotic protein tBid inhibits HIV-1 replication. BMC Biotechnol. 2011 Jan 11;11:4. doi: 10.1186/1472-6750-11-4. PubMed PMID: 21223573; PubMed Central PMCID: PMC3224247.
780	LNS	2010	21223365	Nukuzuma S, Nakamichi K, Kameoka M, Sugiura S, Nukuzuma C, Miyoshi I, Takegami T. Efficient propagation of progressive multifocal leukoencephalopathy-type JC virus in COS-7-derived cell lines stably expressing Tat protein of human immunodeficiency virus type 1. Microbiol Immunol. 2010 Dec;54(12):758-62. doi: 10.1111/j.1348-0421.2010.00278.x. PubMed PMID: 21223365.
781	LNS	2011	21220424	Huo L, Li D, Sun X, Shi X, Karna P, Yang W, Liu M, Qiao W, Aneja R, Zhou J. Regulation of Tat acetylation and transactivation activity by the microtubule-associated deacetylase HDAC6. J Biol Chem. 2011 Mar 18;286(11):9280-6. doi: 10.1074/jbc.M110.208884. Epub 2011 Jan 10. PubMed PMID: 21220424; PubMed Central PMCID: PMC3059013.
782	PEP	2011	21199870	Imamura J, Suzuki Y, Gonda K, Roy CN, Gatanaga H, Ohuchi N, Higuchi H. Single particle tracking confirms that multivalent Tat protein transduction domain-induced heparan sulfate proteoglycan cross-linkage activates Rac1 for internalization. J Biol Chem. 2011 Mar 25;286(12):10581-92. doi: 10.1074/jbc.M110.187450. Epub 2011 Jan 3. PubMed PMID: 21199870; PubMed Central PMCID: PMC3060510.
783	PEP, 86	2011	22567366	Nilson KA, Price DH. The Role of RNA Polymerase II Elongation Control in HIV-1 Gene Expression, Replication, and Latency. Genet Res Int. 2011;2011:726901. doi: 10.4061/2011/726901. Epub 2011 Oct 13. PubMed PMID: 22567366; PubMed Central PMCID: PMC3335632.
784	NTU	2010	21190575	Shah A, Kumar A. HIV-1 gp120-mediated increases in IL-8 production in astrocytes are mediated through the NF-κB pathway and can be silenced by gp120-specific siRNA. J Neuroinflammation. 2010 Dec 29;7:96. doi: 10.1186/1742-2094-7-96. PubMed PMID: 21190575; PubMed Central PMCID: PMC3023744.
785	PEP	2011	21179011	Shen Y, Yu W, Hay JG, Sauthoff H. Expressed cell-penetrating peptides can induce a bystander effect, but passage through the secretory pathway reduces protein transduction activity. Mol Ther. 2011 May;19(5):903-12. doi: 10.1038/mt.2010.283. Epub 2010 Dec 21. PubMed PMID: 21179011; PubMed Central PMCID: PMC3098630.
786	PEP	2011	21175357	Borgmann K, Rao KS, Labhasetwar V, Ghorpade A. Efficacy of Tat-conjugated ritonavir-loaded nanoparticles in reducing HIV-1 replication in monocyte-derived macrophages and cytocompatibility with macrophages and human neurons. AIDS Res Hum Retroviruses. 2011 Aug;27(8):853-62. doi: 10.1089/AID.2010.0295. Epub 2011 Feb 2. PubMed PMID: 21175357; PubMed Central PMCID: PMC3149452.
787	LNS	2010	21162735	Stephenson ST, Bostik P, Song B, Rajan D, Bhimani S, Rehulka P, Mayne AE, Ansari AA. Distinct host cell proteins incorporated by SIV replicating in CD4+ T cells from natural disease resistant versus non-natural disease susceptible hosts. Retrovirology. 2010 Dec 16;7:107. doi: 10.1186/1742-4690-7-107. PubMed PMID: 21162735; PubMed Central PMCID: PMC3012658.
788	NTU	2011	21161615	Shen X, Tomaras GD. Alterations of the B-cell response by HIV-1 replication. Curr HIV/AIDS Rep. 2011 Mar;8(1):23-30. doi: 10.1007/s11904-010-0064-2. Erratum in: Curr HIV/AIDS Rep. 2011 Mar;8(1):73. PubMed PMID: 21161615; PubMed Central PMCID: PMC3638746.
789	NTU	2011	21159859	Soares RS, Tendeiro R, Foxall RB, Baptista AP, Cavaleiro R, Gomes P, Camacho R, Valadas E, Doroana M, Lucas M, Antunes F, Victorino RM, Sousa AE. Cell-associated viral burden provides evidence of ongoing viral replication in aviremic HIV-2-infected patients. J Virol. 2011 Mar;85(5):2429-38. doi: 10.1128/JVI.01921-10. Epub 2010 Dec 15. PubMed PMID: 21159859; PubMed Central PMCID: PMC3067805.
790	86, 101	2011	21143381	Wang J, Zhang W, Nardi MA, Li Z. HIV-1 Tat-induced platelet activation and release of CD154 contribute to HIV-1-associated autoimmune thrombocytopenia. J Thromb Haemost. 2011 Mar;9(3):562-73. doi: 10.1111/j.1538-7836.2010.04168.x. PubMed PMID: 21143381; PubMed Central PMCID: PMC3050111.
791	LNS	2011	21117063	Darbinian N, Gomberg R, Mullen L, Garcia S, White MK, Khalili K, Amini S. Suppression of HIV-1 transcriptional elongation by a DING phosphatase. J Cell Biochem. 2011 Jan;112(1):225-32. doi: 10.1002/jcb.22915. PubMed PMID: 21117063; PubMed Central PMCID: PMC4503254.
792	PEP	2010	21105680	Huang W, Varani G, Drobny GP. 13C/15N-19F intermolecular REDOR NMR study of the interaction of TAR RNA with Tat peptides. J Am Chem Soc. 2010 Dec 22;132(50):17643-5. doi: 10.1021/ja1051439. Epub 2010 Nov 24. PubMed PMID: 21105680; PubMed Central PMCID: PMC3238802.
793	86	2011	21098020	Ammosova T, Yedavalli VR, Niu X, Jerebtsova M, Van Eynde A, Beullens M, Bollen M, Jeang KT, Nekhai S. Expression of a protein phosphatase 1 inhibitor, cdNIPP1, increases CDK9 threonine 186 phosphorylation and inhibits HIV-1 transcription. J Biol Chem. 2011 Feb 4;286(5):3798-804. doi: 10.1074/jbc.M110.196493. Epub 2010 Nov 22. PubMed PMID: 21098020; PubMed Central PMCID: PMC3030381.
794	LNS	2010	21087527	Pillay S, Shephard EG, Meyers AE, Williamson AL, Rybicki EP. HIV-1 sub-type C chimaeric VLPs boost cellular immune responses in mice. J Immune Based Ther Vaccines. 2010 Nov 19;8:7. doi: 10.1186/1476-8518-8-7. PubMed PMID: 21087527; PubMed Central PMCID: PMC2996383.
795	PEP	2010	21085635	Ensoli B, Bellino S, Tripiciano A, Longo O, Francavilla V, Marcotullio S, Cafaro A, Picconi O, Paniccia G, Scoglio A, Arancio A, Ariola C, Ruiz Alvarez MJ, Campagna M, Scaramuzzi D, Iori C, Esposito R, Mussini C, Ghinelli F, Sighinolfi L, Palamara G, Latini A, Angarano G, Ladisa N, Soscia F, Mercurio VS, Lazzarin A, Tambussi G, Visintini R, Mazzotta F, Di Pietro M, Galli M, Rusconi S, Carosi G, T…
796	SIV	2011	21081905	Lasaro MO, Haut LH, Zhou X, Xiang Z, Zhou D, Li Y, Giles-Davis W, Li H, Engram JC, Dimenna LJ, Bian A, Sazanovich M, Parzych EM, Kurupati R, Small JC, Wu TL, Leskowitz RM, Klatt NR, Brenchley JM, Garber DA, Lewis M, Ratcliffe SJ, Betts MR, Silvestri G, Ertl HC. Vaccine-induced T cells provide partial protection against high-dose rectal SIVmac239 challenge of rhesus macaques. Mol Ther. 2011 Feb;19…
797	PEP	2010	21081095	Wang H, Ma X, Yeh YS, Zhu Y, Daugherty MD, Frankel AD, Musier-Forsyth K, Barbara PF. Comparative analysis of RNA/protein dynamics for the arginine-rich-binding motif and zinc-finger-binding motif proteins encoded by HIV-1. Biophys J. 2010 Nov 17;99(10):3454-62. doi: 10.1016/j.bpj.2010.09.051. PubMed PMID: 21081095; PubMed Central PMCID: PMC2980704.
798	86, 101	2011	20977378	Campbell GR, Watkins JD, Loret EP, Spector SA. Differential induction of rat neuronal excitotoxic cell death by human immunodeficiency virus type 1 clade B and C tat proteins. AIDS Res Hum Retroviruses. 2011 Jun;27(6):647-54. doi: 10.1089/AID.2010.0192. Epub 2010 Dec 7. PubMed PMID: 20977378; PubMed Central PMCID: PMC3101084.
799	PEP, 101	2010	20976203	Muniz L, Egloff S, Ughy B, Jády BE, Kiss T. Controlling cellular P-TEFb activity by the HIV-1 transcriptional transactivator Tat. PLoS Pathog. 2010 Oct 14;6(10):e1001152. doi: 10.1371/journal.ppat.1001152. PubMed PMID: 20976203; PubMed Central PMCID: PMC2954905.
800	NTU	2010	20972394	Guo J, Enos C, Wu Y. Specific marking of HIV-1 positive cells using a Rev-dependent lentiviral vector expressing the green fluorescent protein. J Vis Exp. 2010 Sep 23;(43). pii: 2198. doi: 10.3791/2198. PubMed PMID: 20972394; PubMed Central PMCID: PMC3229219.
801	72	2010	20972389	Marker DF, Tremblay ME, Lu SM, Majewska AK, Gelbard HA. A thin-skull window technique for chronic two-photon in vivo imaging of murine microglia in models of neuroinflammation. J Vis Exp. 2010 Sep 19;(43). pii: 2059. doi: 10.3791/2059. PubMed PMID: 20972389; PubMed Central PMCID: PMC3216629.
802	101	2010	20970301	Liu Y, Nonnemacher MR, Stauff DL, Li L, Banerjee A, Irish B, Kilareski E, Rajagopalan N, Suchitra JB, Khan ZK, Ranga U, Wigdahl B. Structural and functional studies of CCAAT/enhancer binding sites within the human immunodeficiency virus type 1 subtype C LTR. Biomed Pharmacother. 2010 Dec;64(10):672-80. doi: 10.1016/j.biopha.2010.09.007. Epub 2010 Sep 25. PubMed PMID: 20970301; PubMed Central PMCI…
803	72	2010	20962236	Perry SW, Barbieri J, Tong N, Polesskaya O, Pudasaini S, Stout A, Lu R, Kiebala M, Maggirwar SB, Gelbard HA. Human immunodeficiency virus-1 Tat activates calpain proteases via the ryanodine receptor to enhance surface dopamine transporter levels and increase transporter-specific uptake and Vmax. J Neurosci. 2010 Oct 20;30(42):14153-64. doi: 10.1523/JNEUROSCI.1042-10.2010. PubMed PMID: 20962236; P…
804	PEP	2010	20959093	Yang ST, Zaitseva E, Chernomordik LV, Melikov K. Cell-penetrating peptide induces leaky fusion of liposomes containing late endosome-specific anionic lipid. Biophys J. 2010 Oct 20;99(8):2525-33. doi: 10.1016/j.bpj.2010.08.029. PubMed PMID: 20959093; PubMed Central PMCID: PMC2955498.
805	PEP	2010	20957220	Sakaue Y, Kim J, Miyamoto Y. Effects of TAT-conjugated platinum nanoparticles on lifespan of mitochondrial electron transport complex I-deficient Caenorhabditis elegans, nuo-1. Int J Nanomedicine. 2010 Sep 20;5:687-95. PubMed PMID: 20957220; PubMed Central PMCID: PMC2948948.
806	LNS	2011	20956357	Debebe Z, Ammosova T, Breuer D, Lovejoy DB, Kalinowski DS, Kumar K, Jerebtsova M, Ray P, Kashanchi F, Gordeuk VR, Richardson DR, Nekhai S. Iron chelators of the di-2-pyridylketone thiosemicarbazone and 2-benzoylpyridine thiosemicarbazone series inhibit HIV-1 transcription: identification of novel cellular targets--iron, cyclin-dependent kinase (CDK) 2, and CDK9. Mol Pharmacol. 2011 Jan;79(1):185-…
807	86	2010	20942971	Tansi FL, Blanchard V, Berger M, Tauber R, Reutter W, Fan H. Interaction of human dipeptidyl peptidase IV and human immunodeficiency virus type-1 transcription transactivator in Sf9 cells. Virol J. 2010 Oct 13;7:267. doi: 10.1186/1743-422X-7-267. PubMed PMID: 20942971; PubMed Central PMCID: PMC2967539.
808	86	2010	20926575	Mandal D, Feng Z, Stoltzfus CM. Excessive RNA splicing and inhibition of HIV-1 replication induced by modified U1 small nuclear RNAs. J Virol. 2010 Dec;84(24):12790-800. doi: 10.1128/JVI.01257-10. Epub 2010 Oct 6. PubMed PMID: 20926575; PubMed Central PMCID: PMC3004309.
809	PEP	2010	20925426	Rayapureddi JP, Tomamichel WJ, Walton ST, Payne RM. TAT fusion protein transduction into isolated mitochondria is accelerated by sodium channel inhibitors. Biochemistry. 2010 Nov 9;49(44):9470-9. doi: 10.1021/bi101057v. PubMed PMID: 20925426; PubMed Central PMCID: PMC3043115.
810	NAP	2010	20876987	Bayanolhagh S, Alinezhad M, Kamali K, Foroughi M, Khorram Khorshid HR, Mohraz M, Mahboudi F, Pourfathollah AA. Characterization of immune responses induced by combined clade-A HIV-1 recombinant adenovectors in mice. Iran J Immunol. 2010 Sep;7(3):162-76. doi: IJIv7i3A4. PubMed PMID: 20876987.
811	86	2010	20876377	Kremb S, Helfer M, Heller W, Hoffmann D, Wolff H, Kleinschmidt A, Cepok S, Hemmer B, Durner J, Brack-Werner R. EASY-HIT: HIV full-replication technology for broad discovery of multiple classes of HIV inhibitors. Antimicrob Agents Chemother. 2010 Dec;54(12):5257-68. doi: 10.1128/AAC.00515-10. Epub 2010 Sep 27. PubMed PMID: 20876377; PubMed Central PMCID: PMC2981278.
812	86, 101	2010	20862322	Kim N, Kukkonen S, Gupta S, Aldovini A. Association of Tat with promoters of PTEN and PP2A subunits is key to transcriptional activation of apoptotic pathways in HIV-infected CD4+ T cells. PLoS Pathog. 2010 Sep 16;6(9):e1001103. doi: 10.1371/journal.ppat.1001103. PubMed PMID: 20862322; PubMed Central PMCID: PMC2940756.
813	86	2010	20861260	Tervo HM, Keppler OT. High natural permissivity of primary rabbit cells for HIV-1, with a virion infectivity defect in macrophages as the final replication barrier. J Virol. 2010 Dec;84(23):12300-14. doi: 10.1128/JVI.01607-10. Epub 2010 Sep 22. PubMed PMID: 20861260; PubMed Central PMCID: PMC2976396.
814	PEP	2010	20846412	Kim GJ, Lee HS, Hong KJ, Kim SS. Dynamic correlation between CTL response and viral load in primary human immunodeficiency virus-1 infected Koreans. Virol J. 2010 Sep 16;7:239. doi: 10.1186/1743-422X-7-239. PubMed PMID: 20846412; PubMed Central PMCID: PMC2949841.
815	PEP	2010	20826758	Léonetti M, Gadzinski A, Moine G. Cell surface heparan sulfate proteoglycans influence MHC class II-restricted antigen presentation. J Immunol. 2010 Oct 1;185(7):3847-56. doi: 10.4049/jimmunol.0902724. Epub 2010 Sep 8. PubMed PMID: 20826758.
816	LNS	2010	20808813	Kimpel J, Braun SE, Qiu G, Wong FE, Conolle M, Schmitz JE, Brendel C, Humeau LM, Dropulic B, Rossi JJ, Berger A, von Laer D, Johnson RP. Survival of the fittest: positive selection of CD4+ T cells expressing a membrane-bound fusion inhibitor following HIV-1 infection. PLoS One. 2010 Aug 23;5(8):e12357. doi: 10.1371/journal.pone.0012357. PubMed PMID: 20808813; PubMed Central PMCID: PMC2925957.
817	86	2010	20808803	Krueger BJ, Varzavand K, Cooper JJ, Price DH. The mechanism of release of P-TEFb and HEXIM1 from the 7SK snRNP by viral and cellular activators includes a conformational change in 7SK. PLoS One. 2010 Aug 23;5(8):e12335. doi: 10.1371/journal.pone.0012335. PubMed PMID: 20808803; PubMed Central PMCID: PMC2925947.
818	LNS	2011	20802087	Dhillon NK, Li F, Xue B, Tawfik O, Morgello S, Buch S, Ladner AO. Effect of cocaine on human immunodeficiency virus-mediated pulmonary endothelial and smooth muscle dysfunction. Am J Respir Cell Mol Biol. 2011 Jul;45(1):40-52. doi: 10.1165/rcmb.2010-0097OC. Epub 2010 Aug 27. PubMed PMID: 20802087; PubMed Central PMCID: PMC3145070.
819	PEP	2010	20797319	Lee SH, Jeong HJ, Kim DW, Sohn EJ, Kim MJ, Kim DS, Kang TC, Lim SS, Kang IJ, Cho SW, Lee KS, Park J, Eum WS, Choi SY. Enhancement of HIV-1 Tat fusion protein transduction efficiency by bog blueberry anthocyanins. BMB Rep. 2010 Aug;43(8):561-6. PubMed PMID: 20797319.
820	86	2010	20796175	Ferris MJ, Frederick-Duus D, Fadel J, Mactutus CF, Booze RM. Hyperdopaminergic tone in HIV-1 protein treated rats and cocaine sensitization. J Neurochem. 2010 Nov;115(4):885-96. doi: 10.1111/j.1471-4159.2010.06968.x. Epub 2010 Oct 5. PubMed PMID: 20796175; PubMed Central PMCID: PMC4041991.
821	NTU	2011	20724442	Davidson A, Patora-Komisarska K, Robinson JA, Varani G. Essential structural requirements for specific recognition of HIV TAR RNA by peptide mimetics of Tat protein. Nucleic Acids Res. 2011 Jan;39(1):248-56. doi: 10.1093/nar/gkq713. Epub 2010 Aug 19. PubMed PMID: 20724442; PubMed Central PMCID: PMC3017588.
822	PEP, 72, 101	2010	20686703	Kiebala M, Polesskaya O, Yao Z, Perry SW, Maggirwar SB. Nuclear factor-kappa B family member RelB inhibits human immunodeficiency virus-1 Tat-induced tumor necrosis factor-alpha production. PLoS One. 2010 Jul 29;5(7):e11875. doi: 10.1371/journal.pone.0011875. PubMed PMID: 20686703; PubMed Central PMCID: PMC2912378.
823	86	2010	20685659	Tranell A, Fenyö EM, Schwartz S. Serine- and arginine-rich proteins 55 and 75 (SRp55 and SRp75) induce production of HIV-1 vpr mRNA by inhibiting the 5'-splice site of exon 3. J Biol Chem. 2010 Oct 8;285(41):31537-47. doi: 10.1074/jbc.M109.077453. Epub 2010 Aug 4. PubMed PMID: 20685659; PubMed Central PMCID: PMC2951228.
824	PEP, 101	2010	20661303	Van Grol J, Subauste C, Andrade RM, Fujinaga K, Nelson J, Subauste CS. HIV-1 inhibits autophagy in bystander macrophage/monocytic cells through Src-Akt and STAT3. PLoS One. 2010 Jul 22;5(7):e11733. doi: 10.1371/journal.pone.0011733. PubMed PMID: 20661303; PubMed Central PMCID: PMC2908694.
825	PEP	2010	20655843	Ciobanasu C, Siebrasse JP, Kubitscheck U. Cell-penetrating HIV1 TAT peptides can generate pores in model membranes. Biophys J. 2010 Jul 7;99(1):153-62. doi: 10.1016/j.bpj.2010.03.065. PubMed PMID: 20655843; PubMed Central PMCID: PMC2895395.
826	86	2010	20651230	Fitting S, Xu R, Bull C, Buch SK, El-Hage N, Nath A, Knapp PE, Hauser KF. Interactive comorbidity between opioid drug abuse and HIV-1 Tat: chronic exposure augments spine loss and sublethal dendritic pathology in striatal neurons. Am J Pathol. 2010 Sep;177(3):1397-410. doi: 10.2353/ajpath.2010.090945. Epub 2010 Jul 22. PubMed PMID: 20651230; PubMed Central PMCID: PMC2928972.
827	86, 101	2010	20646276	van der Kuyl AC, Kozaczynska K, Ariën KK, Gali Y, Balázs VR, Dekker SJ, Zorgdrager F, Vanham G, Berkhout B, Cornelissen M. Analysis of infectious virus clones from two HIV-1 superinfection cases suggests that the primary strains have lower fitness. Retrovirology. 2010 Jul 20;7:60. doi: 10.1186/1742-4690-7-60. PubMed PMID: 20646276; PubMed Central PMCID: PMC2918528.
828	72	2010	20631305	Akhtar LN, Qin H, Muldowney MT, Yanagisawa LL, Kutsch O, Clements JE, Benveniste EN. Suppressor of cytokine signaling 3 inhibits antiviral IFN-beta signaling to enhance HIV-1 replication in macrophages. J Immunol. 2010 Aug 15;185(4):2393-404. doi: 10.4049/jimmunol.0903563. Epub 2010 Jul 14. PubMed PMID: 20631305; PubMed Central PMCID: PMC3935802.
829	86	2010	20628499	Carpio L, Klase Z, Coley W, Guendel I, Choi S, Van Duyne R, Narayanan A, Kehn-Hall K, Meijer L, Kashanchi F. microRNA machinery is an integral component of drug-induced transcription inhibition in HIV-1 infection. J RNAi Gene Silencing. 2010 May 29;6(1):386-400. PubMed PMID: 20628499; PubMed Central PMCID: PMC2902143.
830	LNS	2010	20624908	Pathak S, Wentzel-Larsen T, Asjö B. Effects of in vitro HIV-1 infection on mycobacterial growth in peripheral blood monocyte-derived macrophages. Infect Immun. 2010 Sep;78(9):4022-32. doi: 10.1128/IAI.00106-10. Epub 2010 Jul 12. PubMed PMID: 20624908; PubMed Central PMCID: PMC2937445.
831	PEP	2011	20615470	Pagans S, Sakane N, Schnölzer M, Ott M. Characterization of HIV Tat modifications using novel methyl-lysine-specific antibodies. Methods. 2011 Jan;53(1):91-6. doi: 10.1016/j.ymeth.2010.07.001. Epub 2010 Jul 6. PubMed PMID: 20615470; PubMed Central PMCID: PMC3478124.
832	86, 101	2010	20599239	Easley R, Carpio L, Dannenberg L, Choi S, Alani D, Van Duyne R, Guendel I, Klase Z, Agbottah E, Kehn-Hall K, Kashanchi F. Transcription through the HIV-1 nucleosomes: effects of the PBAF complex in Tat activated transcription. Virology. 2010 Sep 30;405(2):322-33. doi: 10.1016/j.virol.2010.06.009. PubMed PMID: 20599239; PubMed Central PMCID: PMC2923259.
833	PEP, 86	2010	20598119	Dembek CJ, Kutscher S, Heltai S, Allgayer S, Biswas P, Ghezzi S, Vicenzi E, Hoffmann D, Reitmeir P, Tambussi G, Bogner JR, Lusso P, Stellbrink HJ, Santagostino E, Vollbrecht T, Goebel FD, Protzer U, Draenert R, Tinelli M, Poli G, Erfle V, Malnati M, Cosma A. Nef-specific CD45RA+ CD8+ T cells secreting MIP-1beta but not IFN-gamma are associated with nonprogressive HIV-1 infection. AIDS Res Ther. 2…
834	72, 86	2010	20578042	Zou W, Wang Z, Liu Y, Fan Y, Zhou BY, Yang XF, He JJ. Involvement of p300 in constitutive and HIV-1 Tat-activated expression of glial fibrillary acidic protein in astrocytes. Glia. 2010 Oct;58(13):1640-8. doi: 10.1002/glia.21038. PubMed PMID: 20578042; PubMed Central PMCID: PMC2919602.
835	LNS	2010	20574442	Kronenberg K, Brosch S, Butsch F, Tada Y, Shibagaki N, Udey MC, von Stebut E. Vaccination with TAT-antigen fusion protein induces protective, CD8(+) T cell-mediated immunity against Leishmania major. J Invest Dermatol. 2010 Nov;130(11):2602-10. doi: 10.1038/jid.2010.171. Epub 2010 Jun 24. PubMed PMID: 20574442.
836	72	2010	20562857	D'Orso I, Frankel AD. RNA-mediated displacement of an inhibitory snRNP complex activates transcription elongation. Nat Struct Mol Biol. 2010 Jul;17(7):815-21. doi: 10.1038/nsmb.1827. Epub 2010 Jun 20. PubMed PMID: 20562857; PubMed Central PMCID: PMC2921552.
837	PEP	2010	20558598	Law SK, Wang RR, Mak AN, Wong KB, Zheng YT, Shaw PC. A switch-on mechanism to activate maize ribosome-inactivating protein for targeting HIV-infected cells. Nucleic Acids Res. 2010 Oct;38(19):6803-12. doi: 10.1093/nar/gkq551. Epub 2010 Jun 17. PubMed PMID: 20558598; PubMed Central PMCID: PMC2965250.
838	LNS	2010	20551309	O'Brien SK, Cao H, Nathans R, Ali A, Rana TM. P-TEFb kinase complex phosphorylates histone H1 to regulate expression of cellular and HIV-1 genes. J Biol Chem. 2010 Sep 24;285(39):29713-20. doi: 10.1074/jbc.M110.125997. Epub 2010 Jun 15. PubMed PMID: 20551309; PubMed Central PMCID: PMC2943301.
839	PEP	2010	20550193	Su Y, Waring AJ, Ruchala P, Hong M. Membrane-bound dynamic structure of an arginine-rich cell-penetrating peptide, the protein transduction domain of HIV TAT, from solid-state NMR. Biochemistry. 2010 Jul 27;49(29):6009-20. doi: 10.1021/bi100642n. PubMed PMID: 20550193; PubMed Central PMCID: PMC2925115.
840	LNS	2010	20538859	Wolschendorf F, Duverger A, Jones J, Wagner FH, Huff J, Benjamin WH, Saag MS, Niederweis M, Kutsch O. Hit-and-run stimulation: a novel concept to reactivate latent HIV-1 infection without cytokine gene induction. J Virol. 2010 Sep;84(17):8712-20. doi: 10.1128/JVI.00523-10. Epub 2010 Jun 10. PubMed PMID: 20538859; PubMed Central PMCID: PMC2919022.
841	PEP, 86	2010	20535204	Tahirov TH, Babayeva ND, Varzavand K, Cooper JJ, Sedore SC, Price DH. Crystal structure of HIV-1 Tat complexed with human P-TEFb. Nature. 2010 Jun 10;465(7299):747-51. doi: 10.1038/nature09131. PubMed PMID: 20535204; PubMed Central PMCID: PMC2885016.
842	PEP	2011	20503268	Wang Q, Wu PC, Roberson RS, Luk BV, Ivanova I, Chu E, Wu DY. Survivin and escaping in therapy-induced cellular senescence. Int J Cancer. 2011 Apr 1;128(7):1546-58. doi: 10.1002/ijc.25482. Epub 2010 May 25. PubMed PMID: 20503268; PubMed Central PMCID: PMC3000873.
843	86	2010	20486932	Loh B, Vozzolo L, Mok BJ, Lee CC, Fitzmaurice RJ, Caddick S, Fassati A. Inhibition of HIV-1 replication by isoxazolidine and isoxazole sulfonamides. Chem Biol Drug Des. 2010 May;75(5):461-74. doi: 10.1111/j.1747-0285.2010.00956.x. PubMed PMID: 20486932; PubMed Central PMCID: PMC2917890.
844	101	2010	20471949	Sobhian B, Laguette N, Yatim A, Nakamura M, Levy Y, Kiernan R, Benkirane M. HIV-1 Tat assembles a multifunctional transcription elongation complex and stably associates with the 7SK snRNP. Mol Cell. 2010 May 14;38(3):439-51. doi: 10.1016/j.molcel.2010.04.012. PubMed PMID: 20471949; PubMed Central PMCID: PMC3595998.
845	LNS	2010	20471948	He N, Liu M, Hsu J, Xue Y, Chou S, Burlingame A, Krogan NJ, Alber T, Zhou Q. HIV-1 Tat and host AFF4 recruit two transcription elongation factors into a bifunctional complex for coordinated activation of HIV-1 transcription. Mol Cell. 2010 May 14;38(3):428-38. doi: 10.1016/j.molcel.2010.04.013. PubMed PMID: 20471948; PubMed Central PMCID: PMC3085314.
846	86	2010	20457808	Wu RF, Ma Z, Liu Z, Terada LS. Nox4-derived H2O2 mediates endoplasmic reticulum signaling through local Ras activation. Mol Cell Biol. 2010 Jul;30(14):3553-68. doi: 10.1128/MCB.01445-09. Epub 2010 May 10. PubMed PMID: 20457808; PubMed Central PMCID: PMC2897542.
847	101	2011	20414733	Fan Y, Zou W, Green LA, Kim BO, He JJ. Activation of Egr-1 expression in astrocytes by HIV-1 Tat: new insights into astrocyte-mediated Tat neurotoxicity. J Neuroimmune Pharmacol. 2011 Mar;6(1):121-9. doi: 10.1007/s11481-010-9217-8. Epub 2010 Apr 23. PubMed PMID: 20414733; PubMed Central PMCID: PMC3056338.
848	86	2010	20403075	Hahn YK, Vo P, Fitting S, Block ML, Hauser KF, Knapp PE. beta-Chemokine production by neural and glial progenitor cells is enhanced by HIV-1 Tat: effects on microglial migration. J Neurochem. 2010 Jul;114(1):97-109. doi: 10.1111/j.1471-4159.2010.06744.x. Epub 2010 Apr 9. PubMed PMID: 20403075; PubMed Central PMCID: PMC2992981.
849	86	2010	20386714	Nazli A, Chan O, Dobson-Belaire WN, Ouellet M, Tremblay MJ, Gray-Owen SD, Arsenault AL, Kaushic C. Exposure to HIV-1 directly impairs mucosal epithelial barrier integrity allowing microbial translocation. PLoS Pathog. 2010 Apr 8;6(4):e1000852. doi: 10.1371/journal.ppat.1000852. PubMed PMID: 20386714; PubMed Central PMCID: PMC2851733.
850	LNS	2011	20385240	Chen R, Liu M, Zhang K, Zhou Q. Isolation and functional characterization of P-TEFb-associated factors that control general and HIV-1 transcriptional elongation. Methods. 2011 Jan;53(1):85-90. doi: 10.1016/j.ymeth.2010.04.005. Epub 2010 Apr 10. PubMed PMID: 20385240; PubMed Central PMCID: PMC6208320.
851	PEP, 86, 101	2010	20378550	Wong JK, Campbell GR, Spector SA. Differential induction of interleukin-10 in monocytes by HIV-1 clade B and clade C Tat proteins. J Biol Chem. 2010 Jun 11;285(24):18319-25. doi: 10.1074/jbc.M110.120840. Epub 2010 Apr 8. PubMed PMID: 20378550; PubMed Central PMCID: PMC2881757.
852	86	2010	20377749	Tanaka Y, Mori Y, Tani H, Abe T, Moriishi K, Kojima H, Nagano T, Okabe T, Suzuki T, Tatsumi M, Matsuura Y. Establishment of an indicator cell system for hepatitis C virus. Microbiol Immunol. 2010 Apr;54(4):206-20. doi: 10.1111/j.1348-0421.2010.00209.x. PubMed PMID: 20377749.
853	86	2010	20377426	Banerjee K, Klasse PJ, Sanders RW, Pereyra F, Michael E, Lu M, Walker BD, Moore JP. IgG subclass profiles in infected HIV type 1 controllers and chronic progressors and in uninfected recipients of Env vaccines. AIDS Res Hum Retroviruses. 2010 Apr;26(4):445-58. doi: 10.1089/aid.2009.0223. PubMed PMID: 20377426; PubMed Central PMCID: PMC2864049.
854	86, 101	2010	20363291	Aksenov MY, Aksenova MV, Mactutus CF, Booze RM. HIV-1 protein-mediated amyloidogenesis in rat hippocampal cell cultures. Neurosci Lett. 2010 May 21;475(3):174-8. doi: 10.1016/j.neulet.2010.03.073. Epub 2010 Apr 2. PubMed PMID: 20363291; PubMed Central PMCID: PMC2874942.
855	NTU	2009	20352020	Irish BP, Khan ZK, Jain P, Nonnemacher MR, Pirrone V, Rahman S, Rajagopalan N, Suchitra JB, Mostoller K, Wigdahl B. Molecular Mechanisms of Neurodegenerative Diseases Induced by Human Retroviruses: A Review. Am J Infect Dis. 2009 Jul 1;5(3):231-258. PubMed PMID: 20352020; PubMed Central PMCID: PMC2845477.
856	86	2010	20340172	Adams SM, Aksenova MV, Aksenov MY, Mactutus CF, Booze RM. ER-β mediates 17β-estradiol attenuation of HIV-1 Tat-induced apoptotic signaling. Synapse. 2010 Nov;64(11):829-38. doi: 10.1002/syn.20793. PubMed PMID: 20340172; PubMed Central PMCID: PMC3428118.
857	72, 86	2010	20336759	Yang Y, Wu J, Lu Y. Mechanism of HIV-1-TAT induction of interleukin-1beta from human monocytes: Involvement of the phospholipase C/protein kinase C signaling cascade. J Med Virol. 2010 May;82(5):735-46. doi: 10.1002/jmv.21720. PubMed PMID: 20336759; PubMed Central PMCID: PMC2849807.
858	PEP	2010	20335256	Love TM, Thurston SW, Keefer MC, Dewhurst S, Lee HY. Mathematical modeling of ultradeep sequencing data reveals that acute CD8+ T-lymphocyte responses exert strong selective pressure in simian immunodeficiency virus-infected macaques but still fail to clear founder epitope sequences. J Virol. 2010 Jun;84(11):5802-14. doi: 10.1128/JVI.00117-10. Epub 2010 Mar 24. PubMed PMID: 20335256; PubMed Centr…
859	86, 101	2010	20335163	Imai K, Togami H, Okamoto T. Involvement of histone H3 lysine 9 (H3K9) methyltransferase G9a in the maintenance of HIV-1 latency and its reactivation by BIX01294. J Biol Chem. 2010 May 28;285(22):16538-45. doi: 10.1074/jbc.M110.103531. Epub 2010 Mar 24. PubMed PMID: 20335163; PubMed Central PMCID: PMC2878073.
860	PEP, 72	2010	20227666	Pagans S, Kauder SE, Kaehlcke K, Sakane N, Schroeder S, Dormeyer W, Trievel RC, Verdin E, Schnolzer M, Ott M. The Cellular lysine methyltransferase Set7/9-KMT7 binds HIV-1 TAR RNA, monomethylates the viral transactivator Tat, and enhances HIV transcription. Cell Host Microbe. 2010 Mar 18;7(3):234-44. doi: 10.1016/j.chom.2010.02.005. PubMed PMID: 20227666; PubMed Central PMCID: PMC2844784.
861	NTU	2010	20227660	Rice AP. The HIV-1 Tat team gets bigger. Cell Host Microbe. 2010 Mar 18;7(3):179-81. doi: 10.1016/j.chom.2010.03.001. PubMed PMID: 20227660.
862	PEP, 86	2010	20224549	Rayne F, Debaisieux S, Yezid H, Lin YL, Mettling C, Konate K, Chazal N, Arold ST, Pugnière M, Sanchez F, Bonhoure A, Briant L, Loret E, Roy C, Beaumelle B. Phosphatidylinositol-(4,5)-bisphosphate enables efficient secretion of HIV-1 Tat by infected T-cells. EMBO J. 2010 Apr 21;29(8):1348-62. doi: 10.1038/emboj.2010.32. Epub 2010 Mar 11. PubMed PMID: 20224549; PubMed Central PMCID: PMC2868572.
863	LNS	2010	20188164	Banerjee A, Zhang X, Manda KR, Banks WA, Ercal N. HIV proteins (gp120 and Tat) and methamphetamine in oxidative stress-induced damage in the brain: potential role of the thiol antioxidant N-acetylcysteine amide. Free Radic Biol Med. 2010 May 15;48(10):1388-98. doi: 10.1016/j.freeradbiomed.2010.02.023. Epub 2010 Feb 24. PubMed PMID: 20188164; PubMed Central PMCID: PMC2873898.
864	LNS	2010	20153010	Sreenath K, Pavithra L, Singh S, Sinha S, Dash PK, Siddappa NB, Ranga U, Mitra D, Chattopadhyay S. Nuclear matrix protein SMAR1 represses HIV-1 LTR mediated transcription through chromatin remodeling. Virology. 2010 Apr 25;400(1):76-85. doi: 10.1016/j.virol.2010.01.017. Epub 2010 Feb 11. PubMed PMID: 20153010.
865	72, 101	2010	20139419	López-Huertas MR, Callejas S, Abia D, Mateos E, Dopazo A, Alcamí J, Coiras M. Modifications in host cell cytoskeleton structure and function mediated by intracellular HIV-1 Tat protein are greatly dependent on the second coding exon. Nucleic Acids Res. 2010 Jun;38(10):3287-307. doi: 10.1093/nar/gkq037. Epub 2010 Feb 5. PubMed PMID: 20139419; PubMed Central PMCID: PMC2879518.
866	LNS	2010	20139322	Huang W, Rha GB, Chen L, Seelbach MJ, Zhang B, András IE, Bruemmer D, Hennig B, Toborek M. Inhibition of telomerase activity alters tight junction protein expression and induces transendothelial migration of HIV-1-infected cells. Am J Physiol Heart Circ Physiol. 2010 Apr;298(4):H1136-45. doi: 10.1152/ajpheart.01126.2009. Epub 2010 Feb 5. PubMed PMID: 20139322; PubMed Central PMCID: PMC2853419.
867	86	2010	20121167	Fitting S, Zou S, Chen W, Vo P, Hauser KF, Knapp PE. Regional heterogeneity and diversity in cytokine and chemokine production by astroglia: differential responses to HIV-1 Tat, gp120, and morphine revealed by multiplex analysis. J Proteome Res. 2010 Apr 5;9(4):1795-804. doi: 10.1021/pr900926n. PubMed PMID: 20121167; PubMed Central PMCID: PMC2856623.
868	86	2010	20113193	Sultana S, Li H, Puche A, Jones O, Bryant JL, Royal W. Quantitation of parvalbumin+ neurons and human immunodeficiency virus type 1 (HIV-1) regulatory gene expression in the HIV-1 transgenic rat: effects of vitamin A deficiency and morphine. J Neurovirol. 2010 Feb;16(1):33-40. doi: 10.3109/13550280903555712. PubMed PMID: 20113193; PubMed Central PMCID: PMC5423786.
869	LNS	2010	20111599	Vasan S, Schlesinger SJ, Chen Z, Hurley A, Lombardo A, Than S, Adesanya P, Bunce C, Boaz M, Boyle R, Sayeed E, Clark L, Dugin D, Boente-Carrera M, Schmidt C, Fang Q, LeiBa, Huang Y, Zaharatos GJ, Gardiner DF, Caskey M, Seamons L, Ho M, Dally L, Smith C, Cox J, Gill D, Gilmour J, Keefer MC, Fast P, Ho DD. Phase 1 safety and immunogenicity evaluation of ADMVA, a multigenic, modified vaccinia Ankara…
870	LNS	2010	20111582	Vasan S, Schlesinger SJ, Huang Y, Hurley A, Lombardo A, Chen Z, Than S, Adesanya P, Bunce C, Boaz M, Boyle R, Sayeed E, Clark L, Dugin D, Schmidt C, Song Y, Seamons L, Dally L, Ho M, Smith C, Markowitz M, Cox J, Gill DK, Gilmour J, Keefer MC, Fast P, Ho DD. Phase 1 safety and immunogenicity evaluation of ADVAX, a multigenic, DNA-based clade C/B' HIV-1 candidate vaccine. PLoS One. 2010 Jan 25;5(1)…
871	PEP	2010	20108167	Lee JA, Song HY, Ju SM, Lee SJ, Seo WY, Sin DH, Goh AR, Choi SY, Park J. Suppression of inducible nitric oxide synthase and cyclooxygenase-2 by cell-permeable superoxide dismutase in lipopolysaccharide-stimulated BV-2 microglial cells. Mol Cells. 2010 Mar;29(3):245-50. doi: 10.1007/s10059-010-0031-1. Epub 2010 Jan 21. PubMed PMID: 20108167.
872	NTU	2010	20106497	Guglietta S, Pantaleo G, Graziosi C. Long sequence duplications, repeats, and palindromes in HIV-1 gp120: length variation in V4 as the product of misalignment mechanism. Virology. 2010 Mar 30;399(1):167-175. doi: 10.1016/j.virol.2009.12.030. Epub 2010 Jan 27. PubMed PMID: 20106497.
873	PEP	2010	20091677	Jankowska E, Gaczynska M, Osmulski P, Sikorska E, Rostankowski R, Madabhushi S, Tokmina-Lukaszewska M, Kasprzykowski F. Potential allosteric modulators of the proteasome activity. Biopolymers. 2010 May;93(5):481-95. doi: 10.1002/bip.21381. PubMed PMID: 20091677; PubMed Central PMCID: PMC2882558.
874	86	2010	20089805	Raborn ES, Cabral GA. Cannabinoid inhibition of macrophage migration to the trans-activating (Tat) protein of HIV-1 is linked to the CB(2) cannabinoid receptor. J Pharmacol Exp Ther. 2010 Apr;333(1):319-27. doi: 10.1124/jpet.109.163055. Epub 2010 Jan 20. PubMed PMID: 20089805; PubMed Central PMCID: PMC2846023.
875	LNS	2009	20064163	Imai K, Asamitsu K, Victoriano AF, Cueno ME, Fujinaga K, Okamoto T. Cyclin T1 stabilizes expression levels of HIV-1 Tat in cells. FEBS J. 2009 Dec;276(23):7124-33. doi: 10.1111/j.1742-4658.2009.07424.x. PubMed PMID: 20064163.
876	LNS	2010	20054825	Hoque M, Mathews MB, Pe'ery T. Progranulin (granulin/epithelin precursor) and its constituent granulin repeats repress transcription from cellular promoters. J Cell Physiol. 2010 Apr;223(1):224-33. doi: 10.1002/jcp.22031. PubMed PMID: 20054825; PubMed Central PMCID: PMC2904068.
877	101	2010	23554612	Wei B, Feng N, Zhou F, Lu C, Su J, Hua L. Construction and identification of recombinant lentiviral vector containing HIV-1 Tat gene and its expression in 293T cells. J Biomed Res. 2010 Jan;24(1):58-63. doi: 10.1016/S1674-8301(10)60009-7. PubMed PMID: 23554612; PubMed Central PMCID: PMC3596536.
878	PEP	2009	20038937	Münst B, Patsch C, Edenhofer F. Engineering cell-permeable protein. J Vis Exp. 2009 Dec 28;(34). pii: 1627. doi: 10.3791/1627. PubMed PMID: 20038937; PubMed Central PMCID: PMC3149971.
879	101	2009	20019835	Chen X, Cheng L, Jia X, Zeng Y, Yao S, Lv Z, Qin D, Fang X, Lei Y, Lu C. Human immunodeficiency virus type 1 Tat accelerates Kaposi sarcoma-associated herpesvirus Kaposin A-mediated tumorigenesis of transformed fibroblasts in vitro as well as in nude and immunocompetent mice. Neoplasia. 2009 Dec;11(12):1272-84. PubMed PMID: 20019835; PubMed Central PMCID: PMC2794508.
880	NAP	2010	20010851	Pan J, Qian J, Zhang Y, Ma J, Wang G, Xiao Q, Chen S, Ding J. Small peptide inhibitor of JNKs protects against MPTP-induced nigral dopaminergic injury via inhibiting the JNK-signaling pathway. Lab Invest. 2010 Feb;90(2):156-67. doi: 10.1038/labinvest.2009.124. Epub 2009 Dec 14. PubMed PMID: 20010851.
881	NTU	2010	20009918	Shrestha S, Irvin MR, Taylor KD, Wiener HW, Pajewski NM, Haritunians T, Delaney JA, Schambelan M, Polak JF, Arnett DK, Chen YD, Grunfeld C. A genome-wide association study of carotid atherosclerosis in HIV-infected men. AIDS. 2010 Feb 20;24(4):583-92. doi: 10.1097/QAD.0b013e3283353c9e. PubMed PMID: 20009918; PubMed Central PMCID: PMC3072760.
882	PEP	2010	19994901	Olsen GL, Bardaro MF Jr, Echodu DC, Drobny GP, Varani G. Intermediate rate atomic trajectories of RNA by solid-state NMR spectroscopy. J Am Chem Soc. 2010 Jan 13;132(1):303-8. doi: 10.1021/ja907515s. PubMed PMID: 19994901; PubMed Central PMCID: PMC2864776.
883	86	2009	19966940	Rrapo E, Zhu Y, Tian J, Hou H, Smith A, Fernandez F, Tan J, Giunta B. Green Tea-EGCG reduces GFAP associated neuronal loss in HIV-1 Tat transgenic mice. Am J Transl Res. 2009 Jan 1;1(1):72-9. PubMed PMID: 19966940; PubMed Central PMCID: PMC2776283.
884	86	2010	19966273	Jablonski JA, Amelio AL, Giacca M, Caputi M. The transcriptional transactivator Tat selectively regulates viral splicing. Nucleic Acids Res. 2010 Mar;38(4):1249-60. doi: 10.1093/nar/gkp1105. Epub 2009 Dec 4. PubMed PMID: 19966273; PubMed Central PMCID: PMC2831323.
885	NTU	2009	21994560	Gómez-Lucía E, Collado VM, Miró G, Doménech A. Effect of type-I interferon on retroviruses. Viruses. 2009 Dec;1(3):545-73. doi: 10.3390/v1030545. Epub 2009 Oct 27. PubMed PMID: 21994560; PubMed Central PMCID: PMC3185530.
886	72	2010	19941336	Williams R, Yao H, Peng F, Yang Y, Bethel-Brown C, Buch S. Cooperative induction of CXCL10 involves NADPH oxidase: Implications for HIV dementia. Glia. 2010 Apr;58(5):611-21. doi: 10.1002/glia.20949. PubMed PMID: 19941336; PubMed Central PMCID: PMC2820595.
887	86, 101	2010	19917610	Campbell GR, Loret EP, Spector SA. HIV-1 clade B Tat, but not clade C Tat, increases X4 HIV-1 entry into resting but not activated CD4+ T cells. J Biol Chem. 2010 Jan 15;285(3):1681-91. doi: 10.1074/jbc.M109.049957. Epub 2009 Nov 16. PubMed PMID: 19917610; PubMed Central PMCID: PMC2804326.
888	86	2009	19903262	Nukuzuma S, Kameoka M, Sugiura S, Nakamichi K, Nukuzuma C, Miyoshi I, Takegami T. Archetype JC virus efficiently propagates in kidney-derived cells stably expressing HIV-1 Tat. Microbiol Immunol. 2009 Nov;53(11):621-8. doi: 10.1111/j.1348-0421.2009.00166.x. PubMed PMID: 19903262.
889	101	2009	19901984	Meredith LW, Sivakumaran H, Major L, Suhrbier A, Harrich D. Potent inhibition of HIV-1 replication by a Tat mutant. PLoS One. 2009 Nov 10;4(11):e7769. doi: 10.1371/journal.pone.0007769. PubMed PMID: 19901984; PubMed Central PMCID: PMC2768900.
890	PEP	2009	19896372	Wang D, Iera J, Baker H, Hogan P, Ptak R, Yang L, Hartman T, Buckheit RW Jr, Desjardins A, Yang A, Legault P, Yedavalli V, Jeang KT, Appella DH. Multivalent binding oligomers inhibit HIV Tat-TAR interaction critical for viral replication. Bioorg Med Chem Lett. 2009 Dec 15;19(24):6893-7. doi: 10.1016/j.bmcl.2009.10.078. Epub 2009 Oct 23. PubMed PMID: 19896372; PubMed Central PMCID: PMC2783946.
891	72	2009	19886840	Heron PM, Turchan-Cholewo J, Bruce-Keller AJ, Wilson ME. Estrogen receptor alpha inhibits the estrogen-mediated suppression of HIV transcription in astrocytes: implications for estrogen neuroprotection in HIV dementia. AIDS Res Hum Retroviruses. 2009 Nov;25(11):1071-81. doi: 10.1089/aid.2009.0065. PubMed PMID: 19886840; PubMed Central PMCID: PMC2828252.
892	NAP	2009	19884766	Lee MJ, Park JH. Pathway analysis in HEK 293T cells overexpressing HIV-1 tat and nucleocapsid. J Microbiol Biotechnol. 2009 Oct;19(10):1103-8. PubMed PMID: 19884766.
893	NTU	2009	19833003	Chan EY, Korth MJ, Katze MG. Decoding the multifaceted HIV-1 virus-host interactome. J Biol. 2009 Oct 13;8(9):84. doi: 10.1186/jbiol183. PubMed PMID: 19833003; PubMed Central PMCID: PMC2776905.
894	LNS	2010	19825974	Zhang SM, Sun Y, Fan R, Xu QZ, Liu XD, Zhang X, Wang Y, Zhou PK. HIV-1 Tat regulates cyclin B1 by promoting both expression and degradation. FASEB J. 2010 Feb;24(2):495-503. doi: 10.1096/fj.09-143925. Epub 2009 Oct 13. PubMed PMID: 19825974; PubMed Central PMCID: PMC2812038.
895	86, 101	2009	19818711	Brès V, Yoshida T, Pickle L, Jones KA. SKIP interacts with c-Myc and Menin to promote HIV-1 Tat transactivation. Mol Cell. 2009 Oct 9;36(1):75-87. doi: 10.1016/j.molcel.2009.08.015. PubMed PMID: 19818711; PubMed Central PMCID: PMC2766281.
896	NTU	2009	19812204	Brahmachari S, Jana A, Pahan K. Sodium benzoate, a metabolite of cinnamon and a food additive, reduces microglial and astroglial inflammatory responses. J Immunol. 2009 Nov 1;183(9):5917-27. doi: 10.4049/jimmunol.0803336. Epub 2009 Oct 7. PubMed PMID: 19812204; PubMed Central PMCID: PMC2862570.
897	LNS	2010	19794400	Zhong Y, Hennig B, Toborek M. Intact lipid rafts regulate HIV-1 Tat protein-induced activation of the Rho signaling and upregulation of P-glycoprotein in brain endothelial cells. J Cereb Blood Flow Metab. 2010 Mar;30(3):522-33. doi: 10.1038/jcbfm.2009.214. Epub 2009 Sep 30. PubMed PMID: 19794400; PubMed Central PMCID: PMC2949153.
898	LNS	2010	19741733	Kiem HP, Wu RA, Sun G, von Laer D, Rossi JJ, Trobridge GD. Foamy combinatorial anti-HIV vectors with MGMTP140K potently inhibit HIV-1 and SHIV replication and mediate selection in vivo. Gene Ther. 2010 Jan;17(1):37-49. doi: 10.1038/gt.2009.118. Epub 2009 Sep 10. PubMed PMID: 19741733; PubMed Central PMCID: PMC3162371.
899	101	2009	19726520	Sivakumaran H, van der Horst A, Fulcher AJ, Apolloni A, Lin MH, Jans DA, Harrich D. Arginine methylation increases the stability of human immunodeficiency virus type 1 Tat. J Virol. 2009 Nov;83(22):11694-703. doi: 10.1128/JVI.00499-09. Epub 2009 Sep 2. PubMed PMID: 19726520; PubMed Central PMCID: PMC2772670.
900	NTU	2009	19726504	Mizutani T, Ishizaka A, Tomizawa M, Okazaki T, Yamamichi N, Kawana-Tachikawa A, Iwamoto A, Iba H. Loss of the Brm-type SWI/SNF chromatin remodeling complex is a strong barrier to the Tat-independent transcriptional elongation of human immunodeficiency virus type 1 transcripts. J Virol. 2009 Nov;83(22):11569-80. doi: 10.1128/JVI.00742-09. Epub 2009 Sep 2. PubMed PMID: 19726504; PubMed Central PMCI…
901	LNS	2009	19712456	Rasheed S, Yan JS, Hussain A, Lai B. Proteomic characterization of HIV-modulated membrane receptors, kinases and signaling proteins involved in novel angiogenic pathways. J Transl Med. 2009 Aug 27;7:75. doi: 10.1186/1479-5876-7-75. PubMed PMID: 19712456; PubMed Central PMCID: PMC2754444.
902	PEP	2009	19707187	Nakase I, Hirose H, Tanaka G, Tadokoro A, Kobayashi S, Takeuchi T, Futaki S. Cell-surface accumulation of flock house virus-derived peptide leads to efficient internalization via macropinocytosis. Mol Ther. 2009 Nov;17(11):1868-76. doi: 10.1038/mt.2009.192. Epub 2009 Aug 25. PubMed PMID: 19707187; PubMed Central PMCID: PMC2835031.
903	86	2009	19696076	Fenard D, Houzet L, Bernard E, Tupin A, Brun S, Mougel M, Devaux C, Chazal N, Briant L. Uracil DNA Glycosylase 2 negatively regulates HIV-1 LTR transcription. Nucleic Acids Res. 2009 Oct;37(18):6008-18. doi: 10.1093/nar/gkp673. Epub 2009 Aug 20. PubMed PMID: 19696076; PubMed Central PMCID: PMC2764447.
904	86	2009	19690520	Anderson JS, Javien J, Nolta JA, Bauer G. Preintegration HIV-1 inhibition by a combination lentiviral vector containing a chimeric TRIM5 alpha protein, a CCR5 shRNA, and a TAR decoy. Mol Ther. 2009 Dec;17(12):2103-14. doi: 10.1038/mt.2009.187. Epub 2009 Aug 18. PubMed PMID: 19690520; PubMed Central PMCID: PMC2814390.
905	LNS	2009	19680266	Yao H, Peng F, Fan Y, Zhu X, Hu G, Buch SJ. TRPC channel-mediated neuroprotection by PDGF involves Pyk2/ERK/CREB pathway. Cell Death Differ. 2009 Dec;16(12):1681-93. doi: 10.1038/cdd.2009.108. Epub 2009 Aug 14. PubMed PMID: 19680266; PubMed Central PMCID: PMC2783976.
906	PEP, 72, 86	2009	19671151	Charnay N, Ivanyi-Nagy R, Soto-Rifo R, Ohlmann T, López-Lastra M, Darlix JL. Mechanism of HIV-1 Tat RNA translation and its activation by the Tat protein. Retrovirology. 2009 Aug 11;6:74. doi: 10.1186/1742-4690-6-74. PubMed PMID: 19671151; PubMed Central PMCID: PMC2739156.
907	PEP	2010	19669668	Pan C, Lu B, Chen H, Bishop CE. Reprogramming human fibroblasts using HIV-1 TAT recombinant proteins OCT4, SOX2, KLF4 and c-MYC. Mol Biol Rep. 2010 Apr;37(4):2117-24. doi: 10.1007/s11033-009-9680-6. Epub 2009 Aug 9. PubMed PMID: 19669668; PubMed Central PMCID: PMC3772671.
908	LNS	2009	19667073	Okunola HL, Krainer AR. Cooperative-binding and splicing-repressive properties of hnRNP A1. Mol Cell Biol. 2009 Oct;29(20):5620-31. doi: 10.1128/MCB.01678-08. Epub 2009 Aug 10. PubMed PMID: 19667073; PubMed Central PMCID: PMC2756886.
909	PEP, 86	2009	19661268	Urbinati C, Nicoli S, Giacca M, David G, Fiorentini S, Caruso A, Alfano M, Cassetta L, Presta M, Rusnati M. HIV-1 Tat and heparan sulfate proteoglycan interaction: a novel mechanism of lymphocyte adhesion and migration across the endothelium. Blood. 2009 Oct 8;114(15):3335-42. doi: 10.1182/blood-2009-01-198945. Epub 2009 Aug 6. PubMed PMID: 19661268.
910	86	2009	19651874	Doria M, Neri F, Gallo A, Farace MG, Michienzi A. Editing of HIV-1 RNA by the double-stranded RNA deaminase ADAR1 stimulates viral infection. Nucleic Acids Res. 2009 Sep;37(17):5848-58. doi: 10.1093/nar/gkp604. Epub 2009 Aug 3. PubMed PMID: 19651874; PubMed Central PMCID: PMC2761272.
911	PEP, 72	2010	19643969	Chothe PP, Thakkar SV, Gnana-Prakasam JP, Ananth S, Hinton DR, Kannan R, Smith SB, Martin PM, Ganapathy V. Identification of a novel sodium-coupled oligopeptide transporter (SOPT2) in mouse and human retinal pigment epithelial cells. Invest Ophthalmol Vis Sci. 2010 Jan;51(1):413-20. doi: 10.1167/iovs.09-4048. Epub 2009 Jul 30. PubMed PMID: 19643969; PubMed Central PMCID: PMC3973186.
912	PEP	2009	19632256	Rachek LI, Yuzefovych LV, Ledoux SP, Julie NL, Wilson GL. Troglitazone, but not rosiglitazone, damages mitochondrial DNA and induces mitochondrial dysfunction and cell death in human hepatocytes. Toxicol Appl Pharmacol. 2009 Nov 1;240(3):348-54. doi: 10.1016/j.taap.2009.07.021. Epub 2009 Jul 24. PubMed PMID: 19632256; PubMed Central PMCID: PMC2767118.
913	LNS	2009	19630958	Guendel I, Carpio L, Easley R, Van Duyne R, Coley W, Agbottah E, Dowd C, Kashanchi F, Kehn-Hall K. 9-Aminoacridine inhibition of HIV-1 Tat dependent transcription. Virol J. 2009 Jul 24;6:114. doi: 10.1186/1743-422X-6-114. PubMed PMID: 19630958; PubMed Central PMCID: PMC2723079.
914	72	2009	19626680	Charles S, Ammosova T, Cardenas J, Foster A, Rotimi J, Jerebtsova M, Ayodeji AA, Niu X, Ray PE, Gordeuk VR, Kashanchi F, Nekhai S. Regulation of HIV-1 transcription at 3% versus 21% oxygen concentration. J Cell Physiol. 2009 Nov;221(2):469-79. doi: 10.1002/jcp.21882. PubMed PMID: 19626680; PubMed Central PMCID: PMC2778305.
915	86, 101	2009	19621989	Gandhi N, Saiyed Z, Thangavel S, Rodriguez J, Rao KV, Nair MP. Differential effects of HIV type 1 clade B and clade C Tat protein on expression of proinflammatory and antiinflammatory cytokines by primary monocytes. AIDS Res Hum Retroviruses. 2009 Jul;25(7):691-9. doi: 10.1089/aid.2008.0299. PubMed PMID: 19621989; PubMed Central PMCID: PMC2853861.
916	72	2009	19619615	Self RL, Smith KJ, Butler TR, Pauly JR, Prendergast MA. Intra-cornu ammonis 1 administration of the human immunodeficiency virus-1 protein trans-activator of transcription exacerbates the ethanol withdrawal syndrome in rodents and activates N-methyl-D-aspartate glutamate receptors to produce persisting spatial learning deficits. Neuroscience. 2009 Oct 20;163(3):868-76. doi: 10.1016/j.neuroscience…
917	86, 101	2009	19615365	Aksenov MY, Aksenova MV, Mactutus CF, Booze RM. Attenuated neurotoxicity of the transactivation-defective HIV-1 Tat protein in hippocampal cell cultures. Exp Neurol. 2009 Oct;219(2):586-90. doi: 10.1016/j.expneurol.2009.07.005. Epub 2009 Jul 15. PubMed PMID: 19615365; PubMed Central PMCID: PMC2770879.
918	86	2009	19607724	Carobene MG, Rodríguez Rodrígues C, De Candia CA, Turk G, Salomón H. In vitro dynamics of HIV-1 BF intersubtype recombinants genomic regions involved in the regulation of gene expression. Virol J. 2009 Jul 16;6:107. doi: 10.1186/1743-422X-6-107. PubMed PMID: 19607724; PubMed Central PMCID: PMC2717942.
919	86	2009	19603446	Ali A, Ghosh A, Nathans RS, Sharova N, O'Brien S, Cao H, Stevenson M, Rana TM. Identification of flavopiridol analogues that selectively inhibit positive transcription elongation factor (P-TEFb) and block HIV-1 replication. Chembiochem. 2009 Aug 17;10(12):2072-80. doi: 10.1002/cbic.200900303. PubMed PMID: 19603446; PubMed Central PMCID: PMC2754223.
920	LNS	2009	19584251	Davidson A, Leeper TC, Athanassiou Z, Patora-Komisarska K, Karn J, Robinson JA, Varani G. Simultaneous recognition of HIV-1 TAR RNA bulge and loop sequences by cyclic peptide mimics of Tat protein. Proc Natl Acad Sci U S A. 2009 Jul 21;106(29):11931-6. doi: 10.1073/pnas.0900629106. Epub 2009 Jul 7. PubMed PMID: 19584251; PubMed Central PMCID: PMC2715490.
921	LNS	2009	19576918	Zhu X, Yao H, Peng F, Callen S, Buch S. PDGF-mediated protection of SH-SY5Y cells against Tat toxin involves regulation of extracellular glutamate and intracellular calcium. Toxicol Appl Pharmacol. 2009 Oct 15;240(2):286-91. doi: 10.1016/j.taap.2009.06.020. Epub 2009 Jul 2. PubMed PMID: 19576918; PubMed Central PMCID: PMC2753679.
922	LNS	2009	19571107	Garrison KE, Champiat S, York VA, Agrawal AT, Kallas EG, Martin JN, Hecht FM, Deeks SG, Nixon DF. Transcriptional errors in human immunodeficiency virus type 1 generate targets for T-cell responses. Clin Vaccine Immunol. 2009 Sep;16(9):1369-71. doi: 10.1128/CVI.00410-08. Epub 2009 Jul 1. PubMed PMID: 19571107; PubMed Central PMCID: PMC2745002.
923	86	2009	19553325	Iyer SR, Yu D, Biancotto A, Margolis LB, Wu Y. Measurement of human immunodeficiency virus type 1 preintegration transcription by using Rev-dependent Rev-CEM cells reveals a sizable transcribing DNA population comparable to that from proviral templates. J Virol. 2009 Sep;83(17):8662-73. doi: 10.1128/JVI.00874-09. Epub 2009 Jun 24. PubMed PMID: 19553325; PubMed Central PMCID: PMC2738211.
924	86	2009	19549783	Yezid H, Konate K, Debaisieux S, Bonhoure A, Beaumelle B. Mechanism for HIV-1 Tat insertion into the endosome membrane. J Biol Chem. 2009 Aug 21;284(34):22736-46. doi: 10.1074/jbc.M109.023705. Epub 2009 Jun 23. PubMed PMID: 19549783; PubMed Central PMCID: PMC2755682.
925	NTU	2009	19535902	He JJ, Henao-Mejia J, Liu Y. Sam68 functions in nuclear export and translation of HIV-1 RNA. RNA Biol. 2009 Sep-Oct;6(4):384-6. Epub 2009 Sep 1. PubMed PMID: 19535902; PubMed Central PMCID: PMC2792590.
926	PEP	2009	19513001	Massodi I, Thomas E, Raucher D. Application of thermally responsive elastin-like polypeptide fused to a lactoferrin-derived peptide for treatment of pancreatic cancer. Molecules. 2009 Jun 4;14(6):1999-2015. doi: 10.3390/molecules14061999. PubMed PMID: 19513001; PubMed Central PMCID: PMC6254221.
927	86	2010	19489004	Fitting S, Booze RM, Hasselrot U, Mactutus CF. Dose-dependent long-term effects of Tat in the rat hippocampal formation: a design-based stereological study. Hippocampus. 2010 Apr;20(4):469-80. doi: 10.1002/hipo.20648. PubMed PMID: 19489004; PubMed Central PMCID: PMC3841077.
928	LNS	2009	19487424	Salazar-Gonzalez JF, Salazar MG, Keele BF, Learn GH, Giorgi EE, Li H, Decker JM, Wang S, Baalwa J, Kraus MH, Parrish NF, Shaw KS, Guffey MB, Bar KJ, Davis KL, Ochsenbauer-Jambor C, Kappes JC, Saag MS, Cohen MS, Mulenga J, Derdeyn CA, Allen S, Hunter E, Markowitz M, Hraber P, Perelson AS, Bhattacharya T, Haynes BF, Korber BT, Hahn BH, Shaw GM. Genetic identity, biological phenotype, and evolutiona…
929	72	2009	19479051	Williams R, Yao H, Dhillon NK, Buch SJ. HIV-1 Tat co-operates with IFN-gamma and TNF-alpha to increase CXCL10 in human astrocytes. PLoS One. 2009 May 28;4(5):e5709. doi: 10.1371/journal.pone.0005709. PubMed PMID: 19479051; PubMed Central PMCID: PMC2684622.
930	86	2009	19479034	Miller HB, Saunders KO, Tomaras GD, Garcia-Blanco MA. Tat-SF1 is not required for Tat transactivation but does regulate the relative levels of unspliced and spliced HIV-1 RNAs. PLoS One. 2009 May 27;4(5):e5710. doi: 10.1371/journal.pone.0005710. PubMed PMID: 19479034; PubMed Central PMCID: PMC2682658.
931	PEP	2009	19478527	Meng S, Wei B, Xu R, Zhang K, Wang L, Zhang R, Li J. TAT peptides mediated small interfering RNA delivery to Huh-7 cells and efficiently inhibited hepatitis C virus RNA replication. Intervirology. 2009;52(3):135-40. doi: 10.1159/000220597. Epub 2009 May 27. PubMed PMID: 19478527.
932	PEP	2009	19470243	Lee MJ, Kim DW, Lee YP, Jeong HJ, Kang HW, Shin MJ, Sohn EJ, Kim MJ, Jang SH, Kang TC, Won MH, Min BH, Cho SW, Lee KS, Park J, Eum WS, Choi SY. Inhibition of LPS-induced nitric oxide production by transduced Tat-arginine deiminase fusion protein in Raw 264.7 cells. BMB Rep. 2009 May 31;42(5):286-92. PubMed PMID: 19470243.
933	72	2009	19462331	Bokhari SM, Yao H, Bethel-Brown C, Fuwang P, Williams R, Dhillon NK, Hegde R, Kumar A, Buch SJ. Morphine enhances Tat-induced activation in murine microglia. J Neurovirol. 2009 May;15(3):219-28. doi: 10.1080/13550280902913628. PubMed PMID: 19462331; PubMed Central PMCID: PMC3121575.
934	86	2009	19454010	Gautier VW, Gu L, O'Donoghue N, Pennington S, Sheehy N, Hall WW. In vitro nuclear interactome of the HIV-1 Tat protein. Retrovirology. 2009 May 19;6:47. doi: 10.1186/1742-4690-6-47. PubMed PMID: 19454010; PubMed Central PMCID: PMC2702331.
935	LNS	2009	19450270	Evans P, Dampier W, Ungar L, Tozeren A. Prediction of HIV-1 virus-host protein interactions using virus and host sequence motifs. BMC Med Genomics. 2009 May 18;2:27. doi: 10.1186/1755-8794-2-27. PubMed PMID: 19450270; PubMed Central PMCID: PMC2694829.
936	LNS	2009	19434236	Westrop SJ, Qazi NA, Pido-Lopez J, Nelson MR, Gazzard B, Gotch FM, Imami N. Transient nature of long-term nonprogression and broad virus-specific proliferative T-cell responses with sustained thymic output in HIV-1 controllers. PLoS One. 2009;4(5):e5474. doi: 10.1371/journal.pone.0005474. Epub 2009 May 12. PubMed PMID: 19434236; PubMed Central PMCID: PMC2677159.
937	86	2009	19420158	Stettner MR, Nance JA, Wright CA, Kinoshita Y, Kim WK, Morgello S, Rappaport J, Khalili K, Gordon J, Johnson EM. SMAD proteins of oligodendroglial cells regulate transcription of JC virus early and late genes coordinately with the Tat protein of human immunodeficiency virus type 1. J Gen Virol. 2009 Aug;90(Pt 8):2005-14. doi: 10.1099/vir.0.011072-0. Epub 2009 May 6. PubMed PMID: 19420158; PubMed …
938	86, 101	2009	19327051	Samikkannu T, Saiyed ZM, Rao KV, Babu DK, Rodriguez JW, Papuashvili MN, Nair MP. Differential regulation of indoleamine-2,3-dioxygenase (IDO) by HIV type 1 clade B and C Tat protein. AIDS Res Hum Retroviruses. 2009 Mar;25(3):329-35. doi: 10.1089/aid.2008.0225. PubMed PMID: 19327051; PubMed Central PMCID: PMC2853835.
939	PEP, 86	2009	19325033	Zhu J, Mactutus CF, Wallace DR, Booze RM. HIV-1 Tat protein-induced rapid and reversible decrease in [3H]dopamine uptake: dissociation of [3H]dopamine uptake and [3H]2beta-carbomethoxy-3-beta-(4-fluorophenyl)tropane (WIN 35,428) binding in rat striatal synaptosomes. J Pharmacol Exp Ther. 2009 Jun;329(3):1071-83. doi: 10.1124/jpet.108.150144. Epub 2009 Mar 26. PubMed PMID: 19325033; PubMed Central…
940	PEP	2009	19303399	McDunn JE, Muenzer JT, Dunne B, Zhou A, Yuan K, Hoekzema A, Hilliard C, Chang KC, Davis CG, McDonough J, Hunt C, Grigsby P, Piwnica-Worms D, Hotchkiss RS. An anti-apoptotic peptide improves survival in lethal total body irradiation. Biochem Biophys Res Commun. 2009 May 15;382(4):657-62. doi: 10.1016/j.bbrc.2009.03.080. Epub 2009 Mar 19. PubMed PMID: 19303399; PubMed Central PMCID: PMC2854649.
941	86	2009	19299483	Kalantari P, Narayan V, Henderson AJ, Prabhu KS. 15-Deoxy-Delta12,14-prostaglandin J2 inhibits HIV-1 transactivating protein, Tat, through covalent modification. FASEB J. 2009 Aug;23(8):2366-73. doi: 10.1096/fj.08-124982. Epub 2009 Mar 19. PubMed PMID: 19299483; PubMed Central PMCID: PMC2717765.
942	86	2009	19294002	Giunta B, Hou H, Zhu Y, Rrapo E, Tian J, Takashi M, Commins D, Singer E, He J, Fernandez F, Tan J. HIV-1 Tat contributes to Alzheimer's disease-like pathology in PSAPP mice. Int J Clin Exp Pathol. 2009;2(5):433-43. Epub 2009 Jan 30. PubMed PMID: 19294002; PubMed Central PMCID: PMC2655152.
943	86	2009	19287189	Ju SM, Song HY, Lee JA, Lee SJ, Choi SY, Park J. Extracellular HIV-1 Tat up-regulates expression of matrix metalloproteinase-9 via a MAPK-NF-kappaB dependent pathway in human astrocytes. Exp Mol Med. 2009 Feb 28;41(2):86-93. PubMed PMID: 19287189; PubMed Central PMCID: PMC2679334.
944	86	2009	19279332	Cheng SM, Li JC, Lin SS, Lee DC, Liu L, Chen Z, Lau AS. HIV-1 transactivator protein induction of suppressor of cytokine signaling-2 contributes to dysregulation of IFN{gamma} signaling. Blood. 2009 May 21;113(21):5192-201. doi: 10.1182/blood-2008-10-183525. Epub 2009 Mar 11. PubMed PMID: 19279332.
945	PEP	2009	19278221	Zhang X, Jin Y, Plummer MR, Pooyan S, Gunaseelan S, Sinko PJ. Endocytosis and membrane potential are required for HeLa cell uptake of R.I.-CKTat9, a retro-inverso Tat cell penetrating peptide. Mol Pharm. 2009 May-Jun;6(3):836-48. doi: 10.1021/mp800121f. PubMed PMID: 19278221; PubMed Central PMCID: PMC2859821.
946	86, 101	2009	19268337	Yukl S, Pillai S, Li P, Chang K, Pasutti W, Ahlgren C, Havlir D, Strain M, Günthard H, Richman D, Rice AP, Daar E, Little S, Wong JK. Latently-infected CD4+ T cells are enriched for HIV-1 Tat variants with impaired transactivation activity. Virology. 2009 Apr 25;387(1):98-108. doi: 10.1016/j.virol.2009.01.013. Epub 2009 Mar 5. PubMed PMID: 19268337; PubMed Central PMCID: PMC4474533.
947	86	2009	19265483	O'Hara SP, Small AJ, Gajdos GB, Badley AD, Chen XM, Larusso NF. HIV-1 Tat protein suppresses cholangiocyte toll-like receptor 4 expression and defense against Cryptosporidium parvum. J Infect Dis. 2009 Apr 15;199(8):1195-204. doi: 10.1086/597387. PubMed PMID: 19265483; PubMed Central PMCID: PMC2716168.
948	86	2009	19234184	Fanales-Belasio E, Moretti S, Fiorelli V, Tripiciano A, Pavone Cossut MR, Scoglio A, Collacchi B, Nappi F, Macchia I, Bellino S, Francavilla V, Caputo A, Barillari G, Magnani M, Laguardia ME, Cafaro A, Titti F, Monini P, Ensoli F, Ensoli B. HIV-1 Tat addresses dendritic cells to induce a predominant Th1-type adaptive immune response that appears prevalent in the asymptomatic stage of infection. J…
949	LNS	2009	19223581	D'Orso I, Frankel AD. Tat acetylation modulates assembly of a viral-host RNA-protein transcription complex. Proc Natl Acad Sci U S A. 2009 Mar 3;106(9):3101-6. doi: 10.1073/pnas.0900012106. Epub 2009 Feb 17. PubMed PMID: 19223581; PubMed Central PMCID: PMC2651313.
950	LNS	2009	19219022	Mitsuyasu RT, Merigan TC, Carr A, Zack JA, Winters MA, Workman C, Bloch M, Lalezari J, Becker S, Thornton L, Akil B, Khanlou H, Finlayson R, McFarlane R, Smith DE, Garsia R, Ma D, Law M, Murray JM, von Kalle C, Ely JA, Patino SM, Knop AE, Wong P, Todd AV, Haughton M, Fuery C, Macpherson JL, Symonds GP, Evans LA, Pond SM, Cooper DA. Phase 2 gene therapy trial of an anti-HIV ribozyme in autologous …
951	LNS	2009	19218918	Schnettler E, de Vries W, Hemmes H, Haasnoot J, Kormelink R, Goldbach R, Berkhout B. The NS3 protein of rice hoja blanca virus complements the RNAi suppressor function of HIV-1 Tat. EMBO Rep. 2009 Mar;10(3):258-63. doi: 10.1038/embor.2009.6. Epub 2009 Feb 13. PubMed PMID: 19218918; PubMed Central PMCID: PMC2658557.
952	PEP	2009	19214198	Waldeck W, Pipkorn R, Korn B, Mueller G, Schick M, Tóth K, Wiessler M, Didinger B, Braun K. Transporter molecules influence the gene expression in HeLa cells. Int J Med Sci. 2009;6(1):18-27. Epub 2008 Dec 18. PubMed PMID: 19214198; PubMed Central PMCID: PMC2610340.
953	72	2009	19211873	Yao H, Peng F, Dhillon N, Callen S, Bokhari S, Stehno-Bittel L, Ahmad SO, Wang JQ, Buch S. Involvement of TRPC channels in CCL2-mediated neuroprotection against tat toxicity. J Neurosci. 2009 Feb 11;29(6):1657-69. doi: 10.1523/JNEUROSCI.2781-08.2009. PubMed PMID: 19211873; PubMed Central PMCID: PMC2768421.
954	LNS	2009	19211771	Dong C, Kwas C, Wu L. Transcriptional restriction of human immunodeficiency virus type 1 gene expression in undifferentiated primary monocytes. J Virol. 2009 Apr;83(8):3518-27. doi: 10.1128/JVI.02665-08. Epub 2009 Feb 11. PubMed PMID: 19211771; PubMed Central PMCID: PMC2663290.
955	LNS	2009	19210761	Vrolijk MM, Harwig A, Berkhout B, Das AT. Destabilization of the TAR hairpin leads to extension of the polyA hairpin and inhibition of HIV-1 polyadenylation. Retrovirology. 2009 Feb 11;6:13. doi: 10.1186/1742-4690-6-13. PubMed PMID: 19210761; PubMed Central PMCID: PMC2645353.
956	LNS	2009	19209727	Tastan O, Qi Y, Carbonell JG, Klein-Seetharaman J. Prediction of interactions between HIV-1 and human proteins by information integration. Pac Symp Biocomput. 2009:516-27. PubMed PMID: 19209727; PubMed Central PMCID: PMC3263379.
957	86	2009	19193217	Lassiter C, Fan X, Joshi PC, Jacob BA, Sutliff RL, Jones DP, Koval M, Guidot DM. HIV-1 transgene expression in rats causes oxidant stress and alveolar epithelial barrier dysfunction. AIDS Res Ther. 2009 Feb 4;6:1. doi: 10.1186/1742-6405-6-1. PubMed PMID: 19193217; PubMed Central PMCID: PMC2644707.
958	86	2009	19148268	Sung TL, Rice AP. miR-198 inhibits HIV-1 gene expression and replication in monocytes and its mechanism of action appears to involve repression of cyclin T1. PLoS Pathog. 2009 Jan;5(1):e1000263. doi: 10.1371/journal.ppat.1000263. Epub 2009 Jan 16. PubMed PMID: 19148268; PubMed Central PMCID: PMC2607557.
959	86, 101	2009	19144136	Michel N, Goffinet C, Ganter K, Allespach I, Kewalramani VN, Saifuddin M, Littman DR, Greene WC, Goldsmith MA, Keppler OT. Human cyclin T1 expression ameliorates a T-cell-specific transcriptional limitation for HIV in transgenic rats, but is not sufficient for a spreading infection of prototypic R5 HIV-1 strains ex vivo. Retrovirology. 2009 Jan 13;6:2. doi: 10.1186/1742-4690-6-2. PubMed PMID: 191…
960	PEP	2009	19139066	Bardaro MF Jr, Shajani Z, Patora-Komisarska K, Robinson JA, Varani G. How binding of small molecule and peptide ligands to HIV-1 TAR alters the RNA motional landscape. Nucleic Acids Res. 2009 Apr;37(5):1529-40. doi: 10.1093/nar/gkn1074. Epub 2009 Jan 12. PubMed PMID: 19139066; PubMed Central PMCID: PMC2655691.
961	NTU	2009	19132086	Burnett JC, Miller-Jensen K, Shah PS, Arkin AP, Schaffer DV. Control of stochastic gene expression by host factors at the HIV promoter. PLoS Pathog. 2009 Jan;5(1):e1000260. doi: 10.1371/journal.ppat.1000260. Epub 2009 Jan 9. PubMed PMID: 19132086; PubMed Central PMCID: PMC2607019.
962	86	2009	19122141	Qian S, Zhong X, Yu L, Ding B, de Haan P, Boris-Lawrie K. HIV-1 Tat RNA silencing suppressor activity is conserved across kingdoms and counteracts translational repression of HIV-1. Proc Natl Acad Sci U S A. 2009 Jan 13;106(2):605-10. doi: 10.1073/pnas.0806822106. Epub 2009 Jan 2. PubMed PMID: 19122141; PubMed Central PMCID: PMC2626750.
963	PEP	2009	19119812	Belousoff MJ, Ung P, Forsyth CM, Tor Y, Spiccia L, Graham B. New macrocyclic terbium(III) complex for use in RNA footprinting experiments. J Am Chem Soc. 2009 Jan 28;131(3):1106-14. doi: 10.1021/ja807301r. PubMed PMID: 19119812; PubMed Central PMCID: PMC2633772.
964	NTU	2009	20975916	Kandathil AJ, Kannangai R, Abraham OC, Pulimood SA, Sridharan G. Amino acid sequence divergence of Tat protein (exon1)of subtype B and C HIV-1 strains: Does it have implications for vaccine development? Bioinformation. 2009 Dec 12;4(6):237-41. PubMed PMID: 20975916; PubMed Central PMCID: PMC2951709.
965	86	2009	19110017	Park J, Nadeau PE, Mergia A. Activity of TAR in inducible inhibition of HIV replication by foamy virus vector expressing siRNAs under the control of HIV LTR. Virus Res. 2009 Mar;140(1-2):112-20. doi: 10.1016/j.virusres.2008.11.016. Epub 2009 Jan 9. PubMed PMID: 19110017; PubMed Central PMCID: PMC2683472.
966	86	2009	19086089	Ferris MJ, Frederick-Duus D, Fadel J, Mactutus CF, Booze RM. In vivo microdialysis in awake, freely moving rats demonstrates HIV-1 Tat-induced alterations in dopamine transmission. Synapse. 2009 Mar;63(3):181-5. doi: 10.1002/syn.20594. PubMed PMID: 19086089; PubMed Central PMCID: PMC3704183.
967	86	2009	19034668	Bachis A, Biggio F, Major EO, Mocchetti I. M- and T-tropic HIVs promote apoptosis in rat neurons. J Neuroimmune Pharmacol. 2009 Mar;4(1):150-60. doi: 10.1007/s11481-008-9141-3. Epub 2008 Nov 26. PubMed PMID: 19034668; PubMed Central PMCID: PMC2683632.
968	72, 86, 101	2009	19022302	Passiatore G, Rom S, Eletto D, Peruzzi F. HIV-1 Tat C-terminus is cleaved by calpain 1: implication for Tat-mediated neurotoxicity. Biochim Biophys Acta. 2009 Feb;1793(2):378-87. doi: 10.1016/j.bbamcr.2008.10.010. Epub 2008 Oct 31. PubMed PMID: 19022302; PubMed Central PMCID: PMC2704945.
969	72, 101	2009	19020833	Rao VR, Eugenin EA, Berman JW, Prasad VR. Methods to study monocyte migration induced by HIV-infected cells. Methods Mol Biol. 2009;485:295-309. doi: 10.1007/978-1-59745-170-3_20. PubMed PMID: 19020833; PubMed Central PMCID: PMC4350668.
970	86	2009	19013459	Aksenova MV, Aksenov MY, Adams SM, Mactutus CF, Booze RM. Neuronal survival and resistance to HIV-1 Tat toxicity in the primary culture of rat fetal neurons. Exp Neurol. 2009 Feb;215(2):253-63. doi: 10.1016/j.expneurol.2008.10.006. Epub 2008 Oct 28. PubMed PMID: 19013459; PubMed Central PMCID: PMC2663805.
971	86	2009	19004620	Cedeno-Laurent F, Bryant J, Fishelevich R, Jones OD, Deng A, Eng ML, Gaspari AA, Trujillo JR. Inflammatory papillomatous hyperplasia and epidermal necrosis in a transgenic rat for HIV-1. J Dermatol Sci. 2009 Feb;53(2):112-9. doi: 10.1016/j.jdermsci.2008.08.015. Epub 2008 Nov 11. PubMed PMID: 19004620; PubMed Central PMCID: PMC3125122.
972	LNS	2009	18945774	Gray CM, Mlotshwa M, Riou C, Mathebula T, de Assis Rosa D, Mashishi T, Seoighe C, Ngandu N, van Loggerenberg F, Morris L, Mlisana K, Williamson C, Karim SA; CAPRISA 002 Acute Infection Study Team. Human immunodeficiency virus-specific gamma interferon enzyme-linked immunospot assay responses targeting specific regions of the proteome during primary subtype C infection are poor predictors of the c…
973	86	2009	18756534	Hauser KF, Hahn YK, Adjan VV, Zou S, Buch SK, Nath A, Bruce-Keller AJ, Knapp PE. HIV-1 Tat and morphine have interactive effects on oligodendrocyte survival and morphology. Glia. 2009 Jan 15;57(2):194-206. doi: 10.1002/glia.20746. PubMed PMID: 18756534; PubMed Central PMCID: PMC2743138.
